# Supplementary material for: Discrimination as a predictor of poor mental health among LGBTQ+ people during the COVID-19 pandemic: cross-sectional analysis of the online Queerantine study
Source: PubMed Central journal article supplement — BMJ Open. 2021 Jun 25;11(6):e049405. doi: 10.1136/bmjopen-2021-049405 (PMC8238529; doi:10.1136/bmjopen-2021-049405), 2021-06-25
Supplement: bmjopen-2021-049405.draft_revisions.pdf [file bmjopen-2021-049405.draft_revisions.pdf]

# BMJ Open

BMJ Open is committed to open peer review. As part of this commitment we make the peer review history of every article we publish publicly available.

When an article is published we post the peer reviewers' comments and the authors' responses online. We also post the versions of the paper that were used during peer review. These are the versions that the peer review comments apply to.

The versions of the paper that follow are the versions that were submitted during the peer review process. They are not the versions of record or the final published versions. They should not be cited or distributed as the published version of this manuscript.

BMJ Open is an open access journal and the full, final, typeset and author-corrected version of record of the manuscript is available on our site with no access controls, subscription charges or pay-per-view fees (<http://bmjopen.bmj.com>).

If you have any questions on BMJ Open's open peer review process please email [info.bmjopen@bmj.com](mailto:info.bmjopen@bmj.com)

# BMJ Open

## The mental health and experiences of discrimination of LGBTQ+ people during the COVID-19 pandemic: Findings from the Queerantime Study

|                               |                                                                                                                                                          |
|-------------------------------|----------------------------------------------------------------------------------------------------------------------------------------------------------|
| Journal:                      | <i>BMJ Open</i>                                                                                                                                          |
| Manuscript ID                 | bmjopen-2021-049405                                                                                                                                      |
| Article Type:                 | Original research                                                                                                                                        |
| Date Submitted by the Author: | 23-Jan-2021                                                                                                                                              |
| Complete List of Authors:     | Kneale, Dylan; University College London, EPPI-Centre, UCL Social Research Institute<br>Becares, Laia; University of Sussex, Social Work and Social Care |
| Keywords:                     | COVID-19, MENTAL HEALTH, SOCIAL MEDICINE                                                                                                                 |
|                               |                                                                                                                                                          |

SCHOLARONE™  
Manuscripts

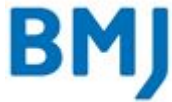

I, the Submitting Author has the right to grant and does grant on behalf of all authors of the Work (as defined in the below author licence), an exclusive licence and/or a non-exclusive licence for contributions from authors who are: i) UK Crown employees; ii) where BMJ has agreed a CC-BY licence shall apply, and/or iii) in accordance with the terms applicable for US Federal Government officers or employees acting as part of their official duties; on a worldwide, perpetual, irrevocable, royalty-free basis to BMJ Publishing Group Ltd ("BMJ") its licensees and where the relevant Journal is co-owned by BMJ to the co-owners of the Journal, to publish the Work in this journal and any other BMJ products and to exploit all rights, as set out in our [licence](#).

The Submitting Author accepts and understands that any supply made under these terms is made by BMJ to the Submitting Author unless you are acting as an employee on behalf of your employer or a postgraduate student of an affiliated institution which is paying any applicable article publishing charge ("APC") for Open Access articles. Where the Submitting Author wishes to make the Work available on an Open Access basis (and intends to pay the relevant APC), the terms of reuse of such Open Access shall be governed by a Creative Commons licence – details of these licences and which [Creative Commons](#) licence will apply to this Work are set out in our licence referred to above.

Other than as permitted in any relevant BMJ Author's Self Archiving Policies, I confirm this Work has not been accepted for publication elsewhere, is not being considered for publication elsewhere and does not duplicate material already published. I confirm all authors consent to publication of this Work and authorise the granting of this licence.

# The mental health and experiences of discrimination of LGBTQ+ people during the COVID-19 pandemic: Findings from the Queerantime Study

Dylan Kneale<sup>1</sup> and Laia Bécares<sup>2,\*</sup>

<sup>1</sup> EPPI-Centre, UCL Social Research Institute, University College London

<sup>2</sup> School of Education and Social Work, University of Sussex

\*Joint first authors. Address correspondence to DK or LB

**Dylan Kneale**

EPPI-Centre, UCL Social Research Institute, 20 Bedford Way, London, WC1H 0AL

Email: [D.Kneale@ucl.ac.uk](mailto:D.Kneale@ucl.ac.uk)

**Laia Bécares**

School of Education and Social Work, Essex House, Falmer BN1 9QQ

Email: [L.Becares@sussex.ac.uk](mailto:L.Becares@sussex.ac.uk)

## Abstract

**Objectives:** To assess the mental health and experiences of discrimination amongst a sample of Lesbian, Gay, Bisexual, Transgender, Queer people (LGBTQ) during the COVID-19 pandemic.

**Design:** Data were collected through a cross-sectional survey targeted towards LGBTQ+ people. Data on mental health measures, experiences of discrimination and a number of other pandemic-related experiences were collected. Bivariate analyses were undertaken and regression models constructed; models were adjusted for a range of demographic and socioeconomic variables.

**Setting:** A web-based survey was used to collect data between the end of April and mid-July 2020.

**Participants:** A total of 398 LGBTQ+ respondents aged 18 and over.

**Main outcome measures:** We assessed mental health with the 4-item Perceived Stress Scale (PSS-4), and with the 10-item Center for Epidemiological Studies Depression scale (CES-D-10). We asked respondents about discriminatory experiences because of their LGBTQ+ identity during the coronavirus pandemic.

**Results:** Perceived stress scores among our LGBTQ+ sample were high (Mean: 7.67; Standard Deviation: 3.22). Based on a score of ten or over on the CES-D-10, the majority of participants had high levels of depressive symptoms (72%). Around one-in-six respondents reported some form of discrimination since the start of the pandemic because they were LGBTQ+ (16.7%). The average score for perceived stress increased by 1.44 points (95% Confidence Interval (CI): 0.517-2.354) for respondents who had experienced discrimination versus those who had not. Similarly, the odds of exhibiting significant depressive symptomatology increased three-fold among those who had experienced discrimination compared to those who had not (OR: 3.251; 95% CI: 1.168-9.052).

**Conclusions:** The coronavirus pandemic has had a detrimental impact on the mental health of the LGBTQ+ community. These associations were partially explained by experiences of discrimination which had a large, consistent and pernicious impact on stress and mental health.

**Keywords:** COVID-19; LGBTQ+; mental health; stress; discrimination.

### Article summary – strengths and limitations of this study

- This study provides an insight into the impacts of the coronavirus pandemic on LGBTQ+ mental health. Using validated tools, the study finds that the pandemic triggered very high levels of stress and depressive symptoms among LGBTQ+ people.
- An online convenience sample was deemed appropriate due to the absence of robust data on LGBTQ+ people from large surveys that could help to determine the characteristics of a representative sample of LGBTQ+ people. An online approach was particularly suitable for those respondents who may have been sheltering or shielding in households where their LGBTQ+ status was unknown to other members of the household.
- However, an online convenience sample can introduce potential issues around sample selection and the possibility that those living in stressful situations or with depressive symptoms were more likely to self-select into the survey.
- Due to relatively small sample sizes, we have not been able to fully examine the diversity of the LGBTQ+ community, and fully examine how experiences vary according to social locations such as ethnicity, age, and gender identity.
- The present study advances the argument for continued exploration of LGBTQ+ mental health through identifying not only high levels of mental health issues during the pandemic, but also demonstrating that sexuality- and gender-based discrimination is an important mediator.

## 1 Introduction

2 The coronavirus pandemic has exposed and magnified existent societal and health inequities  
3 operating across multiple and intersecting systems of oppression. Given documented stark  
4 health and socioeconomic inequalities across social locations related to sexuality, and gender  
5 expression and identity,<sup>1</sup> the coronavirus disease (COVID-19) and subsequent social and  
6 economic implications could be expected to disproportionately impact on Lesbian, Gay,  
7 Bisexual, Transgender, and Queer (LGBTQ+, the “plus” including those who don’t identify  
8 with any such label) people. To date there is a dearth of information on whether this is the  
9 case.

10  
11 Higher levels of pre-existing health conditions compared to cisgender and heterosexual  
12 populations, may place the LGBTQ+ community at additional risk of adverse prognosis. This  
13 includes long-term chronic illness, and higher rates of smoking and asthma among LGBTQ+  
14 people;<sup>2-5</sup> higher rates of obesity, and alcohol consumption among lesbian, bisexual, and  
15 queer women;<sup>5-7</sup> and increased likelihood of being immunocompromised (e.g. HIV+ with a  
16 low CD4 cell count or with untreated HIV) among gay men and transgender people.<sup>8</sup> In  
17 addition, the impacts of social distancing and lockdown may be felt acutely by LGBTQ+  
18 people, who even before the pandemic started, were at higher risk of poorer mental health as  
19 indicated by higher levels of suicide attempts and suicidal ideation, and lower levels of  
20 mental wellbeing.<sup>9 10</sup>

21  
22 Theoretical frameworks including the Minority Stress Model suggest that stark health  
23 inequalities are the result of distal and proximal stressors caused by living within a  
24 homophobic, heterosexist, transphobic culture, results in cumulative experiences of  
25 discrimination, harassment, victimization, expectations of rejection, and internalized

1 transphobia and homophobia.<sup>11 12</sup> These experiences have been extensively documented  
2 across several studies, where high prevalence of experiences of stigma and discrimination has  
3 been reported among the LGBTQ+ community.<sup>13 14</sup>

4  
5 Within the heterogeneous LGBTQ+ umbrella term, individual groups may be positioned at a  
6 distinct disadvantage. Transgender and gender-diverse (TGGD) individuals have a gender  
7 identity or expression that differs from the culturally-bound gender associated with one's  
8 assigned birth.<sup>15</sup> TGGD people are known to experience higher rates of adverse mental  
9 health compared to cisgender individuals (people whose gender identity or expression  
10 matches their sex assigned at birth), particularly anxiety, depression, and suicidality.<sup>3 4 16</sup>

11  
12 In the context of the coronavirus pandemic where existent inequalities are being exacerbated,  
13 it is paramount to document whether, and how, inequalities between the LGBTQ+  
14 community and heterosexual, cisgender individuals are being further amplified. The present  
15 study aims to address this need through analysing data from the Queerantime Study (a  
16 portmanteau Queer and Quarantine), a web-based survey that assesses how LGBTQ+ people  
17 are experiencing the coronavirus pandemic.

## 18 19 **Methods**

20 Data collection was conducted via a cross-sectional, web-based anonymous survey that began  
21 on 27 April 2020). Data for the present analyses were collected until 13 July 2020. The target  
22 sample included respondents aged 18 and over, and who self-identify as lesbian, gay,  
23 bisexual, transgender, queer, as having another minority sexual orientation, gender non-  
24 binary, or as intersex. Cisgender respondents who self-identify as heterosexual were not  
25 excluded from the survey, although recruitment and survey design were tailored towards the



1  
2  
3 1 LGBTQ+ community. The Queerantime survey asks respondents about their  
4  
5 2 sociodemographic characteristics, their physical and mental health, health behaviours, and  
6  
7 3 experiences and anxieties relating to the pandemic and their identity.  
8  
9  
10 4

## 11 12 5 **Patient and Public Involvement**

13  
14 6 Expert input broadened the focus to consider how respondents had experienced changes in  
15  
16 7 support from LGBTQ+ service providers and organisations; this input also helped to shape  
17  
18 8 the measures around gender identity. Community organisations also helped in the  
19  
20 9 dissemination of the study through social media and inclusion of the study within newsletters.  
21  
22 10 However, no further public involvement was sought in the design or analysis of the survey.  
23  
24  
25  
26 11

## 27 28 12 **Outcome variables**

29  
30 13 In this analysis we focus on three outcomes: depression, stress, and experiences of  
31  
32 14 discrimination. We assessed depression with the 10-item Center for Epidemiological Studies  
33  
34 15 Depression Scale (CES-D-10), which asks respondents to consider how much in the past  
35  
36 16 week they have experienced feelings of loneliness, happiness, and fear.<sup>17</sup> In total the scale  
37  
38 17 includes three items on depressed affect, five items on somatic symptoms, and two on  
39  
40 18 positive affect.<sup>18</sup> Scores range between 0 and 30, with thresholds used to denote ‘depressive  
41  
42 19 symptoms’ based on a score of ten or over<sup>17</sup>. In the present study we examine the CES-D-10  
43  
44 20 both as continuous (Cronbach’s  $\alpha=0.87$ ), and as a binary measure, with a cut-off of 10 or  
45  
46 21 more indicating significant depressive symptomology.  
47  
48 22 We measured stress with the 4-item Perceived Stress Scale (PSS-4), which assesses the extent  
49  
50 23 to which situations in life are viewed as stressful.<sup>19</sup> The scale asks respondents about their  
51  
52 24 ability to control important things in life, confidence in handling personal problems, the  
53  
54 25 extent to which they felt things were going their way, and whether difficulties were piling up  
55  
56  
57  
58  
59  
60

1 so high they were becoming insurmountable, using the past month as a frame of reference.  
2 Scores range between 0 and 15, and have good levels of internal consistency in our analytical  
3 sample (Cronbach's  $\alpha=0.83$ ).  
4 We measured experiences of discrimination with a set of questions that asked respondents  
5 whether, since the start of the coronavirus pandemic, they had experienced verbal  
6 harassment, physical harassment, sexual harassment, threats of violence, exclusion from  
7 events/activities, involuntary disclosure of LGBTQ+ identity, or other forms of inappropriate  
8 treatment because they were LGBTQ+ or were perceived as being LGBTQ+. Individual  
9 measures were combined into one summary variable of 'any discrimination.'

10

### 11 **Sexual orientation and gender identity or expression**

12 Gender identity was assessed using the recommended two-step method<sup>20</sup> with two items: (1)  
13 assigned sex at birth and (2) current gender identity. The two items were cross-tabulated to  
14 categorise participants as either TGGD or cisgender. Sexual orientation was captured with a  
15 question that asked participants to select their sexual orientation from the following  
16 categories: Bisexual; Gay/Lesbian; Heterosexual/Straight; Don't know; Prefer not to say; and  
17 an Other, free-text category.

18

19 We examine sexual orientation, and gender identity or expression as different constructs, and  
20 also combine both into a separate variable that examines the intersection of sexual orientation  
21 and gender identity or expression using five categories: (i) cisgender female lesbian/gay; (2)  
22 cisgender female other non-heterosexual (including bisexual, other, don't know, and prefer  
23 not to say); (3) transgender and gender diverse; (4) cisgender male gay; (5) cisgender male  
24 other non-heterosexual (including bisexual, other, don't know, and prefer not to say).

25

## 1 **Covariates**

2 We adjusted for variables thought to confound the association between our exposure and  
3 outcome variables. This included age, relationship status, ethnicity, and country of residence.  
4 We also controlled for socioeconomic status with a variable that asked respondents about  
5 their subjective social status (modelled on a validated approach <sup>21</sup>), and how this had changed  
6 since the start of the pandemic, with categories reflecting no change, positive change, and  
7 negative change.

## 8 **Analytical plan**

9 The analysis consisted of a complete case analysis of respondents. Summary statistics were  
10 calculated for baseline characteristics and associations between exposure variables and  
11 outcomes were tested in unadjusted analyses using the  $\chi^2$  test of association and ANOVA as  
12 appropriate. Ordinary Least Squares regression models were constructed for continuous  
13 models of stress and depression, and binary logistic regression models were constructed for  
14 high depressive symptomology. For models where depression or stress are the outcomes of  
15 interest, we used the measure of discrimination as the main exposure variable. For models  
16 where discrimination is the outcome of interest we only adjusted for sexual orientation,  
17 gender identity or expression, age, ethnicity, and location. Additional analysis examining  
18 when in the pandemic harassment and discrimination occurred is also included to  
19 contextualise the discussion. Adjusted and unadjusted models are presented. We conducted  
20 all analyses in Stata 14. <sup>22</sup>

## 21 **Results**

22  
23 Between April 27<sup>th</sup> and July 13<sup>th</sup>, a total of 426 responses were received. Of these 24 were  
24 excluded because they did not provide their age, and 4 were excluded because they were aged  
25

1 under 18. Of the remaining 398, we were able to calculate PSS-4 and CES-D-10 scores for  
2 325 and 324 respondents respectively. Once we had accounted for missingness on other  
3 covariates, the analytical sample consisted of 310 respondents for models of mental health,  
4 excluding one further cisgender heterosexual respondent.

5  
6 *TABLE 1 HERE*

7  
8 The analytical sample broadly mirrored the sociodemographic characteristics of the recent  
9 UK government National LGBT Survey.<sup>23</sup> The distribution of respondents by sexual  
10 orientation was very similar, albeit with a higher share of respondents who identified as  
11 Queer in the Queerantime survey (8% vs approximately 1%). The proportion of respondents  
12 aged 18-24 was lower at 15.1% (compared with approximately 37.4%), with higher  
13 proportions at older age groups in line with the UK population as a whole. Almost a quarter  
14 of the sample (23.5%) were categorised as TGGD, suggesting greater representation than in  
15 the UK National LGBT Survey sample where the proportion of TGGD respondents stood at  
16 approximately 15%.<sup>23</sup>  
17 Descriptively, the results suggested that the sample had high levels of stress and depression.  
18 The mean score for PSS-4 (Mean(M): 7.67; Standard Deviation (SD): 3.22) was higher than  
19 that observed in UK community samples in previous studies<sup>24</sup> and selected studies of sexual  
20 minorities conducted elsewhere.<sup>25</sup> Using the recommended threshold of 10 or more to  
21 identify depressive symptomatology, we observed high levels of respondents falling into this  
22 category (71.9%), a higher proportion than observed among other populations known to be  
23 susceptible to depression such as people living with HIV/AIDS.<sup>26</sup> Cis-female respondents  
24 who identify as gay or lesbian had the lowest scores for perceived stress or depressive

1 symptoms (see Table 1); conversely transgender and gender diverse individuals had the  
2 highest scores (83.6%).

3  
4 One-in-six respondents reported some form of harassment since the start of the pandemic  
5 because they were LGBTQ+ (16.7%); the most common forms being verbal harassment  
6 including insults or other hurtful comments (8.7%), exclusion from events or activities  
7 (5.6%), and involuntary disclosure of LGBTQ+ identity (3.5%). Stress was markedly higher  
8 for those who had experienced discrimination (PSS-4 M: 9.44 SD: 2.99) compared to those  
9 who had not (PSS-4 M: 7.35 SD: 3.16). Respondents who had experienced discrimination  
10 also had higher depression symptomology scores (CES-D-10 M: 17.87 SD: 6.21) compared  
11 to those who had not (CES-D-10 M: 13.43 SD: 6.97).

12  
13 *TABLE 2 HERE*

14  
15 We examined the relationship between gender identity and sexual orientation and  
16 discrimination in logistic regression models (see Table 2). Based on the association observed  
17 in Table 1, we used TGGD as the reference category and explored whether the higher risk of  
18 TGGD to experience discrimination remained after controlling for basic sociodemographic  
19 covariates. The results from adjusted models showed that the odds of experiencing  
20 discrimination were lower for all other groups, and significantly lower in the case of  
21 cisgender gay males (OR: 0.237, 95% Confidence Interval (CI):0.091-0.617) and cisgender  
22 females who identified with a sexual minority orientation other than gay/lesbian (OR: 0.361,  
23 CI: 0.141-0.921). Within the sample, the results were suggestive of a u-shaped trend in terms  
24 of age, with the youngest and the oldest LGBTQ+ respondents in the sample being at greatest

1 risk of experiencing discrimination, although differences by age were generally not  
2 statistically significant.

3  
4 Experiences of discrimination were clear predictors of poorer mental health. The average  
5 score for perceived stress increased by 1.44 points (CI: 0.517-2.354) for those who had  
6 experienced discrimination, compared to those who had not. Similarly, the odds of exhibiting  
7 significant depressive symptomology (CES-D-10 scores of 10 or more) increased three-fold  
8 among those who had experienced discrimination based on their gender or sexuality  
9 compared to those who had not (OR: 3.251; 95% CI: 1.168-9.052). These marked  
10 associations remained after adjusting for potential confounders (see Models 1 to 4 in Table  
11 3).

12  
13 *TABLE 3 HERE*

14  
15 Cisgender female lesbian or gay respondents had lower stress levels than other LGBTQ+  
16 groups. TGGD respondents and non-heterosexual cisgender males who identified as gay had  
17 among the highest average stress scores in adjusted models. Although a similar trend was  
18 observed in the odds of experiencing depressive symptomatology, the evidence was  
19 ultimately inconclusive. Further exploration of the CES-D-10 as a continuous measure (see  
20 appendix table) shows that TGGD had substantially higher CES-D-10 scores than cisgender  
21 lesbian or gay females, with an average score 3.38 points (95% CI: 1.172-5.595) higher after  
22 adjusting for other covariates. A clear trend by age was observed in models 3 and 4 (see  
23 Table 3), with younger respondents having significantly poorer mental health than older  
24 individuals, both for stress and significant depressive symptomology, after adjusting for other  
25 covariates.

1  
2  
3 1  
4  
5  
6 2 **Discussion**  
7 3  
8 4 In this study we present data on the levels of depression, stress, and experiences of  
9  
10 5 discrimination of LGBTQ+ people during the COVID-19 pandemic. We show that scores for  
11  
12 6 stress and depressive symptoms among our LGBTQ+ sample are high, and higher than  
13  
14 7 observed in community samples and vulnerable populations in the recent past (for example <sup>24</sup>  
15  
16 8 <sup>26</sup> ). Furthermore, the pandemic may not be impacting the LGBTQ+ acronym evenly, with  
17  
18 9 TGGD individuals having particularly high scores for stress and depressive symptoms  
19  
20 10 relative to cisgender gay and lesbian individuals. Non-heterosexual respondents who are  
21  
22 11 cisgender but do not identify as lesbian or gay also had elevated scores for stress and  
23  
24 12 depressive symptoms. Similarly, there was a clear age gradient with younger LGBTQ+  
25  
26 13 people having much higher risks of showing symptoms of stress and depression.  
27  
28  
29  
30  
31 14  
32  
33 15 Our analyses of discrimination reinforce the theoretical basis for undertaking analyses of  
34  
35 16 LGBTQ+ health and mental health, with LGBTQ+ people theorised at greater risk of health  
36  
37 17 complications due to a unique set of internal and external homophobic, heteronormative, and  
38  
39 18 transphobic stressors. <sup>27</sup> We found that almost one-in-five respondents reported experiencing  
40  
41 19 some form of discrimination during the pandemic, with TGGD respondents again at  
42  
43 20 heightened risk of experiencing discrimination relative to other LGBTQ+ groups. Our results  
44  
45 21 show that experiencing discrimination was a risk factor for higher stress and depressive  
46  
47 22 symptomology; the odds of reporting depressive symptomatology among individuals who  
48  
49 23 had experienced discrimination were three times higher than among individuals who had not  
50  
51 24 experienced any discrimination. Open ended responses to the survey described various  
52  
53 25 experiences of discrimination and inappropriate incidents including increased or excessive  
54  
55 26 scrutiny, misgendering, and online abuse.  
56  
57  
58  
59  
60

1  
2  
3 1  
4  
5 2 To further understand the results, we explored how mental health and discrimination varied  
6  
7 3 over the course of the pandemic. We observed that mental health scores in the sample were  
8  
9 4 poorer during the period April 27<sup>th</sup>-May 10<sup>th</sup> (the moment of ‘maximum risk’ as defined by  
10  
11 5 the UK Prime Minister) and during the period between May 23<sup>rd</sup>-June 14<sup>th</sup> (coinciding with  
12  
13 6 revelations of lockdown breaches by government officials in the UK, transphobic comments  
14  
15 7 on social media made by high profile people, and protests surrounding the murder of George  
16  
17 8 Floyd), although these differences were not significant. Similarly, we observed non-  
18  
19 9 statistically significant differences in the proportion of respondents reporting instances of  
20  
21 10 discrimination, with the initial easing of the lockdown and particularly the period from June  
22  
23 11 15<sup>th</sup> onwards coinciding with increases in discrimination (see Figure 1), albeit based on a  
24  
25 12 small sample in the latter period.  
26  
27  
28  
29  
30  
31  
32

33 14 *FIGURE 1 HERE*  
34  
35  
36

### 37 16 **Limitations**

38  
39 17 Due to relatively small sample sizes, we have not been able to fully examine the diversity of  
40  
41 18 the LGBTQ+ community, and fully examine how experiences vary according to social  
42  
43 19 locations such as ethnicity, age, and gender identity. Studies in the US show that the highest  
44  
45 20 levels of violence are reported among transgender women of colour, and among young and  
46  
47 21 low-income transgender people,<sup>13 14</sup> suggesting that violence on the basis of transgender  
48  
49 22 identity or expression often affects the most marginalized subpopulations. Although we have  
50  
51 23 adjusted for these factors in our models, we have not been able to further disaggregate across  
52  
53 24 social locations to examine the role of interlocking systems of oppression in patterning  
54  
55 25 experiences of discrimination and adverse mental health.  
56  
57  
58  
59  
60



1  
2  
3 1 While our data collection efforts are limited by the inherent challenge of surveying a small,  
4  
5 2 dispersed, diverse, and difficult to reach population, it is nonetheless critically important to  
6  
7 3 study the lives and experiences of discrimination and mental health among LGBTQ+  
8  
9 4 communities because of the stark health and social inequalities they experience.  
10  
11  
12 5 New purposeful data collection was deemed appropriate as although a number of large  
13  
14 6 representative studies (e.g. the UK Household Longitudinal Study) are currently collecting  
15  
16 7 data on COVID-19 experiences, they typically contain small numbers of LGBTQ+ people, <sup>6</sup>  
17  
18 8 <sup>10</sup> often do not collect information on TGGD identities, and contain heteronormative  
19  
20 9 measures that can be exclusionary to LGBTQ+ respondents. An online convenience sample  
21  
22 10 was deemed appropriate due to the absence of robust data on LGBTQ+ people from large  
23  
24 11 surveys that could help to determine the characteristics of a representative sample of  
25  
26 12 LGBTQ+ people. An online approach was particularly suitable for those respondents who  
27  
28 13 may have been sheltering or shielding in households where their LGBTQ+ status was  
29  
30 14 unknown to other members of the household. Furthermore, this approach is in line with other  
31  
32 15 recent large scale efforts at understanding the health of LGBT people in the UK. <sup>23</sup> We do,  
33  
34 16 nevertheless, acknowledge that an online convenience sample can introduce potential issues  
35  
36 17 around sample selection and the possibility that those living in stressful situations or with  
37  
38 18 depressive symptoms were more likely to self-select into the survey.  
39  
40  
41  
42  
43  
44  
45  
46

## 47 **Public Health Implications**

48  
49 21 Results from the Queerantime Study suggest that groups within LGBTQ+ acronym may be at  
50  
51 22 differential risk of exhibiting stress or depressive symptomology, although the sample as a  
52  
53 23 whole may also be at higher risk than the general population of stress and depressive  
54  
55 24 symptomology due to minority stress. Homophobic and transphobic harassment and  
56  
57 25 exclusion experienced during the pandemic has a deleterious impact on LGBTQ+ mental  
58  
59  
60

1 health, demonstrated by the strong and consistent associations between harassment and  
2 poorer mental health in the models. Open-ended responses to survey questions emphasise the  
3 importance of LGBTQ+ social networks, often facilitated by the work of LGBTQ+  
4 organisations, in supporting LGBTQ+ individuals. However, these are the very organisations  
5 who are facing financial challenges with many now on the brink of closure.<sup>28</sup>

6  
7 Globally, LGBT+ rights organisations have alerted policy-makers about the need to address  
8 the vulnerability of the LGBTQ+ community to the coronavirus pandemic, including  
9 collecting sexual orientation and gender identity data for COVID-19 cases, increased  
10 socioeconomic support for disadvantaged individuals, and support for organisations working  
11 with the community.<sup>29</sup> Our findings provide support to these demands given the documented  
12 high prevalence of depression and stress, and the concerning reports of experiences of  
13 discrimination. Poor LGBTQ+ mental health may remain unchecked without substantial  
14 commitment and funding directed to ameliorating health inequalities exacerbated by the  
15 pandemic.

### 16 17 **Contributors**

18 DK and LB are equal contributors to this study. Both designed the Queerantime survey,  
19 developed the research focus, analysed the data, and drafted and edited the manuscript. DK  
20 and LB are the guarantors for this study and gave full approval of this version to be  
21 published.

### 22 23 **Data sharing statement**

24 No additional data are available.

25

## 1 **Ethical approval**

2 Ethical approval was obtained from the ethics board of the University of Sussex  
3 (ER/LB516/4) and University College London (REC 1335).  
4

## 5 **Funding**

6 This research received no specific grant from any funding agency in the public, commercial  
7 or not-for-profit sectors.  
8

## 9 **Acknowledgments**

10 We would like to thank the participants of the #Queerantime Study for sharing their  
11 experiences with us. We would also like to thank Harri Weeks and the National LGB&T  
12 Partnership for their advice and to all those who have helped to promote the study through  
13 social media and in other ways. We would also like to thank Joanna Boyce for contributing  
14 social media expertise that helped to boost the response rate.  
15  
16  
17  
18  
19  
20  
21  
22  
23  
24  
25  
26  
27  
28  
29  
30  
31  
32  
33  
34  
35  
36  
37  
38  
39  
40  
41  
42  
43  
44  
45  
46  
47  
48  
49  
50  
51  
52  
53  
54  
55  
56  
57  
58  
59  
60

## References

1. Zeeman L, Sherriff N, Browne K, et al. A review of lesbian, gay, bisexual, trans and intersex (LGBTI) health and healthcare inequalities. *European journal of public health* 2019;29(5):974–80.
2. Conron K, Mimiaga M, Landers S. A population-based study of sexual orientation identity and gender differences in adult health. *American Journal of Public Health* 2010;100(10):1953-60.
3. Hudson-Sharp N, Metcalf H. Inequality among lesbian, gay bisexual and transgender groups in the UK: a review of evidence. London: National Institute of Economic and Social Research, 2016.
4. Reisner SL, Poteat T, J. K, et al. Global health burden and needs of transgender populations: a review. *The Lancet* 2016;388(10042):412-36.
5. Shahab L, Brown J, Hagger-Johnson G, et al. Sexual orientation identity and tobacco and hazardous alcohol use: findings from a cross-sectional English population survey. *BMJ Open* 2017;7:e015058.
6. Bécares L. Health and socio-economic inequalities by sexual orientation among older women in the United Kingdom: Findings from the UK Household Longitudinal Study. *Ageing and Society* 2020;1-19. doi: doi:10.1017/S0144686X20000367
7. Semlyen J, Curtis T, Varney J. Sexual orientation identity in relation to unhealthy Body Mass Index (BMI): Individual Participant Meta-Analysis of 93,429 individuals from 12 UK health surveys. *Journal of Public Health* 2019;fdy224
8. Herbst J, Jacobs E, Finlayson T, et al. Estimating HIV prevalence and risk behaviors of transgender persons in the United States: A systematic review. *AIDS and Behavior* 2008;12:1-17.
9. Fredriksen-Goldsen K, Kim H, Bryan A, et al. The cascading effects of marginalization and pathways of resilience in attaining good health among LGBT older adults. *The Gerontologist* 2017;57(suppl\_1): S72-S83.
10. Kneale D, Thomas J, French R. Inequalities in health and care among Lesbian, Gay and Bisexual people aged 50 and over in the United Kingdom: A systematic review and meta-analysis of sources of individual participant data. *The Journals of Gerontology: Series B* 2020:gbaa071. doi: doi.org/10.1093/geronb/gbaa071
11. Hendricks M, Testa R. A conceptual framework for clinical work with transgender and gender nonconforming clients: An adaptation of the Minority Stress Model. *Professional Psychology: Research and Practice* 2012;43(5):460-67.
12. Meyer IH. Prejudice, social stress, and mental health in lesbian, gay, and bisexual populations: conceptual issues and research evidence. *Psychological bulletin* 2003;129(5):674-97.
13. Bradford J, Reisner SL, Honnold JA, et al. Experiences of transgender-related discrimination and implications for health: results from the Virginia Transgender Health Initiative Study. *American Journal of Public Health* 2013;103(10):1820-29.
14. White Hughto JM, Reisner SL, Pachankis JE. Transgender stigma and health: A critical review of stigma determinants, mechanisms, and interventions. *Social Science and Medicine* 2015;147:222-31.
15. Davidson M. Seeking refuge under the umbrella: Inclusion, exclusion, and organizing within the category transgender. . *Sexuality Research & Social Policy* 2007;4(4):60-80.
16. Meyer IH, Brown TN, Herman JL, et al. Demographic Characteristics and Health Status of Transgender Adults in Select US Regions: Behavioral Risk Factor Surveillance System, 2014. *American Journal of Public Health* 2016;107(4):582-89.
17. Andresen EM, Malmgren JA, Carter WB, et al. Screening for depression in well older adults: Evaluation of a short form of the CES-D. *American journal of preventive medicine* 1994;10(2):77-84.
18. Baron EC, Davies T, Lund C. Validation of the 10-item centre for epidemiological studies depression scale (CES-D-10) in Zulu, Xhosa and Afrikaans populations in South Africa. *BMC psychiatry* 2017;17(1):6.

- 1  
2  
3 1 19. Cohen S, Kamarck T, Mermelstein R. A global measure of perceived stress. *Journal of health and*  
4 2 *social behavior* 1983;385-96.  
5 3  
6 4 20. The GenIUSS Group. Best Practices for Asking Questions to Identify Transgender and Other  
7 4 Gender Minority Respondents on Population-Based Surveys. Los Angeles, CA: The Williams  
8 5 Institute, 2014.  
9 6 21. Singh-Manoux A, Adler NE, Marmot MG. Subjective social status: its determinants and its  
10 7 association with measures of ill-health in the Whitehall II study. *Social science & medicine*  
11 8 2003;56(6):1321-33.  
12 9  
13 10 22. Stata Statistical Software: Release 14 [program]. College Station, TX: StataCorp LP, 2015.  
14 11  
15 12 23. Government Equalities Office. National LGBT survey. Manchester: Government Equalities Office  
16 12 2018.  
17 13 24. Warttig SL, Forshaw MJ, South J, et al. New, normative, English-sample data for the short form  
18 14 perceived stress scale (PSS-4). *Journal of health psychology* 2013;18(12):1617-28.  
19 15 25. Tatum AK, Ross MW. A longitudinal analysis of sexual minorities' acceptance concerns and  
20 16 internalized homonegativity on perceived psychological stress. *Psychology & Sexuality* 2020  
21 17 26. Zhang W, O'Brien N, Forrest JI, et al. Validating a shortened depression scale (10 item CES-D)  
22 18 among HIV-positive people in British Columbia, Canada. *PloS one* 2012;7(7):e40793.  
23 19 27. Frost DM, Lehavot K, Meyer IH. Minority stress and physical health among sexual minority  
24 20 individuals. *Journal of behavioral medicine* 2015;38(1):1-8. doi: 10.1007/s10865-013-9523-8  
25 21 28. LGBT Consortium. The impact of COVID-19 on LGBT+ service delivery. London: LGBT Consortium,  
26 22 2020.  
27 23 29. National LGBT Cancer Network. Open Letter about Coronavirus and the LGBTQ+ Communities.  
28 24 Over 100 Organizations Ask Media & Health Officials to Weigh Added Risk. In: Network  
29 25 TNLC, ed. New York, NY, 2020.  
30  
31 26  
32 27  
33 28  
34 29  
35 30  
36 31  
37 32  
38 33  
39 34  
40 35  
41 36  
42 37  
43 38  
44 39  
45 40  
46 41  
47 42  
48 43  
49 44  
50 45  
51 46  
52 47  
53 48  
54 49  
55 50  
56 51  
57 52  
58 53  
59 54  
60 55

## 1 Tables and Figures

2 **Table 1: Mental health, experiences of discrimination, and sociodemographic**  
3 **characteristics of the Queerantime Study respondents**

|                                                           | Cis female<br>Gay/Lesbian | Cis female<br>bisexual/<br>other/ don't<br>know/<br>prefer not<br>to say | Trans-<br>gender<br>and<br>Gender<br>Diverse<br>(TGGD) | Cis male<br>Gay | Cis male<br>bisexual/<br>other/don't<br>know/<br>prefer not<br>to say | Total             |
|-----------------------------------------------------------|---------------------------|--------------------------------------------------------------------------|--------------------------------------------------------|-----------------|-----------------------------------------------------------------------|-------------------|
|                                                           | %                         | %                                                                        | %                                                      | %               | %                                                                     | %                 |
| <b>Mental health outcomes</b>                             |                           |                                                                          |                                                        |                 |                                                                       |                   |
| PSS-4 Score,<br>M(SD)                                     | 6.44<br>(3.18)            | 8.33<br>(3.14)                                                           | 8.96<br>(2.99)                                         | 7.03<br>(2.97)  | 9.00<br>(3.37)                                                        | 7.672<br>(3.218)  |
| CES-D-10,<br>M(SD)                                        | 12.0<br>(6.65)            | 15.0<br>(5.86)                                                           | 17.15<br>(6.6)                                         | 12.75<br>(7.17) | 16.15<br>(7.5)                                                        | 14.174<br>(6.948) |
| <b>Depressive<br/>Symptomology</b>                        |                           |                                                                          |                                                        |                 |                                                                       |                   |
| No evidence (<10)                                         | 36.62                     | 18.33                                                                    | 16.44                                                  | 38.71           | 15.38                                                                 | 28.06             |
| Evidence of depressive<br>symptomology (≥10)              | 63.38                     | 81.67                                                                    | 83.56                                                  | 61.29           | 84.62                                                                 | 71.94             |
| <b>Any harassment or<br/>inappropriate incidents</b>      |                           |                                                                          |                                                        |                 |                                                                       |                   |
| None reported                                             | 74.65                     | 81.67                                                                    | 64.38                                                  | 87.10           | 84.62                                                                 | 77.81             |
| Harassment reported                                       | 19.72                     | 13.33                                                                    | 28.77                                                  | 7.53            | 15.38                                                                 | 16.72             |
| No information                                            | 5.63                      | 5.00                                                                     | 6.85                                                   | 5.38            | 0                                                                     | 5.47              |
| <b>Age Group</b>                                          |                           |                                                                          |                                                        |                 |                                                                       |                   |
| 18-24                                                     | 9.86                      | 18.33                                                                    | 31.51                                                  | 2.15            | 30.77                                                                 | 15.11             |
| 25-34                                                     | 18.31                     | 45.00                                                                    | 31.51                                                  | 32.26           | 23.08                                                                 | 30.87             |
| 35-44                                                     | 39.44                     | 23.33                                                                    | 16.44                                                  | 31.18           | 23.08                                                                 | 27.65             |
| 45-54                                                     | 23.94                     | 10.00                                                                    | 16.44                                                  | 23.66           | 15.38                                                                 | 19.29             |
| 55+                                                       | 8.45                      | 3.33                                                                     | 4.11                                                   | 10.75           | 7.69                                                                  | 7.07              |
| <b>Change in perceived<br/>social status</b>              |                           |                                                                          |                                                        |                 |                                                                       |                   |
| Negative change in status                                 | 25.35                     | 26.67                                                                    | 36.99                                                  | 23.66           | 23.08                                                                 | 27.65             |
| No change                                                 | 52.11                     | 43.33                                                                    | 35.62                                                  | 51.61           | 61.54                                                                 | 46.95             |
| Positive change                                           | 22.54                     | 30.00                                                                    | 27.40                                                  | 24.73           | 15.38                                                                 | 25.40             |
| Total                                                     |                           |                                                                          |                                                        |                 |                                                                       | 100.00            |
| <b>Relationship status</b>                                |                           |                                                                          |                                                        |                 |                                                                       |                   |
| Single                                                    | 21.13                     | 25.00                                                                    | 42.47                                                  | 19.35           | 23.08                                                                 | 26.37             |
| Dating or in a<br>relationship but not<br>living together | 21.13                     | 30.00                                                                    | 19.18                                                  | 26.88           | 46.15                                                                 | 25.08             |
| Cohabiting/Married/Civil<br>Partnership                   | 56.34                     | 45.00                                                                    | 34.25                                                  | 49.46           | 30.77                                                                 | 45.98             |
| Divorced, Widowed or<br>Prefer Not to Say                 | 1.41                      | 0                                                                        | 4.11                                                   | 4.30            | 0                                                                     | 2.57              |
| <b>Identify as ethnic<br/>minority</b>                    |                           |                                                                          |                                                        |                 |                                                                       |                   |
| Not an ethnic minority                                    | 87.32                     | 81.67                                                                    | 90.41                                                  | 83.87           | 76.92                                                                 | 85.53             |
| Ethnic minority                                           | 12.68                     | 16.67                                                                    | 9.59                                                   | 12.90           | 23.08                                                                 | 13.18             |
| Prefer Not to Say                                         | 0                         | 1.67                                                                     | 0                                                      | 3.23            | 0                                                                     | 1.29              |
| <b>Location</b>                                           |                           |                                                                          |                                                        |                 |                                                                       |                   |
| UK                                                        | 81.69                     | 80.00                                                                    | 82.19                                                  | 90.32           | 76.92                                                                 | 83.60             |
| Rest of the world                                         | 18.31                     | 20.00                                                                    | 17.81                                                  | 9.68            | 23.08                                                                 | 16.40             |
| <b>Total (%)</b>                                          | <b>100.00</b>             | <b>100.00</b>                                                            | <b>100.00</b>                                          | <b>100.00</b>   | <b>100.00</b>                                                         | <b>100.00</b>     |
| <b>Total (N)</b>                                          | <b>71</b>                 | <b>60</b>                                                                | <b>73</b>                                              | <b>93</b>       | <b>13</b>                                                             | <b>310</b>        |

**Table 2: Logistic regression results for unadjusted and adjusted associations between gender identity/sexual orientation and discrimination during COVID-19 pandemic (Odds ratios and exponentiated standard errors in brackets)**

|                                                                               | Experiences of discrimination |                     |
|-------------------------------------------------------------------------------|-------------------------------|---------------------|
|                                                                               | Model 1                       | Model 2             |
|                                                                               | O.R.<br>(SE)                  | O.R.<br>(SE)        |
| <b>Gender ID and Sex Orientation baseline: Transgender and gender diverse</b> |                               |                     |
| Cis female Gay/Lesbian                                                        | 0.576<br>(0.228)              | 0.743<br>(0.320)    |
| Cis female Bisexual/other/don't know/prefer not to say                        | 0.364**<br>(0.167)            | 0.361**<br>(0.172)  |
| Cis male gay                                                                  | 0.218***<br>(0.0985)          | 0.237***<br>(0.116) |
| Cis male Bisexual/other/don't know/prefer not to say                          | 0.364<br>(0.293)              | 0.334<br>(0.278)    |
| <b>Age group baseline: 18-24 years</b>                                        |                               |                     |
| 25-34 years                                                                   |                               | 0.981<br>(0.436)    |
| 35-44 years                                                                   |                               | 0.302**<br>(0.168)  |
| 45-54 years                                                                   |                               | 0.409<br>(0.225)    |
| 55+ years                                                                     |                               | 1.567<br>(0.957)    |
| <b>Ethnic minority (baseline: not an ethnic minority)</b>                     |                               |                     |
|                                                                               |                               | 1.345<br>(0.653)    |
| <b>Location: Rest of the world (baseline: UK)</b>                             |                               |                     |
|                                                                               |                               | 0.530<br>(0.258)    |
| Observations                                                                  | 295                           | 295                 |

\*\*\* p<0.01, \*\* p<0.05, \* p<0.1

**Table 3: Results of unadjusted and adjusted OLS Regression for PSS-4 score (Models 1 and 2; regression coefficients and standard errors in brackets) and unadjusted and adjusted logistic regression results for odds of significant depressive symptomatology indicated by CES-D-10 scores  $\geq 10$  (Models 3 and 4; odds ratios and exponentiated standard errors in brackets)**

|                                                                         | Model 1             | Model 2              | Model 3             | Model 4            |
|-------------------------------------------------------------------------|---------------------|----------------------|---------------------|--------------------|
|                                                                         | B(SE)               | B(SE)                | B(SE)               | B(SE)              |
| <b>Any harassment or inappropriate incidents baseline: None</b>         |                     |                      |                     |                    |
| Form of harassment reported                                             | 1.882***<br>(0.470) | 1.436***<br>(0.467)  | 4.228***<br>(2.120) | 3.252**<br>(1.699) |
| No information                                                          | -0.378<br>(0.755)   | -0.756<br>(0.733)    | 2.325<br>(1.541)    | 1.796<br>(1.256)   |
| <b>Gender ID and Sex Orientation baseline: Cis female Gay/Lesbian</b>   |                     |                      |                     |                    |
| Cis female Bisexual/other/don't know/prefer not to say                  | 2.014***<br>(0.527) | 1.367***<br>(0.519)  | 2.881**<br>(1.219)  | 2.154*<br>(0.971)  |
| Transgender and gender diverse                                          | 2.357***<br>(0.502) | 1.561***<br>(0.504)  | 2.748**<br>(1.126)  | 1.904<br>(0.853)   |
| Cis male gay                                                            | 0.824*<br>(0.476)   | 0.769*<br>(0.464)    | 1.061<br>(0.355)    | 0.986<br>(0.355)   |
| Cis male Bisexual/other/don't know/prefer not to say                    | 2.624***<br>(0.906) | 1.982**<br>(0.878)   | 3.626<br>(2.961)    | 2.553<br>(2.175)   |
| <b>Age group baseline: 18-24 years</b>                                  |                     |                      |                     |                    |
| 25-34 years                                                             |                     | -1.070**<br>(0.537)  |                     | 0.558<br>(0.319)   |
| 35-44 years                                                             |                     | -1.995***<br>(0.558) |                     | 0.480<br>(0.274)   |
| 45-54 years                                                             |                     | -2.401***<br>(0.596) |                     | 0.309**<br>(0.181) |
| 55+ years                                                               |                     | -3.384***<br>(0.774) |                     | 0.361<br>(0.258)   |
| <b>Change in social status since pandemic baseline: positive change</b> |                     |                      |                     |                    |
| Negative change in status                                               |                     | 1.375***<br>(0.456)  |                     | 1.653<br>(0.670)   |
| No change                                                               |                     | 0.217<br>(0.410)     |                     | 0.882<br>(0.300)   |
| <b>Relationship status baseline: Single</b>                             |                     |                      |                     |                    |
| Dating or in a relationship but not living together                     |                     | 0.225<br>(0.461)     |                     | 0.953<br>(0.409)   |



|                                                   |          |          |         |
|---------------------------------------------------|----------|----------|---------|
| Cohabiting/Married/Civil Partner                  | -0.332   |          | 0.499*  |
|                                                   | (0.420)  |          | (0.182) |
| Divorced, Widowed or Prefer not to say            | -0.328   |          | 0.625   |
|                                                   | (1.085)  |          | (0.529) |
| <b>Ethnicity baseline: not an ethnic minority</b> |          |          |         |
| Ethnic Minority                                   | -0.378   |          | 1.525   |
|                                                   | (0.495)  |          | (0.674) |
| Prefer not to say                                 | 1.621    |          | 1.778   |
|                                                   | (1.470)  |          | (2.189) |
| <b>Location: Rest of the world (baseline: UK)</b> |          |          |         |
|                                                   | -0.0235  |          | 1.076   |
|                                                   | (0.454)  |          | (0.425) |
| Constant                                          | 6.087*** | 7.774*** |         |
|                                                   | (0.372)  | (0.688)  |         |
| Observations                                      | 310      | 310      | 310     |
| R-squared                                         | 0.147    | 0.263    |         |

\*\*\* p<0.01, \*\* p<0.05, \* p<0.1

Figure 1: Proportion of respondents reporting discrimination by period in the pandemic

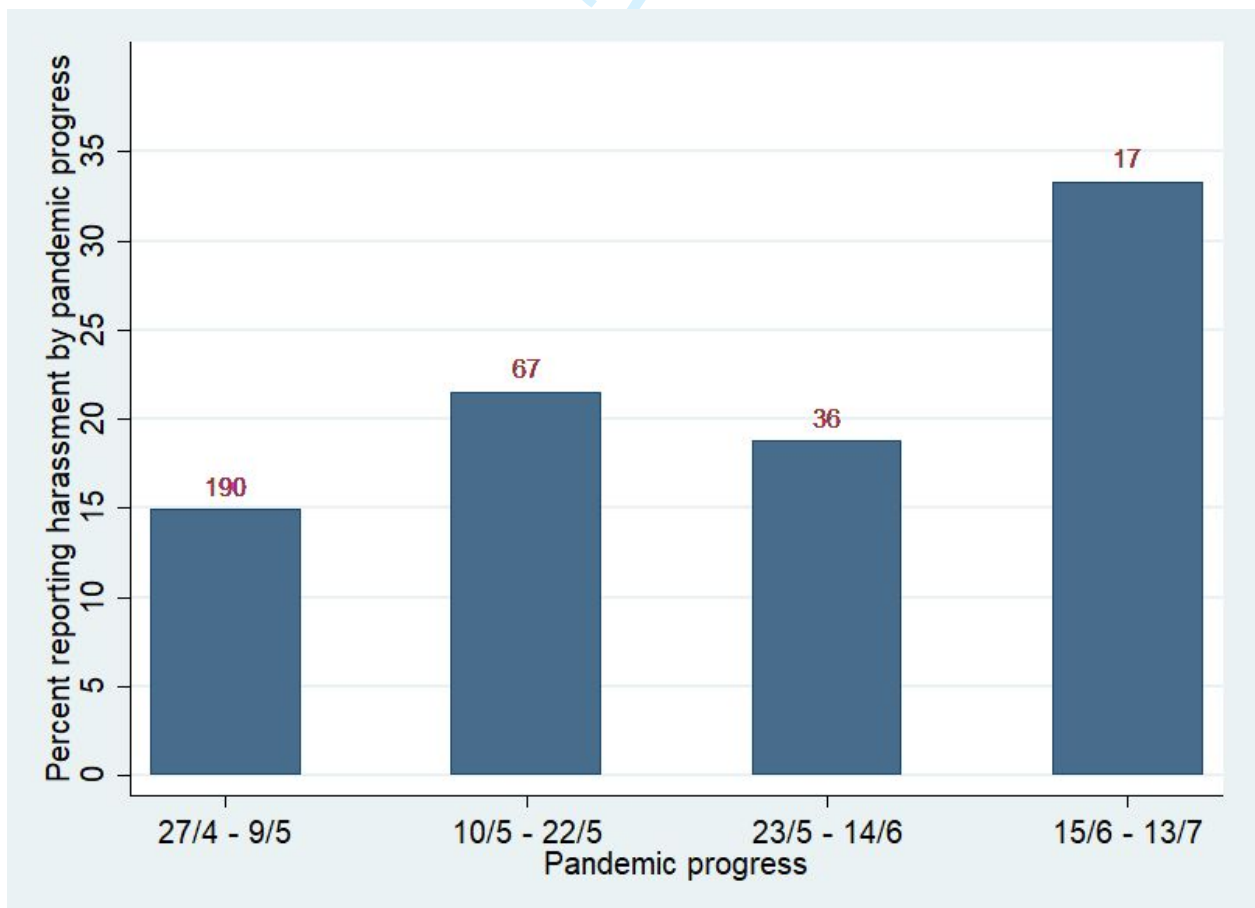

1

2 **Supplementary Table 1 – Continuous model estimates of CES-D-10**

|                                                                             | Model 1             | Model 2              |
|-----------------------------------------------------------------------------|---------------------|----------------------|
|                                                                             | B(SE)               | B(SE)                |
| Any harassment or inappropriate incidents baseline: None                    |                     |                      |
| Form of harassment reported                                                 | 3.875***<br>(1.028) | 2.700**<br>(1.045)   |
| No information                                                              | 0.257<br>(1.651)    | -0.623<br>(1.641)    |
| <b>Gender ID and Sex Orientation baseline: Cis female<br/>Gay/Lesbian</b>   |                     |                      |
| Cis female Bisexual/other/don't know/prefer not to say                      | 3.249***<br>(1.153) | 2.132*<br>(1.162)    |
| Transgender and gender diverse                                              | 4.797***<br>(1.098) | 3.383***<br>(1.128)  |
| Cis male gay                                                                | 1.226<br>(1.042)    | 1.027<br>(1.040)     |
| Cis male Bisexual/other/don't know/prefer not to say                        | 4.336**<br>(1.983)  | 2.781<br>(1.965)     |
| <b>Age group baseline: 18-24 years</b>                                      |                     |                      |
| 25-34 years                                                                 |                     | -1.932<br>(1.203)    |
| 35-44 years                                                                 |                     | -2.899**<br>(1.250)  |
| 45-54 years                                                                 |                     | -4.453***<br>(1.335) |
| 55+ years                                                                   |                     | -3.974**<br>(1.733)  |
| <b>Change in social status since pandemic baseline:<br/>positive change</b> |                     |                      |
| Negative change in status                                                   |                     | 2.649***<br>(1.021)  |
| No change                                                                   |                     | 0.746<br>(0.919)     |
| <b>Relationship status baseline: Single</b>                                 |                     |                      |
| Dating or in a relationship but not living together                         |                     | 0.440<br>(1.032)     |
| Cohabiting/Married/Civil Partner                                            |                     | -1.979**<br>(0.941)  |
| Divorced, Widowed or Prefer not to say                                      |                     | 0.416<br>(2.429)     |
| <b>Ethnicity baseline: not an ethnic minority</b>                           |                     |                      |
| Ethnic Minority                                                             |                     | 0.404<br>(1.109)     |
| Prefer not to say                                                           |                     | 1.076                |

1  
2  
3  
4  
5  
6  
7  
8  
9  
10  
11  
12  
13  
14  
15  
16  
17  
18  
19  
20  
21  
22  
23  
24  
25  
26  
27  
28  
29  
30  
31  
32  
33  
34  
35  
36  
37  
38  
39  
40  
41  
42  
43  
44  
45  
46  
47  
48  
49  
50  
51  
52  
53  
54  
55  
56  
57  
58  
59  
60

|                                                   |          |          |  |
|---------------------------------------------------|----------|----------|--|
|                                                   |          | (3.292)  |  |
| <b>Location: Rest of the world (baseline: UK)</b> |          | -0.0193  |  |
|                                                   |          | (1.016)  |  |
| Constant                                          | 11.22*** | 14.31*** |  |
|                                                   | (0.813)  | (1.540)  |  |
| Observations                                      | 310      | 310      |  |
| R-squared                                         | 0.126    | 0.208    |  |

\*\*\* p<0.01, \*\* p<0.05, \* p<0.1

For peer review only

STROBE Statement—Checklist of items that should be included in reports of *cross-sectional studies*

|                              | Item No | Recommendation                                                                                                                                                                                    | Page No  |
|------------------------------|---------|---------------------------------------------------------------------------------------------------------------------------------------------------------------------------------------------------|----------|
| <b>Title and abstract</b>    | 1       | (a) Indicate the study's design with a commonly used term in the title or the abstract                                                                                                            | 1        |
|                              |         | (b) Provide in the abstract an informative and balanced summary of what was done and what was found                                                                                               | 2        |
| <b>Introduction</b>          |         |                                                                                                                                                                                                   |          |
| Background/rationale         | 2       | Explain the scientific background and rationale for the investigation being reported                                                                                                              | 3-4      |
| Objectives                   | 3       | State specific objectives, including any prespecified hypotheses                                                                                                                                  | 4-5      |
| <b>Methods</b>               |         |                                                                                                                                                                                                   |          |
| Study design                 | 4       | Present key elements of study design early in the paper                                                                                                                                           | 5-8      |
| Setting                      | 5       | Describe the setting, locations, and relevant dates, including periods of recruitment, exposure, follow-up, and data collection                                                                   | 5        |
| Participants                 | 6       | (a) Give the eligibility criteria, and the sources and methods of selection of participants                                                                                                       | 5        |
| Variables                    | 7       | Clearly define all outcomes, exposures, predictors, potential confounders, and effect modifiers. Give diagnostic criteria, if applicable                                                          | 5-7      |
| Data sources/<br>measurement | 8*      | For each variable of interest, give sources of data and details of methods of assessment (measurement). Describe comparability of assessment methods if there is more than one group              | 5-7      |
| Bias                         | 9       | Describe any efforts to address potential sources of bias                                                                                                                                         | 8        |
| Study size                   | 10      | Explain how the study size was arrived at                                                                                                                                                         | 8        |
| Quantitative variables       | 11      | Explain how quantitative variables were handled in the analyses. If applicable, describe which groupings were chosen and why                                                                      | 8        |
| Statistical methods          | 12      | (a) Describe all statistical methods, including those used to control for confounding                                                                                                             | 8        |
|                              |         | (b) Describe any methods used to examine subgroups and interactions                                                                                                                               |          |
|                              |         | (c) Explain how missing data were addressed                                                                                                                                                       | 8        |
|                              |         | (d) If applicable, describe analytical methods taking account of sampling strategy                                                                                                                |          |
|                              |         | (e) Describe any sensitivity analyses                                                                                                                                                             | 6        |
| <b>Results</b>               |         |                                                                                                                                                                                                   |          |
| Participants                 | 13*     | (a) Report numbers of individuals at each stage of study—eg numbers potentially eligible, examined for eligibility, confirmed eligible, included in the study, completing follow-up, and analysed | 8        |
|                              |         | (b) Give reasons for non-participation at each stage                                                                                                                                              | 8        |
|                              |         | (c) Consider use of a flow diagram                                                                                                                                                                |          |
| Descriptive data             | 14*     | (a) Give characteristics of study participants (eg demographic, clinical, social) and information on exposures and potential confounders                                                          | 9, 23-24 |
|                              |         | (b) Indicate number of participants with missing data for each variable of interest                                                                                                               | 8        |
| Outcome data                 | 15*     | Report numbers of outcome events or summary measures                                                                                                                                              | 9, 23-24 |

1  
2  
3  
4  
5  
6  
7  
8  
9  
10  
11  
12  
13  
14  
15  
16  
17  
18  
19  
20  
21  
22  
23  
24  
25  
26  
27  
28  
29  
30  
31  
32  
33  
34  
35  
36  
37  
38  
39  
40  
41  
42  
43  
44  
45  
46  
47  
48  
49  
50  
51  
52  
53  
54  
55  
56  
57  
58  
59  
60

|                          |    |                                                                                                                                                                                                              |              |
|--------------------------|----|--------------------------------------------------------------------------------------------------------------------------------------------------------------------------------------------------------------|--------------|
| Main results             | 16 | (a) Give unadjusted estimates and, if applicable, confounder-adjusted estimates and their precision (eg, 95% confidence interval). Make clear which confounders were adjusted for and why they were included | 10-12, 24-26 |
|                          |    | (b) Report category boundaries when continuous variables were categorized                                                                                                                                    | 10-12, 24-26 |
|                          |    | (c) If relevant, consider translating estimates of relative risk into absolute risk for a meaningful time period                                                                                             |              |
| Other analyses           | 17 | Report other analyses done—eg analyses of subgroups and interactions, and sensitivity analyses                                                                                                               |              |
| <b>Discussion</b>        |    |                                                                                                                                                                                                              |              |
| Key results              | 18 | Summarise key results with reference to study objectives                                                                                                                                                     | 12-13        |
| Limitations              | 19 | Discuss limitations of the study, taking into account sources of potential bias or imprecision. Discuss both direction and magnitude of any potential bias                                                   | 13-14        |
| Interpretation           | 20 | Give a cautious overall interpretation of results considering objectives, limitations, multiplicity of analyses, results from similar studies, and other relevant evidence                                   | 14-16        |
| Generalisability         | 21 | Discuss the generalisability (external validity) of the study results                                                                                                                                        | 13-14        |
| <b>Other information</b> |    |                                                                                                                                                                                                              |              |
| Funding                  | 22 | Give the source of funding and the role of the funders for the present study and, if applicable, for the original study on which the present article is based                                                | 16           |

\*Give information separately for exposed and unexposed groups.

**Note:** An Explanation and Elaboration article discusses each checklist item and gives methodological background and published examples of transparent reporting. The STROBE checklist is best used in conjunction with this article (freely available on the Web sites of PLoS Medicine at <http://www.plosmedicine.org/>, Annals of Internal Medicine at <http://www.annals.org/>, and Epidemiology at <http://www.epidem.com/>). Information on the STROBE Initiative is available at [www.strobe-statement.org](http://www.strobe-statement.org).

# BMJ Open

## Discrimination as a predictor of mental health issues among LGBTQ+ people during the COVID-19 pandemic: cross-sectional analysis of the online Queerantime Study

|                                 |                                                                                                                                                          |
|---------------------------------|----------------------------------------------------------------------------------------------------------------------------------------------------------|
| Journal:                        | <i>BMJ Open</i>                                                                                                                                          |
| Manuscript ID                   | bmjopen-2021-049405.R1                                                                                                                                   |
| Article Type:                   | Original research                                                                                                                                        |
| Date Submitted by the Author:   | 07-Apr-2021                                                                                                                                              |
| Complete List of Authors:       | Kneale, Dylan; University College London, EPPI-Centre, UCL Social Research Institute<br>Becares, Laia; University of Sussex, Social Work and Social Care |
| <b>Primary Subject Heading</b>: | Public health                                                                                                                                            |
| Secondary Subject Heading:      | Mental health, Sociology                                                                                                                                 |
| Keywords:                       | COVID-19, MENTAL HEALTH, SOCIAL MEDICINE                                                                                                                 |
|                                 |                                                                                                                                                          |

SCHOLARONE™  
Manuscripts



I, the Submitting Author has the right to grant and does grant on behalf of all authors of the Work (as defined in the below author licence), an exclusive licence and/or a non-exclusive licence for contributions from authors who are: i) UK Crown employees; ii) where BMJ has agreed a CC-BY licence shall apply, and/or iii) in accordance with the terms applicable for US Federal Government officers or employees acting as part of their official duties; on a worldwide, perpetual, irrevocable, royalty-free basis to BMJ Publishing Group Ltd ("BMJ") its licensees and where the relevant Journal is co-owned by BMJ to the co-owners of the Journal, to publish the Work in this journal and any other BMJ products and to exploit all rights, as set out in our [licence](#).

The Submitting Author accepts and understands that any supply made under these terms is made by BMJ to the Submitting Author unless you are acting as an employee on behalf of your employer or a postgraduate student of an affiliated institution which is paying any applicable article publishing charge ("APC") for Open Access articles. Where the Submitting Author wishes to make the Work available on an Open Access basis (and intends to pay the relevant APC), the terms of reuse of such Open Access shall be governed by a Creative Commons licence – details of these licences and which [Creative Commons](#) licence will apply to this Work are set out in our licence referred to above.

Other than as permitted in any relevant BMJ Author's Self Archiving Policies, I confirm this Work has not been accepted for publication elsewhere, is not being considered for publication elsewhere and does not duplicate material already published. I confirm all authors consent to publication of this Work and authorise the granting of this licence.

# Discrimination as a predictor of mental health issues among LGBTQ+ people during the COVID-19 pandemic: cross-sectional analysis of the online Queerantime Study

Dylan Kneale<sup>1</sup> and Laia Bécaries<sup>2,\*</sup>

<sup>1</sup> EPPI-Centre, UCL Social Research Institute, University College London

<sup>2</sup> School of Education and Social Work, University of Sussex

\*Joint first authors. Address correspondence to DK or LB

## Corresponding Author:

**Dylan Kneale**

EPPI-Centre, UCL Social Research Institute, University College London, London, UK

Email: [D.Kneale@ucl.ac.uk](mailto:D.Kneale@ucl.ac.uk)

**Laia Bécaries**

University of Sussex, Social Work and Social Care, 229A Essex House, Falmer, Sussex, UK  
BN1 9RH

Email: [L.Becaries@sussex.ac.uk](mailto:L.Becaries@sussex.ac.uk)



## Abstract

**Objectives:** To assess the mental health and experiences of discrimination amongst Lesbian, Gay, Bisexual, Transgender, Queer people (LGBTQ) at the start of the COVID-19 pandemic.

**Design:** Data come from a cross-sectional online survey targeted at LGBTQ+ people, which collected data on mental health, experiences of discrimination, and a number of other pandemic-related experiences. To examine the association between sexual orientation and gender, and mental health and experiences of discrimination, we conducted regression analyses that adjusted for a range of sociodemographic variables.

**Setting:** A web-based survey was used to collect data between the end of April and mid-July 2020.

**Participants:** An analytical sample of 310 LGBTQ+ respondents aged 18 and over.

**Main outcome measures:** We assessed mental health with the 4-item Perceived Stress Scale (PSS-4), and with the 10-item Center for Epidemiological Studies Depression scale (CES-D-10). We asked respondents about discriminatory experiences because of their LGBTQ+ identity during the coronavirus pandemic.

**Results:** Perceived stress scores among our LGBTQ+ sample were high (Mean: 7.67; Standard Deviation: 3.22). Based on a score of ten or over on the CES-D-10, the majority of participants had high levels of depressive symptoms (72%). Around one-in-six respondents reported some form of discrimination since the start of the pandemic because they were LGBTQ+ (16.7%). The average score for perceived stress increased by 1.44 points (95% Confidence Interval (CI): 0.517-2.354) for respondents who had experienced discrimination versus those who had not. Similarly, the odds of exhibiting significant depressive symptomology increased three-fold among those who had experienced discrimination compared to those who had not (OR: 3.251; 95% CI: 1.168-9.052).

**Conclusions:** The LGBTQ+ community exhibited increased levels of depression, stress, and experienced discrimination during the coronavirus pandemic. Increased levels of poor mental health were partially explained by experiences of discrimination which had a large, consistent and pernicious impact on mental health.

**Keywords:** COVID-19; LGBTQ+; mental health; stress; discrimination.

### Article summary – strengths and limitations of this study

- This study uses tools that have been validated among diverse populations to identify high levels of perceived stress and depressive symptoms among LGBTQ+ people.
- An online convenience sample was deemed appropriate for a number of reasons including the inherent risk of transmission of COVID-19 with methods involving physical contact and to better include respondents who were sheltering or shielding in households where their LGBTQ+ status was concealed .
- An online convenience sample can introduce issues around representativeness and the possibility that those with greater mental health issues self-selected into the survey.
- Due to relatively small sample sizes, we have not been able to fully examine the diversity of the LGBTQ+ community.
- Designing a survey that captured LGBTQ+ specific experiences allowed us to identify that sexuality- and gender-based discrimination experienced during the pandemic is an important predictor of mental health issues.

## 1 Introduction

2 The coronavirus pandemic has exposed and magnified existent societal and health inequities  
3 operating across multiple and intersecting systems of oppression.<sup>1 2</sup> Given documented stark  
4 health and socioeconomic inequalities across social locations related to sexuality, and gender  
5 expression and identity,<sup>3</sup> the coronavirus disease (COVID-19) and subsequent social and  
6 economic implications could be expected to have disproportionate impacts on Lesbian, Gay,  
7 Bisexual, Transgender, and Queer people (LGBTQ+, the “plus” including those who identify  
8 as non-heterosexual and/or non-cisgender in another way).

9  
10 Higher levels of pre-existing health conditions compared to cisgender and heterosexual  
11 populations, may place the LGBTQ+ community at additional risk of adverse prognosis. This  
12 includes long-term chronic illness, and higher rates of smoking and asthma among LGBTQ+  
13 people;<sup>4-7</sup> higher rates of obesity, and alcohol consumption among lesbian, bisexual, and  
14 queer women;<sup>7-9</sup> and increased likelihood of being immunocompromised (e.g. HIV+ with a  
15 low CD4 cell count or with untreated HIV) among gay men and transgender people.<sup>10</sup> In  
16 addition, the impacts of social distancing and lockdown may be felt acutely by LGBTQ+  
17 people, who were at greater risk of poorer mental health prior to the pandemic including  
18 higher risks of suicide attempts and suicidal ideation, higher levels of common mental  
19 disorders, and lower levels of mental wellbeing.<sup>11 12 13</sup> For example, studies using the 4-item  
20 Perceived Stress Score (PSS-4), a measure used in the present study (see methods), have  
21 found mean values have ranged between 6.75 and 7.43 for US college students who identified  
22 as ‘homosexual’ and bisexual respectively, compared to 6.09 among heterosexual students.<sup>14</sup>  
23 Similarly, studies examining depression using the Center for Epidemiological Studies  
24 Depression Scale (CES-D-10), a measure of depressive symptomatology used in the present  
25 study (see methods), have found that the proportion reporting substantial depressive

1 symptomology among African American LGB young people to stand at roughly double that  
2 of heterosexual young people in the southern United States (56.1% vs 28.4%).<sup>15</sup>

3 Comparative data on LGBTQ+ experiences during the pandemic are rare, although in the UK  
4 general population the average stress score (using the PSS-4 scale) was estimated to be 6.48  
5 (Standard Deviation: 3.3),<sup>16</sup> above a 6-point threshold used to indicate 'high' levels of stress  
6 elsewhere.<sup>17</sup> Estimates within the general (US) population during the COVID-19 pandemic  
7 have suggested that up to a third of people may be experiencing substantial depressive  
8 symptomology (using the CES-D-10 scale).<sup>18</sup>

9  
10 Within the heterogeneous LGBTQ+ umbrella term, individual groups may be positioned at a  
11 distinct disadvantage. Transgender and gender-diverse (TGGD) individuals have a gender  
12 that differs from the culturally-bound gender associated with one's assigned birth.<sup>19</sup> TGGD  
13 people are known to experience higher rates of adverse mental health compared to cisgender  
14 individuals (people whose gender matches their sex assigned at birth), particularly anxiety,  
15 depression, and suicidality.<sup>5 6 20</sup>

16  
17 Despite the accumulation of evidence indicating poorer health among LGBTQ+ people  
18 predating the pandemic, there is a dearth of information on whether the hypothesised  
19 additional risks outlined above have actually materialised in poorer outcomes among  
20 LGBTQ+ people during the COVID-19 pandemic. Indicative evidence suggests that some  
21 LGBTQ+ groups may exhibit higher levels of psychological trauma during the COVID-19  
22 pandemic<sup>21</sup> and other studies suggest that mental health among LGBTQ+ people may have  
23 deteriorated during the pandemic compared to pre-pandemic levels.<sup>22</sup> Certainly, LGBTQ+  
24 people face stressors during the pandemic that are not shared with heterosexual and cisgender  
25 people, including spending periods of 'lockdown' in households that are not affirming or

1 supportive of their sexual orientation or gender identity or expression, <sup>23</sup> being separated from  
2 social networks that are supportive and affirming to their identity, <sup>24 25</sup> and interruptions to  
3 accessing gender affirming care among transgender and gender non-binary people <sup>26 27</sup>.

4  
5 Theoretical frameworks including the Minority Stress Model suggest that stark health  
6 inequalities are the result of distal and proximal stressors caused by living within a  
7 homophobic, heterosexist, transphobic culture, results in cumulative experiences of  
8 discrimination, harassment, victimization, expectations of rejection, and internalized  
9 transphobia and homophobia. <sup>28 29</sup> These experiences have been extensively documented  
10 across several studies, where high prevalence of experiences of stigma and discrimination has  
11 been reported among the LGBTQ+ community. <sup>30 31</sup> During the pandemic, experiences of  
12 discrimination may have become magnified because, as described above, LGBTQ+ people  
13 may have been sheltering in households that were unsupportive or hostile towards their  
14 identities, <sup>23</sup> or have not received support from networks and relevant organisations. In some  
15 contexts, the pandemic has triggered a rise in hate speech and targeted attacks on the  
16 LGBTQ+ community, and members of the LGBTQ+ community have been blamed for the  
17 very emergence of the virus. <sup>32</sup> Unrelated to the coronavirus itself, the lockdown coincided  
18 with online debates around sex and gender, which have manifested in transphobic comments  
19 made and supported by high profile figures, and a hostile online environment for many  
20 transgender people. <sup>33</sup> These attacks occurred at a time when many in the community were  
21 unable to draw on their usual support networks.

22  
23 In the context of the coronavirus pandemic where existent inequalities are being exacerbated  
24 across social locations, <sup>2</sup> it is paramount to document how the LGBTQ+ community has fared  
25 during the initial stages of the coronavirus pandemic. The present study aims to address this

1 need through analysing data from the Queerantime Study (a portmanteau Queer and  
2 Quarantine), a web-based survey that assesses how LGBTQ+ adults are experiencing the  
3 coronavirus pandemic. In the present paper, we examine extent to which respondents to the  
4 Queerantime survey experienced forms of sexuality or gender-based discrimination, including  
5 harassment and exclusion, during the coronavirus pandemic. We also examine how  
6 widespread experiences of perceived stress and depressive symptomology were among  
7 respondents to the Queerantime survey and examine to what extent instances of harassment  
8 and exclusion predict poorer mental health among LGBTQ+ respondents during the  
9 coronavirus pandemic.

10

## 11 **Methods**

12 Data collection was conducted via a cross-sectional, web-based anonymous survey. It began  
13 on 27<sup>th</sup> April 2020 and ended on 30<sup>th</sup> December 2020.. Twitter, Facebook and Instagram  
14 accounts were created for the study and were used to disseminate links to the survey in order  
15 to maximise the response rate. We contributed guest blogs and created a website in order to  
16 help publicise the study (<https://queerantinestudy.wixsite.com/queerantime>). The link to the  
17 survey was distributed through a number of LGBTQ+ organisations including through the  
18 newsletter of the LGBT Consortium, the largest network of LGBT+ groups, projects and  
19 organisations in the UK, as well as directly by local organisations such as the East London  
20 Out Project (ELOP). The target sample included respondents aged 18 and over, and who self-  
21 identify as lesbian, gay, bisexual, queer, as having another minority sexual orientation; or  
22 who were transgender or gender diverse in other ways including being non-binary or intersex.  
23 Cisgender respondents who self-identify as heterosexual were not excluded from the survey,  
24 although recruitment and survey design were tailored towards the LGBTQ+ community, and  
25 their responses were not included in the analyses presented here. The Queerantime survey

1 asked respondents about their sociodemographic characteristics, their physical and mental  
2 health, health behaviours, and experiences and anxieties relating to the pandemic and their  
3 identity. Ethical approval was obtained from the ethics board of the University of Sussex  
4 (ER/LB516/4) and University College London (REC 1335).

## 6 **Patient and Public Involvement**

7 Expert input from a representative of a national LGBT umbrella organisation broadened the  
8 focus of the survey to consider how respondents had experienced changes in support from  
9 LGBTQ+ service providers and organisations; this input also helped to shape the measures  
10 around gender. Community organisations also helped in the dissemination of the study  
11 through social media and inclusion of the study within newsletters. However, no further  
12 public involvement was sought in the design or analysis of the survey.

## 14 **Outcome variables**

15 In this analysis we focus on three outcomes: depressive symptoms, perceived stress, and  
16 experiences of discrimination. We assessed depression with the 10-item Center for  
17 Epidemiological Studies Depression Scale (CES-D-10), which asks respondents to consider  
18 how much in the past week they have experienced feelings of loneliness, happiness, and fear.  
19 <sup>34</sup> The CES-D-10 includes three items on depressed affect, five items on somatic symptoms,  
20 and two on positive affect. <sup>35</sup> Scores range between 0 and 30 with good levels of internal  
21 consistency in our analytical sample (Cronbach's  $\alpha=0.87$ ). Thresholds were used to denote  
22 significant depressive symptoms' based on a score of ten or over <sup>34</sup>. In the present study we  
23 mainly examine the CES-D-10 as a binary measure, with supplementary analyses presenting  
24 data on CES-D-10 in continuous models.

1 We measured stress with the 4-item Perceived Stress Scale (PSS-4), which assesses the extent  
2 to which situations in life are viewed as stressful.<sup>36</sup> The scale asks respondents about  
3 respondents' perceived ability to control important things in life, confidence in handling  
4 personal problems, the extent to which they felt things were going their way, and whether  
5 difficulties were piling up so high they were becoming insurmountable, using the past month  
6 as a frame of reference. Scores range between 0 and 15, and have good levels of internal  
7 consistency in our analytical sample (Cronbach's  $\alpha=0.83$ ).

8  
9 We measured experiences of discrimination with a set of options that asked respondents  
10 whether, since the start of the coronavirus pandemic, they had experienced verbal  
11 harassment, physical harassment, sexual harassment, threats of violence, exclusion from  
12 events/activities, involuntary disclosure of LGBTQ+ identity, or other forms of inappropriate  
13 treatment because they were LGBTQ+ or were perceived as being LGBTQ+. Individual  
14 measures were combined into one summary variable of 'any discrimination.'

## 16 **Sexual orientation and gender**

17 Gender was assessed using the recommended two-step method<sup>37</sup> with two items: (1) the  
18 gender that participants felt best represented them (options included: Female (including trans  
19 woman); Male (including trans man); Non-binary; Other (free text category)), and (2)  
20 whether this gender was the same as assigned at birth (options included: Yes; No; Don't  
21 Know). The two items were cross-tabulated to categorise participants as either transgender  
22 and gender diverse (TGGD) or cisgender. Sexual orientation was captured with a question  
23 that asked participants to select their sexual orientation from the following categories:  
24 Bisexual; Gay/Lesbian; Heterosexual/Straight; Don't know; Prefer not to say; and an Other,  
25 free-text category. Using pre-defined response categories, respondents could only select one



1 category, although those who identified with multiple categories (e.g. Queer and Bisexual or  
2 Male and Non-binary) could use the free-text option to state this, with respondents declaring  
3 more than one gender being categorised as transgender and gender diverse, and respondents  
4 selecting more than one sexual orientation categorised as having another non-heterosexual  
5 orientation.

6  
7 We present data on sexual orientation and gender as different constructs in supplementary  
8 analyses, although the main analyses use a variable that examines the intersection of sexual  
9 orientation and gender using five categories: (i) cisgender female lesbian/gay; (2) cisgender  
10 female with another non-heterosexual orientation (including bisexual, other, don't know, and  
11 prefer not to say); (3) transgender and gender diverse; (4) cisgender male gay; (5) cisgender  
12 male with another non-heterosexual orientation (including bisexual, other, don't know, and  
13 prefer not to say).

### 14 15 **Covariates**

16 We adjusted for variables thought to confound the association between our exposure and  
17 outcome variables. Socioeconomic status was measured through a variable that asked  
18 respondents about their subjective social status (modelled on an approach used in general  
19 population surveys<sup>38</sup>), and how this had changed since the start of the pandemic, with  
20 categories reflecting no change, positive change, and negative change.

### 21 22 **Analytical plan**

23 Data for the present analyses includes responses collected until 13 July 2020. The analysis  
24 mainly consisted of a complete case analysis of respondents, although a dummy category of  
25 no information (missing) for the harassment variable was created for models of mental health

1 in order to preserve sample size. Summary statistics were calculated for baseline  
2 characteristics and associations between exposure variables and outcomes were tested in  
3 unadjusted analyses using the  $\chi^2$  test of association and ANOVA as appropriate. The  
4 modelling began with exploring selected predictors of discrimination before examining how  
5 discrimination itself predicted poorer mental health. Binary logistic regression models were  
6 constructed for harassment and high depressive symptomology; Ordinary Least Squares  
7 (OLS) regression models were constructed for continuous models of perceived stress and  
8 depressive symptoms. Results for both binary and continuous specifications of CES-D-10 are  
9 discussed, with the results for the continuous specification included in supplementary  
10 analyses, as a form of sensitivity analysis. For models where discrimination is the outcome of  
11 interest we only adjusted for sexual orientation and gender, age, ethnicity, and location. For  
12 models where depressive symptomology or perceived stress are the outcomes of interest, we  
13 used the measure of discrimination as the main exposure variable, and adjusted for the same  
14 covariates as above as well socioeconomic status and relationship status. A different set of  
15 controls was used between models as the potential confounders were theorised to differ  
16 slightly and due to the lower number of 'events' in the model of discrimination.  
17 Additional analysis examining when in the pandemic harassment and discrimination occurred  
18 is also included to contextualise the discussion. Adjusted and unadjusted models are  
19 presented, and in line with suggested practice, estimates were evaluated based the exact p-  
20 value, the magnitude of the coefficients and the width of the confidence intervals, rather than  
21 on a single test statistic.<sup>39</sup> We conducted all analyses in Stata 14.<sup>40</sup> The decision on how to  
22 present the findings across diverse identities is challenging, particularly as we combined  
23 information on sexual orientation and gender in deriving categories. Our decisions reflected  
24 considerations of the conceptual similarities/differences between groups, the numbers across  
25 groups within our sample, as well as the decision to adopt an 'inclusive' or 'specific'

1 approach<sup>41</sup> when analysing the data based on observed differences in key variables. Some  
2 preliminary analysis (not shown) was undertaken to explore the validity of bringing different  
3 groupings together before the decision was taken to use five main categories combining  
4 sexual orientation and gender.

## 6 **Results**

7 Between April 27<sup>th</sup> and July 13<sup>th</sup> we received a total of 426 responses. Of these 24 were  
8 excluded because they did not provide their age, and 4 were excluded because they were aged  
9 under 18. Of the remaining 398, we were able to calculate PSS-4 and CES-D-10 scores for  
10 325 and 324 respondents respectively. Once we had accounted for missingness on other  
11 covariates, the analytical sample consisted of 310 respondents for models of mental health,  
12 excluding one further cisgender heterosexual respondent.

14 *TABLE 1 HERE*

16 Participants identified their sexual orientation and gender in a number of different ways. The  
17 largest group identified as cisgender gay males (30.0%); almost a quarter of the sample  
18 (23.5%) were categorised as TGGD (of different sexual orientations); cisgender gay and  
19 lesbian females comprised 22.9% of the respondents; while cisgender females with another  
20 non-heterosexual orientation accounted for 19.4% of respondents, and cisgender males with  
21 another non-heterosexual orientation accounted for 4.2% of respondents. A further  
22 breakdown of respondents' identities is available in the supplementary materials, with  
23 descriptive information on key variables. Respondents aged 18-24 accounted for less than a  
24 fifth of the sample (15.1%), while those aged 55+ accounted for less than a tenth of the  
25 sample (7.1%), with a greater representation of respondents aged 25-54 years old.

1 Descriptively, the mean scores for PSS-4 suggested that the sample had high levels of  
2 perceived stress (Mean (M): 7.67; Standard Deviation (SD): 3.22). Using the recommended  
3 threshold of 10 or more to identify significant depressive symptomatology, we observed that  
4 the majority of respondents fell into this category (71.9%). Cis-female respondents who  
5 identify as gay or lesbian had the lowest scores for perceived stress or depressive symptoms  
6 (see Table 1); conversely transgender and gender diverse individuals had the highest scores  
7 (83.6%).

8  
9 One-in-six respondents reported some form of harassment since the start of the pandemic  
10 because they were LGBTQ+ (16.7%); the most common forms being verbal harassment  
11 including insults or other hurtful comments (8.7%), exclusion from events or activities  
12 (5.6%), and involuntary disclosure of LGBTQ+ identity (3.5%). Perceived stress was  
13 markedly higher for those who had experienced discrimination (PSS-4 M: 9.44 SD: 2.99)  
14 compared to those who had not (PSS-4 M: 7.35 SD: 3.16). Respondents who had experienced  
15 discrimination also had higher depressive symptomatology scores (CES-D-10 M: 17.87 SD:  
16 6.21) compared to those who had not (CES-D-10 M: 13.43 SD: 6.97).

17  
18 *TABLE 2 HERE*

19  
20 We examined the relationship between gender and sexual orientation and discrimination in  
21 logistic regression models (see Table 2). Based on the association observed in Table 1, we  
22 used TGGD as the reference category and explored whether the higher risk of TGGD people  
23 to experience discrimination remained after controlling for basic sociodemographic  
24 covariates. The results from adjusted models showed that the odds of experiencing  
25 discrimination were lower for all other groups, and significantly lower in the case of

1  
2  
3 1 cisgender gay males (OR: 0.237, 95% Confidence Interval (CI):0.091-0.617) and cisgender  
4  
5 2 females who identified with a sexual minority orientation other than gay/lesbian (OR: 0.361,  
6  
7 3 CI: 0.141-0.921). Within the sample, the results were suggestive of a u-shaped trend in terms  
8  
9 4 of age, with the youngest and the oldest LGBTQ+ respondents in the sample being at greatest  
10  
11 5 risk of experiencing discrimination, although differences by age were generally not  
12  
13 6 statistically significant.  
14  
15  
16  
17 7

18  
19 8 Experiences of discrimination were clear predictors of poorer mental health. The average  
20  
21 9 score for perceived stress increased by 1.44 points (CI: 0.517-2.354) for those who had  
22  
23 10 experienced discrimination, compared to those who had not. Similarly, the odds of exhibiting  
24  
25 11 significant depressive symptomology (CES-D-10 scores of 10 or more) increased three-fold  
26  
27 12 among those who had experienced discrimination based on their gender or sexuality  
28  
29 13 compared to those who had not (OR: 3.251; 95% CI: 1.168-9.052). These marked  
30  
31 14 associations remained after adjusting for potential confounders (see Models 1 to 4 in Table  
32  
33 15 3).  
34  
35  
36  
37  
38  
39

40 17 *TABLE 3 HERE*  
41  
42  
43  
44

45 19 Cisgender female lesbian or gay respondents had lower perceived stress levels than other  
46  
47 20 LGBTQ+ groups. TGGD respondents and non-heterosexual cisgender males who didn't  
48  
49 21 identify as gay had among the highest average perceived stress scores in adjusted models.  
50  
51 22 Although similar trends were observed in the odds of experiencing depressive  
52  
53 23 symptomatology, the evidence was ultimately inconclusive for these groups, although  
54  
55 24 cisgender females with another non-heterosexual orientation besides lesbian or gay had a  
56  
57 25 higher risk of significant depressive symptoms relative lesbian/gay cisgender women. Further  
58  
59  
60

1 sensitivity analysis of the CES-D-10 as a continuous measure (see supplementary files)  
2 shows that TGGD people had substantially higher CES-D-10 scores than cisgender lesbian or  
3 gay females, with an average score 3.38 points (95% CI: 1.172-5.595) higher after adjusting  
4 for other covariates. A clear trend by age was observed in models 3 and 4 (see Table 3), with  
5 younger respondents having significantly poorer mental health than older individuals, both  
6 for perceived stress and significant depressive symptomology, after adjusting for other  
7 covariates.

8

## 9 **Discussion**

10 In this study we present data on the levels of depressive symptoms, perceived stress, and  
11 experiences of discrimination of LGBTQ+ people during the COVID-19 pandemic collected  
12 through a web-based survey. Respondent characteristics broadly mirrored the  
13 sociodemographic characteristics of the recent UK government National LGBT Survey.<sup>42</sup>  
14 The distribution of respondents by sexual orientation was very similar, albeit with a higher  
15 share of respondents who identified as Queer in the Queerantime survey (8% vs  
16 approximately 1%). The proportion of respondents aged 18-24 was lower at 15.1%  
17 (compared with approximately 37.4%), with higher proportions at older age groups in line  
18 with the UK population as a whole. The Queerantime survey had a larger proportion of  
19 participants who were TGGD than the UK National LGBT Survey (23.5% vs 15%).<sup>42</sup>

20

21 We find that scores for perceived stress and depressive symptoms among our LGBTQ+  
22 sample are high, and higher than observed in community samples and vulnerable populations  
23 in the recent past (for example<sup>43 44</sup>). Furthermore, we find that the pandemic may not be  
24 impacting the LGBTQ+ community evenly, with TGGD individuals having particularly high  
25 scores for perceived stress and depressive symptoms relative to cisgender gay and lesbian  
26

1 individuals. Non-heterosexual respondents who are cisgender but do not identify as lesbian or  
2  
3 gay also had elevated scores for perceived stress and depressive symptoms. Similarly, there  
4  
5 was a clear age gradient with younger LGBTQ+ people having much higher risks of showing  
6  
7 symptoms of stress and depression. An important caveat to these results is that because of our  
8  
9 cross-sectional design, we are unable to definitively state that mental health status  
10  
11 *deteriorated* as a result of the pandemic and whether any deterioration in mental health was  
12  
13 concentrated among TGGD respondents or younger respondents; our study design also means  
14  
15 we are unable to make direct comparisons to ascertain whether LGBTQ+ people are faring  
16  
17 worse during the pandemic than heterosexual cisgender people. However, the underlying  
18  
19 pathways through which LGBTQ+ people may have experienced greater and specific  
20  
21 challenges during the pandemic and lockdown are becoming evident,<sup>22-27</sup> providing a basis  
22  
23 for an assumption that LGBTQ+ people may have experienced greater stressors, with TGGD  
24  
25 people facing particular sets of stressors, albeit on a theoretical basis and in need of further  
26  
27 exploration and verification. Furthermore the very high levels of mental health issues  
28  
29 uncovered here make it challenging to simply attribute such stark levels of mental health  
30  
31 issues as the status quo pre-pandemic, although this assumption again needs further  
32  
33 exploration and verification using a different study design. Regardless, the data definitively  
34  
35 show that the pandemic has had a pernicious effect on the mental health of the LGBTQ+  
36  
37 community.  
38  
39  
40  
41  
42  
43  
44  
45  
46  
47  
48

49 Our analyses of discrimination reinforce the rationale for undertaking analyses of LGBTQ+  
50  
51 health and mental health, with LGBTQ+ people theorised at greater risk of health  
52  
53 complications due to a unique set of internal and external homophobic, heteronormative, and  
54  
55 transphobic stressors.<sup>45</sup> We found that almost one-in-six respondents reported experiencing  
56  
57 some form of discrimination during the pandemic, with TGGD respondents again at  
58  
59  
60

1 heightened risk of experiencing discrimination relative to other LGBTQ+ groups. Our results  
2 show that experiencing discrimination was a risk factor for higher perceived stress and  
3 depressive symptomology; the odds of reporting depressive symptomatology among  
4 individuals who had experienced discrimination were three times higher than among  
5 individuals who had not experienced any discrimination. Open ended responses to the survey  
6 described various experiences of discrimination and inappropriate incidents including  
7 increased or excessive scrutiny, misgendering, exclusion, and online abuse.

8  
9 To further understand the results, we explored how mental health and discrimination varied  
10 over the course of the survey. We observed that mental health scores in the sample were  
11 poorer during the period April 27<sup>th</sup>-May 10<sup>th</sup> (the moment of ‘maximum risk’ as defined by  
12 the UK Prime Minister) and during the period between May 23<sup>rd</sup>-June 14<sup>th</sup> (coinciding with  
13 revelations of lockdown breaches by government officials in the UK, transphobic comments  
14 on social media made by high profile figures, and protests surrounding the murder of George  
15 Floyd), although these differences were not significant. Similarly, we observed non-  
16 statistically significant differences in the proportion of respondents reporting instances of  
17 discrimination, with the initial easing of the lockdown and particularly the period from June  
18 15<sup>th</sup> onwards coinciding with increases in discrimination (see Figure 1), albeit based on a  
19 small sample in the latter period. These trends help contextualise the results and illuminate  
20 the hostile environments which LGBTQ+ people, and particularly TGGD respondents, were  
21 experiencing.

22  
23 *FIGURE 1 HERE*

## 24 25 **Limitations**



1  
2  
3 1 Due to relatively small sample sizes, we have not been able to fully examine the diversity of  
4  
5 2 the LGBTQ+ community, and fully examine how experiences vary according to social  
6  
7 3 locations such as ethnicity, age, and gender. Studies in the US show that the highest levels of  
8  
9 4 violence are reported among transgender women of colour, and among young and low-  
10  
11 5 income transgender people,<sup>30 31</sup> suggesting that violence on the basis of transgender identity  
12  
13 6 or expression often affects the most marginalised subpopulations. Although we have adjusted  
14  
15 7 for these factors in our models, we have not been able to further disaggregate across social  
16  
17 8 locations to examine the role of interlocking systems of oppression in patterning experiences  
18  
19 9 of discrimination and adverse mental health.  
20  
21  
22  
23  
24  
25

26 11 While our data collection efforts are limited by the inherent challenge of surveying a small,  
27  
28 12 dispersed, diverse, and difficult to reach population, it is nonetheless critically important to  
29  
30 13 study the lives and experiences of discrimination and mental health among LGBTQ+  
31  
32 14 communities because of the stark health and social inequalities they experienced before the  
33  
34 15 pandemic. Our choice of mental health measures reflected the need to field short scales  
35  
36 16 within a web-based survey where there was no incentive provided for respondents to  
37  
38 17 complete the questions. However, other more comprehensive or alternative measures of  
39  
40 18 mental health, and particularly mental wellbeing, may have yielded further nuance to the  
41  
42 19 results presented here.  
43  
44  
45  
46  
47  
48

49 21 New purposeful data collection was deemed appropriate as although a number of large  
50  
51 22 representative studies (e.g. the UK Household Longitudinal Study) are currently collecting  
52  
53 23 data on COVID-19 experiences, they typically contain small numbers of LGBTQ+ people,<sup>8</sup>  
54  
55 24 <sup>12</sup> often do not collect information on TGGD identities, and contain heteronormative  
56  
57 25 measures that can be exclusionary to LGBTQ+ respondents. An online convenience sample  
58  
59  
60

1 was deemed appropriate due to the absence of robust data on LGBTQ+ people from large  
2 surveys that could help to determine the characteristics of a representative sample of  
3 LGBTQ+ people, as well as the risks inherent with any form of physical data collection  
4 during the pandemic. An online approach was particularly suitable for those respondents who  
5 may have been sheltering or shielding in households where their LGBTQ+ status was  
6 unknown to other members of the household. Furthermore, this approach is in line with other  
7 recent large scale efforts at understanding the health of LGBT people in the UK.<sup>42</sup> We do,  
8 nevertheless, acknowledge that an online convenience sample can introduce potential issues  
9 around sample selection, such as the omission of those without internet access, and the  
10 possibility that those living in stressful situations or with depressive symptoms were more  
11 likely to self-select into the survey. Although rudimentary checks for data patterns that could  
12 indicate that ‘bots’ completed the survey were implemented, focussed on identifying cases  
13 where the same response had been provided to all Likert scale type questions, or where the  
14 middle response had been consistently provided, there remains a possibility that some  
15 responses may be based on false or duplicate records. Further measures that could have been  
16 implemented, such as password protection or identity checking, were not congruent with a  
17 format that allowed respondents to complete the survey anonymously, or believe that they  
18 were doing so.

19  
20 As the inferential analysis consisted of three regression models where we show the  
21 development of the model by including additional regressors, we did not implement  
22 additional correction for multiple hypotheses (e.g. Bonferroni). We do note that, given a  
23 scenario where 20 hypotheses were being tested at a 5% level, we would expect to see at least  
24 one such deviation where we would interpret a result as being ‘statistically significant’

1 inappropriately <sup>46</sup>; however, as discussed earlier, we also took a broader approach to  
2 evaluating estimates than interpreting p-values as being “significant” or “nonsignificant”. <sup>39</sup>

3

#### 4 **Public Health Implications**

5 Results from the Queerantime Study suggest that groups within LGBTQ+ acronym may be at  
6 differential risk of experiencing stress or depressive symptomology, although the sample as a  
7 whole may also be at higher risk than the general population of stress and depressive  
8 symptomology due to minority stress. Homophobic and transphobic harassment and  
9 exclusion experienced during the pandemic has a deleterious impact on LGBTQ+ mental  
10 health, demonstrated by the strong and consistent associations between harassment and  
11 poorer mental health in the models. Open-ended responses to survey questions emphasise the  
12 importance of LGBTQ+ social networks, often facilitated by the work of LGBTQ+  
13 organisations, in supporting LGBTQ+ individuals. However, these are the very organisations  
14 that are facing financial challenges with many on the brink of closure. <sup>47</sup>

15  
16 Globally, LGBT+ rights organisations have alerted policy-makers about the need to address  
17 the vulnerability of the LGBTQ+ community to the coronavirus pandemic, including  
18 collecting sexual orientation and gender data for COVID-19 cases, increased socioeconomic  
19 support for disadvantaged individuals, and support for organisations working with the  
20 community. <sup>48</sup> Our findings provide support to these demands given the documented high  
21 prevalence of depressive symptomology and stress, and the concerning reports of experiences  
22 of discrimination. Poor LGBTQ+ mental health may remain unchecked without substantial  
23 commitment and funding directed to ameliorating health inequalities exacerbated by the  
24 pandemic.

25

## 1 **Contributors**

2 DK and LB are equal contributors to this study. Both designed the Queerantime survey,  
3 developed the research focus, analysed the data, and drafted and edited the manuscript. DK  
4 and LB are the guarantors for this study and gave full approval of this version to be  
5 published.

## 7 **Data sharing statement**

8 No additional data are available.

## 10 **Competing interests**

11 None to declare. Due to the nature of this research, participants of this study did not agree for  
12 their data to be shared publicly, so supporting individual level data is not available.

## 14 **Funding**

15 This research received no specific grant from any funding agency in the public, commercial  
16 or not-for-profit sectors.

## 18 **Ethical approval**

19 Ethical approval was obtained from the ethics board of the University of Sussex  
20 (ER/LB516/4) and University College London (REC 1335).

## 22 **Acknowledgments**

23 We would like to thank the participants of the #Queerantime Study for sharing their  
24 experiences with us. We would also like to thank Harri Weeks and the National LGB&T  
25 Partnership for their advice and to all those who have helped to promote the study through

1 social media and in other ways. We would also like to thank Joanna Boyce for contributing  
 2 social media expertise that helped to boost the response rate. We would like to thank the peer  
 3 reviewers of this article for their comments and suggestions on an earlier draft.

20 Figure 1 Proportion of respondents reporting discrimination by period in the pandemic

## 23 References

- 25 1. Bowleg L. We're not all in this together: on COVID-19, intersectionality, and structural inequality.  
 26 *American Journal of Public Health* 2020;110(no. 7 (July 1, 2020)):917-17.
- 27 2. Marmot M, Allen J. COVID-19: exposing and amplifying inequalities. *J Epidemiol Community Health*  
 28 2020;74(9):681-82.
- 29 3. Zeeman L, Sherriff N, Browne K, et al. A review of lesbian, gay, bisexual, trans and intersex (LGBTI)  
 30 health and healthcare inequalities. *European journal of public health* 2019;29(5):974–80.
- 31 4. Conron K, Mimiaga M, Landers S. A population-based study of sexual orientation identity and  
 32 gender differences in adult health. *American Journal of Public Health* 2010;100(10):1953-60.
- 33 5. Hudson-Sharp N, Metcalf H. Inequality among lesbian, gay bisexual and transgender groups in the  
 34 UK: a review of evidence. London: National Institute of Economic and Social Research, 2016.
- 35 6. Reisner SL, Poteat T, J. K, et al. Global health burden and needs of transgender populations: a  
 36 review. *The Lancet* 2016;388(10042):412-36.
- 37 7. Shahab L, Brown J, Hagger-Johnson G, et al. Sexual orientation identity and tobacco and  
 38 hazardous alcohol use: findings from a cross-sectional English population survey. *BMJ Open*  
 39 2017;7:e015058.

- 1 8. Bécares L. Health and socio-economic inequalities by sexual orientation among older women in  
2 the United Kingdom: Findings from the UK Household Longitudinal Study. *Ageing and Society*  
3 2020;1-19. doi: doi:10.1017/S0144686X20000367
- 4 9. Semlyen J, Curtis T, Varney J. Sexual orientation identity in relation to unhealthy Body Mass Index  
5 (BMI): Individual Participant Meta-Analysis of 93,429 individuals from 12 UK health surveys.  
6 *Journal of Public Health* 2019;fdy224
- 7 10. Herbst J, Jacobs E, Finlayson T, et al. Estimating HIV prevalence and risk behaviors of transgender  
8 persons in the United States: A systematic review. *AIDS and Behavior* 2008;12:1-17.
- 9 11. Fredriksen-Goldsen K, Kim H, Bryan A, et al. The cascading effects of marginalization and  
10 pathways of resilience in attaining good health among LGBT older adults. *The Gerontologist*  
11 2017;57(suppl\_1): S72-S83.
- 12 12. Kneale D, Thomas J, French R. Inequalities in health and care among Lesbian, Gay and Bisexual  
13 people aged 50 and over in the United Kingdom: A systematic review and meta-analysis of  
14 sources of individual participant data. *The Journals of Gerontology: Series B* 2020:gbaa071.  
15 doi: doi.org/10.1093/geronb/gbaa071
- 16 13. Russell ST, Fish JN. Mental health in lesbian, gay, bisexual, and transgender (LGBT) youth. *Annual*  
17 *review of clinical psychology* 2016;12:465-87.
- 18 14. Schauer GL, Berg CJ, Bryant LO. Sex differences in psychosocial correlates of concurrent  
19 substance use among heterosexual, homosexual and bisexual college students. *The*  
20 *American journal of drug and alcohol abuse* 2013;39(4):252-58.
- 21 15. Mereish EH, Sheskier M, Hawthorne DJ, et al. Sexual orientation disparities in mental health and  
22 substance use among Black American young people in the USA: effects of cyber and bias-  
23 based victimisation. *Culture, health & sexuality* 2019;21(9):985-98.
- 24 16. Jia R, Ayling K, Chalder T, et al. Mental health in the UK during the COVID-19 pandemic: early  
25 observations. *MedRxiv* 2020 doi: <https://doi.org/10.1101/2020.05.14.20102012>
- 26 17. Malik AO, Peri-Okonny P, Gosch K, et al. Association of perceived stress with health status  
27 outcomes in patients with peripheral artery disease. *Journal of psychosomatic research*  
28 2021;140:110313.
- 29 18. Rosenberg M, Luetke M, Hensel D, et al. Depression and loneliness during April 2020 COVID-19  
30 restrictions in the United States, and their associations with frequency of social and sexual  
31 connections. *Soc Psychiatry Psychiatr Epidemiol* 2021:1-12.
- 32 19. Davidson M. Seeking refuge under the umbrella: Inclusion, exclusion, and organizing within the  
33 category transgender. . *Sexuality Research & Social Policy* 2007;4(4):60-80.
- 34 20. Meyer IH, Brown TN, Herman JL, et al. Demographic Characteristics and Health Status of  
35 Transgender Adults in Select US Regions: Behavioral Risk Factor Surveillance System, 2014.  
36 *American Journal of Public Health* 2016;107(4):582-89.
- 37 21. Marmet S, Wicki M, Gmel G, et al. Sexual minority orientation is associated with greater  
38 psychological impact due to the COVID-19 crisis—evidence from a longitudinal cohort study  
39 of young Swiss men. *PsyArXiv January* 2021;15
- 40 22. Linnemayr S, Barreras JL, Izenberg M, et al. Longitudinal Assessment of Changes in Mental and  
41 Sexual Health Outcomes Due to COVID-19 Among Latinx SMM and TGW. *JAIDS Journal of*  
42 *Acquired Immune Deficiency Syndromes* 2020;85(5):e90-e92.
- 43 23. Gonzales G, de Mola EL, Gavulic KA, et al. Mental health needs among lesbian, gay, bisexual, and  
44 transgender college students during the COVID-19 pandemic. *Journal of Adolescent Health*  
45 2020;67(5):645-48.
- 46 24. Gato J, Barrientos J, Tasker F, et al. Psychosocial effects of the COVID-19 pandemic and mental  
47 health among LGBTQ+ young adults: a cross-cultural comparison across six nations. *Journal*  
48 *of Homosexuality* 2021;68(4):612-30.
- 49 25. Thomas B. Only Connect – The Impact of Covid-19 on Older LGBT+ People. London: Opening  
50 Doors London, 2020.

- 1  
2  
3 1 26. Jarrett B, Peitzmeier SM, Restar A, et al. Gender-affirming care, mental health, and economic  
4 2 stability in the time of COVID-19: a global cross-sectional study of transgender and non-  
5 3 binary people. *medRxiv* 2020 doi: <https://doi.org/10.1101/2020.11.02.20224709>  
6 4  
7 4 27. Koehler A, Motmans J, Alvarez LM, et al. How the COVID-19 pandemic affects transgender health  
8 5 care in upper-middle-income and high-income countries—A worldwide, cross-sectional  
9 6 survey. 2020  
10 7  
11 8 28. Hendricks M, Testa R. A conceptual framework for clinical work with transgender and gender  
12 9 nonconforming clients: An adaptation of the Minority Stress Model. *Professional Psychology:  
13 10 Research and Practice* 2012;43(5):460-67.  
14 11  
15 12 29. Meyer IH. Prejudice, social stress, and mental health in lesbian, gay, and bisexual populations:  
16 13 conceptual issues and research evidence. *Psychological bulletin* 2003;129(5):674-97.  
17 14  
18 14 30. Bradford J, Reisner SL, Honnold JA, et al. Experiences of transgender-related discrimination and  
19 15 implications for health: results from the Virginia Transgender Health Initiative Study.  
20 16 *American Journal of Public Health* 2013;103(10):1820-29.  
21 17  
22 18 31. White Hughto JM, Reisner SL, Pachankis JE. Transgender stigma and health: A critical review of  
23 19 stigma determinants, mechanisms, and interventions. *Social Science and Medicine*  
24 20 2015;147:222-31.  
25 21  
26 21 32. Gahan L, Almack K. Experiences of and responses to disempowerment, violence, and injustice  
27 22 within the relational lives of lesbian, gay, bisexual, transgender, and queer people. *Journal of  
28 23 Sociology* 2020  
29 24  
30 25 33. Tudor A. *Terfism is White Distraction: On BLM, Decolonising the Curriculum, Anti-Gender Attacks  
31 26 and Feminist Transphobia*. Engenderings. London: LSE, 2020.  
32 27  
33 28 34. Andresen EM, Malmgren JA, Carter WB, et al. Screening for depression in well older adults:  
34 29 Evaluation of a short form of the CES-D. *American journal of preventive medicine*  
35 30 1994;10(2):77-84.  
36 31  
37 31 35. Baron EC, Davies T, Lund C. Validation of the 10-item centre for epidemiological studies  
38 32 depression scale (CES-D-10) in Zulu, Xhosa and Afrikaans populations in South Africa. *BMC  
39 33 psychiatry* 2017;17(1):6.  
40 34  
41 35 36. Cohen S, Kamarck T, Mermelstein R. A global measure of perceived stress. *Journal of health and  
42 36 social behavior* 1983:385-96.  
43 37  
44 37 37. The GenIUSS Group. *Best Practices for Asking Questions to Identify Transgender and Other  
45 38 Gender Minority Respondents on Population-Based Surveys*. Los Angeles, CA: The Williams  
46 39 Institute, 2014.  
47 40  
48 41 38. Singh-Manoux A, Adler NE, Marmot MG. Subjective social status: its determinants and its  
49 42 association with measures of ill-health in the Whitehall II study. *Social science & medicine*  
50 43 2003;56(6):1321-33.  
51 44  
52 45 39. Greenland S, Senn SJ, Rothman KJ, et al. Statistical tests, P values, confidence intervals, and  
53 46 power: a guide to misinterpretations. *Eur J Epidemiol* 2016;31(4):337-50.  
54 47  
55 48 40. Stata Statistical Software: Release 14 [program]. College Station, TX: StataCorp LP, 2015.  
56 49  
57 49 41. Restar A, Jin H, Operario D. Gender-inclusive and gender-specific approaches in trans health  
58 50 research. *Transgender Health* 2020  
59 51  
60 51 42. Government Equalities Office. *National LGBT survey*. Manchester: Government Equalities Office  
2018.  
43. Warttig SL, Forshaw MJ, South J, et al. New, normative, English-sample data for the short form  
perceived stress scale (PSS-4). *Journal of health psychology* 2013;18(12):1617-28.  
44. Zhang W, O'Brien N, Forrest JI, et al. Validating a shortened depression scale (10 item CES-D)  
among HIV-positive people in British Columbia, Canada. *PloS one* 2012;7(7):e40793.  
45. Frost DM, Lehavot K, Meyer IH. Minority stress and physical health among sexual minority  
individuals. *Journal of behavioral medicine* 2015;38(1):1-8. doi: 10.1007/s10865-013-9523-8  
46. Gelman A, Hill J, Yajima M. Why we (usually) don't have to worry about multiple comparisons.  
*Journal of Research on Educational Effectiveness* 2012;5(2):189-211.

- 1  
2  
3 1 47. LGBT Consortium. The impact of COVID-19 on LGBT+ service delivery. London: LGBT Consortium,  
4 2 2020.  
5 3 48. National LGBT Cancer Network. Open Letter about Coronavirus and the LGBTQ+ Communities.  
6 4 Over 100 Organizations Ask Media & Health Officials to Weigh Added Risk. In: Network  
7 5 TNLC, ed. New York, NY, 2020.  
8  
9  
10 6  
11  
12 7  
13  
14 8  
15  
16 9  
17  
18 10  
19  
20 11  
21  
22 12  
23  
24 13  
25  
26 14  
27  
28 15  
29  
30 16  
31  
32 17  
33  
34 18  
35  
36 19  
37  
38  
39

## 40 Tables and Figures

41  
42 21 **Table 1: Mental health, experiences of discrimination, and sociodemographic**  
43 22 **characteristics of the Queerantime Study respondents**

|                                                                | Cis female<br>Gay/Lesbian | Cis female<br>of another<br>non-<br>heterosexua<br>l<br>orientation | Trans-<br>gender<br>and<br>Gender<br>Diverse<br>(TGGD) | Cis male<br>Gay | Cis male of<br>another<br>non-<br>heterosexua<br>l<br>orientation | Total             |
|----------------------------------------------------------------|---------------------------|---------------------------------------------------------------------|--------------------------------------------------------|-----------------|-------------------------------------------------------------------|-------------------|
|                                                                | %                         | %                                                                   | %                                                      | %               | %                                                                 | %                 |
| <b>Mental health outcomes</b>                                  |                           |                                                                     |                                                        |                 |                                                                   |                   |
| PSS-4 Score,<br>M(SD)                                          | 6.44<br>(3.18)            | 8.33<br>(3.14)                                                      | 8.96<br>(2.99)                                         | 7.03<br>(2.97)  | 9.00<br>(3.37)                                                    | 7.672<br>(3.218)  |
| CES-D-10 Score,<br>M(SD)                                       | 12.0<br>(6.65)            | 15.0<br>(5.86)                                                      | 17.15<br>(6.6)                                         | 12.75<br>(7.17) | 16.15<br>(7.5)                                                    | 14.174<br>(6.948) |
| <b>Evidence of significant<br/>depressive<br/>Symptomology</b> |                           |                                                                     |                                                        |                 |                                                                   |                   |
| No evidence (<10)                                              | 36.62                     | 18.33                                                               | 16.44                                                  | 38.71           | 15.38                                                             | 28.06             |



|                                                                 |               |               |               |               |               |               |
|-----------------------------------------------------------------|---------------|---------------|---------------|---------------|---------------|---------------|
| Evidence of significant depressive symptomology ( $\geq 10$ )   | 63.38         | 81.67         | 83.56         | 61.29         | 84.62         | 71.94         |
| <b>Any LGBTQ+ related harassment or inappropriate incidents</b> |               |               |               |               |               |               |
| None reported                                                   | 74.65         | 81.67         | 64.38         | 87.10         | 84.62         | 77.81         |
| Harassment reported <sup>s</sup>                                | 19.72         | 13.33         | 28.77         | 7.53          | 15.38         | 16.72         |
| No information (missing)                                        | 5.63          | 5.00          | 6.85          | 5.38          | 0             | 5.47          |
| <b>Age Group</b>                                                |               |               |               |               |               |               |
| 18-24                                                           | 9.86          | 18.33         | 31.51         | 2.15          | 30.77         | 15.11         |
| 25-34                                                           | 18.31         | 45.00         | 31.51         | 32.26         | 23.08         | 30.87         |
| 35-44                                                           | 39.44         | 23.33         | 16.44         | 31.18         | 23.08         | 27.65         |
| 45-54                                                           | 23.94         | 10.00         | 16.44         | 23.66         | 15.38         | 19.29         |
| 55+                                                             | 8.45          | 3.33          | 4.11          | 10.75         | 7.69          | 7.07          |
| <b>Identify as ethnic minority</b>                              |               |               |               |               |               |               |
| Not an ethnic minority                                          | 87.32         | 81.67         | 90.41         | 83.87         | 76.92         | 85.53         |
| Ethnic minority                                                 | 12.68         | 16.67         | 9.59          | 12.90         | 23.08         | 13.18         |
| Prefer Not to Say                                               | 0             | 1.67          | 0             | 3.23          | 0             | 1.29          |
| <b>Location</b>                                                 |               |               |               |               |               |               |
| UK                                                              | 81.69         | 80.00         | 82.19         | 90.32         | 76.92         | 83.60         |
| Rest of the world                                               | 18.31         | 20.00         | 17.81         | 9.68          | 23.08         | 16.40         |
| <b>Change in perceived social status</b>                        |               |               |               |               |               |               |
| Negative change in status                                       | 25.35         | 26.67         | 36.99         | 23.66         | 23.08         | 27.65         |
| No change                                                       | 52.11         | 43.33         | 35.62         | 51.61         | 61.54         | 46.95         |
| Positive change                                                 | 22.54         | 30.00         | 27.40         | 24.73         | 15.38         | 25.40         |
| Total                                                           |               |               |               |               |               | 100.00        |
| <b>Relationship status</b>                                      |               |               |               |               |               |               |
| Single                                                          | 21.13         | 25.00         | 42.47         | 19.35         | 23.08         | 26.37         |
| Dating or in a relationship but not living together             | 21.13         | 30.00         | 19.18         | 26.88         | 46.15         | 25.08         |
| Cohabiting/Married/Civil Partnership                            | 56.34         | 45.00         | 34.25         | 49.46         | 30.77         | 45.98         |
| Divorced, Widowed or Prefer Not to Say                          | 1.41          | 0             | 4.11          | 4.30          | 0             | 2.57          |
| <b>Total (%)</b>                                                | <b>100.00</b> | <b>100.00</b> | <b>100.00</b> | <b>100.00</b> | <b>100.00</b> | <b>100.00</b> |
| <b>Total (N)</b>                                                | <b>71</b>     | <b>60</b>     | <b>73</b>     | <b>93</b>     | <b>13</b>     | <b>310</b>    |

Notes: M = Mean; SD = Standard Deviation; <sup>s</sup> see methods for types of incidents

**Table 2: Logistic regression results for unadjusted and adjusted associations between gender identity/sexual orientation and discrimination during COVID-19 pandemic (Odds ratios and confidence intervals in brackets)**

|  | Experiences of discrimination |           |
|--|-------------------------------|-----------|
|  | Unadjusted                    | Adjusted  |
|  | O.R. (CI)                     | O.R. (CI) |

**Gender ID and Sex Orientation baseline: Transgender and gender diverse**

|                                                    |                             |                             |
|----------------------------------------------------|-----------------------------|-----------------------------|
| Cis female Gay/Lesbian                             | 0.576<br>(0.265 - 1.252)    | 0.743<br>(0.320 - 1.727)    |
| Cis female of another non-heterosexual orientation | 0.364**<br>(0.147 - 0.897)  | 0.361**<br>(0.141 - 0.921)  |
| Cis male gay                                       | 0.218***<br>(0.090 - 0.529) | 0.237***<br>(0.091 - 0.617) |
| Cis male of another non-heterosexual orientation   | 0.364<br>(0.075 - 1.765)    | 0.334<br>(0.066 - 1.704)    |

**Age group baseline: 18-24 years**

|                                                           |  |                            |
|-----------------------------------------------------------|--|----------------------------|
| 25-34 years                                               |  | 0.981<br>(0.411 - 2.347)   |
| 35-44 years                                               |  | 0.302**<br>(0.102 - 0.896) |
| 45-54 years                                               |  | 0.409<br>(0.139 - 1.205)   |
| 55+ years                                                 |  | 1.567<br>(0.474 - 5.188)   |
| <b>Ethnic minority (baseline: not an ethnic minority)</b> |  | 1.345<br>(0.520 - 3.484)   |
| <b>Location: Rest of the world (baseline: UK)</b>         |  | 0.530<br>(0.204 - 1.375)   |

|              |     |     |
|--------------|-----|-----|
| Observations | 295 | 295 |
|--------------|-----|-----|

\*\*\* p<0.01, \*\* p<0.05, \* p<0.1; O.R: Odds Ratio; CI: Confidence Interval

**Table 3: Results of unadjusted and adjusted OLS Regression for PSS-4 score (Models 1 and 2; regression coefficients and confidence intervals in brackets) and unadjusted and adjusted logistic regression results for odds of significant depressive symptomology indicated by CES-D-10 scores ≥10 (Models 3 and 4; odds ratios and confidence intervals in brackets)**

|  | PSS-4 score         |                   | CES-D-10 scores ≥10     |                       |
|--|---------------------|-------------------|-------------------------|-----------------------|
|  | Unadjusted<br>B(CI) | Adjusted<br>B(CI) | Unadjusted<br>O.R. (CI) | Adjusted<br>O.R. (CI) |

Any harassment or inappropriate incidents

|    |                                      |                                                                                            |                    |                 |                 |
|----|--------------------------------------|--------------------------------------------------------------------------------------------|--------------------|-----------------|-----------------|
| 1  |                                      |                                                                                            |                    |                 |                 |
| 2  |                                      |                                                                                            |                    |                 |                 |
| 3  | baseline: None                       |                                                                                            |                    |                 |                 |
| 4  | Form of harassment reported          | 1.882***                                                                                   | 1.436***           | 4.228***        | 3.252**         |
| 5  |                                      | (0.957 - 2.807)                                                                            | (0.517 - 2.354)    | (1.582 - 11.30) | (1.168 - 9.052) |
| 6  | No information                       | -0.378                                                                                     | -0.756             | 2.325           | 1.796           |
| 7  |                                      | (-1.863 - 1.108)                                                                           | (-2.198 - 0.686)   | (0.634 - 8.520) | (0.456 - 7.074) |
| 8  | <b>Gender ID and Sex</b>             |                                                                                            |                    |                 |                 |
| 9  | <b>Orientation baseline: Cis</b>     |                                                                                            |                    |                 |                 |
| 10 | <b>female Gay/Lesbian</b>            |                                                                                            |                    |                 |                 |
| 11 |                                      |                                                                                            |                    |                 |                 |
| 12 | Cis female of another non-           | 2.014***                                                                                   | 1.367***           | 2.881**         | 2.154*          |
| 13 | heterosexual orientation             | (0.977 - 3.052)                                                                            | (0.345 - 2.389)    | (1.257 - 6.604) | (0.890 - 5.210) |
| 14 | Transgender and gender               | 2.357***                                                                                   | 1.561***           | 2.748**         | 1.904           |
| 15 | diverse                              | (1.369 - 3.345)                                                                            | (0.570 - 2.552)    | (1.231 - 6.134) | (0.791 - 4.580) |
| 16 | Cis male gay                         | 0.824*                                                                                     | 0.769*             | 1.061           | 0.986           |
| 17 |                                      | (-0.113 - 1.761)                                                                           | (-0.145 - 1.683)   | (0.550 - 2.046) | (0.487 - 1.998) |
| 18 | Cis male of another non-             | 2.624***                                                                                   | 1.982**            | 3.626           | 2.553           |
| 19 | heterosexual orientation             | (0.840 - 4.407)                                                                            | (0.255 - 3.709)    | (0.732 - 17.97) | (0.481 - 13.56) |
| 20 | <b>Age group baseline: 18-24</b>     |                                                                                            |                    |                 |                 |
| 21 | <b>years</b>                         |                                                                                            |                    |                 |                 |
| 22 | 25-34 years                          |                                                                                            | -1.070**           |                 | 0.558           |
| 23 |                                      |                                                                                            | (-2.127 - -0.0125) |                 | (0.182 - 1.713) |
| 24 | 35-44 years                          |                                                                                            | -1.995***          |                 | 0.480           |
| 25 |                                      |                                                                                            | (-3.094 - -0.897)  |                 | (0.157 - 1.470) |
| 26 | 45-54 years                          |                                                                                            | -2.401***          |                 | 0.309**         |
| 27 |                                      |                                                                                            | (-3.574 - -1.228)  |                 | (0.098 - 0.974) |
| 28 | 55+ years                            |                                                                                            | -3.384***          |                 | 0.361           |
| 29 |                                      |                                                                                            | (-4.907 - -1.860)  |                 | (0.089 - 1.469) |
| 29 | <b>Change in social status since</b> |                                                                                            |                    |                 |                 |
| 30 | <b>pandemic baseline: positive</b>   |                                                                                            |                    |                 |                 |
| 31 | <b>change</b>                        |                                                                                            |                    |                 |                 |
| 32 | Negative change in status            |                                                                                            | 1.375***           |                 | 1.653           |
| 33 |                                      |                                                                                            | (0.478 - 2.272)    |                 | (0.747 - 3.657) |
| 34 | No change                            |                                                                                            | 0.217              |                 | 0.882           |
| 35 |                                      |                                                                                            | (-0.590 - 1.025)   |                 | (0.452 - 1.719) |
| 36 | <b>Relationship status baseline:</b> |                                                                                            |                    |                 |                 |
| 37 | <b>Single</b>                        |                                                                                            |                    |                 |                 |
| 38 | Dating or in a relationship but      |                                                                                            | 0.225              |                 | 0.953           |
| 39 | not living together                  |                                                                                            | (-0.682 - 1.132)   |                 | (0.410 - 2.211) |
| 40 | Cohabiting/Married/Civil             |                                                                                            | -0.332             |                 | 0.499*          |
| 41 | Partner                              |                                                                                            | (-1.159 - 0.496)   |                 | (0.244 - 1.018) |
| 42 | Divorced, Widowed or Prefer          |                                                                                            | -0.328             |                 | 0.625           |
| 43 | not to say                           |                                                                                            | (-2.463 - 1.806)   |                 | (0.119 - 3.282) |
| 44 | <b>Ethnicity baseline: not an</b>    |                                                                                            |                    |                 |                 |
| 45 | <b>ethnic minority</b>               |                                                                                            |                    |                 |                 |
| 46 | Ethnic Minority                      |                                                                                            | -0.378             |                 | 1.525           |
| 47 |                                      |                                                                                            | (-1.353 - 0.598)   |                 | (0.642 - 3.626) |
| 48 | Prefer not to say                    |                                                                                            | 1.621              |                 | 1.778           |
| 49 |                                      |                                                                                            | (-1.272 - 4.515)   |                 | (0.159 - 19.85) |
| 49 | <b>Location: Rest of the world</b>   |                                                                                            | -0.0235            |                 | 1.076           |
| 50 | <b>(baseline: UK)</b>                |                                                                                            |                    |                 |                 |
| 51 |                                      |                                                                                            | (-0.916 - 0.869)   |                 | (0.496 - 2.332) |
| 52 |                                      |                                                                                            |                    |                 |                 |
| 53 |                                      |                                                                                            |                    |                 |                 |
| 54 | Constant                             | 6.087***                                                                                   | 7.774***           |                 |                 |
| 55 |                                      | (5.355 - 6.818)                                                                            | (6.420 - 9.128)    |                 |                 |
| 56 |                                      |                                                                                            |                    |                 |                 |
| 57 | Observations                         | 310                                                                                        | 310                | 310             | 310             |
| 58 | R-squared                            | 0.147                                                                                      | 0.263              |                 |                 |
| 59 | 1                                    | *** p<0.01, ** p<0.05, * p<0.1; B: Regression coefficient; O.R: Odds Ratio; CI: Confidence |                    |                 |                 |
| 60 | 2                                    | Interval                                                                                   |                    |                 |                 |

1  
2  
3  
4  
5  
6  
7  
8  
9  
10  
11  
12  
13  
14  
15  
16  
17  
18  
19  
20  
21  
22  
23  
24  
25  
26  
27  
28  
29  
30  
31  
32  
33  
34  
35  
36  
37  
38  
39  
40  
41  
42  
43  
44  
45  
46  
47  
48  
49  
50  
51  
52  
53  
54  
55  
56  
57  
58  
59  
60

1  
2  
3  
4

For peer review only

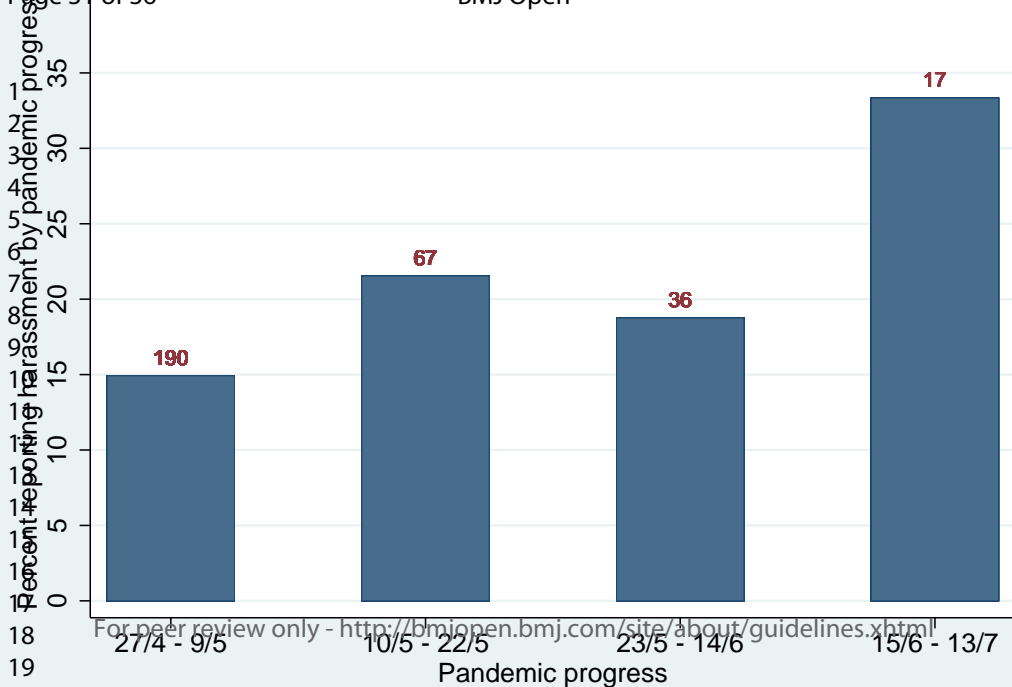

## Supplementary Materials

### Supplementary Table 1 – Further breakdown of respondents' identities

|                                        | Cisgender<br>Female | Cisgender<br>Male | Transgender<br>Female | Transgender<br>Male | Non-binary<br>or identify<br>with another<br>gender (e.g.<br>agender) | Total |
|----------------------------------------|---------------------|-------------------|-----------------------|---------------------|-----------------------------------------------------------------------|-------|
| <b>Straight-heterosexual</b>           | 0                   | 0                 | 1                     | 0                   | 0                                                                     | 1     |
| <b>Gay/Lesbian</b>                     | 71                  | 93                | 2                     | 2                   | 17                                                                    | 185   |
| <b>Bisexual</b>                        | 42                  | 5                 | 4                     | 3                   | 12                                                                    | 66    |
| <b>Queer</b>                           | 8                   | 5                 | 3                     | 1                   | 8                                                                     | 25    |
| <b>Asexual</b>                         | 3                   | 0                 | 0                     | 1                   | 5                                                                     | 9     |
| <b>Identify with another sexuality</b> | 6                   | 1                 | 2                     | 0                   | 8                                                                     | 17    |
| <b>Prefer not to say</b>               | 0                   | 2                 | 1                     | 0                   | 3                                                                     | 6     |
| <b>Don't Know</b>                      | 1                   | 0                 | 0                     | 0                   | 0                                                                     | 1     |
| <b>Total</b>                           | 131                 | 106               | 13                    | 7                   | 53                                                                    | 310   |

### Supplementary Table 2 – Further breakdown of respondents' identities and mean PSS scores (standard deviation in brackets)

|                                        | Cisgender<br>Female | Cisgender<br>Male | Transgender<br>Female | Transgender<br>Male | Non-binary<br>or identify<br>with another<br>gender (e.g.<br>agender) | Total          |
|----------------------------------------|---------------------|-------------------|-----------------------|---------------------|-----------------------------------------------------------------------|----------------|
| <b>Straight-heterosexual</b>           | /                   | /                 | /                     | /                   | /                                                                     | /              |
| <b>Gay/Lesbian</b>                     | 6.43<br>(3.18)      | 7.03<br>(2.97)    | /                     | /                   | 7.71<br>(3.51)                                                        | 6.92<br>(3.11) |
| <b>Bisexual</b>                        | 8.36<br>(3.27)      | 9.20<br>(3.70)    | /                     | /                   | 9.33<br>(2.93)                                                        | 6.00<br>(3.31) |
| <b>Queer</b>                           | 9.00<br>(2.00)      | 8.8<br>(3.27)     | /                     | /                   | 10.38<br>(1.77)                                                       | 9.36<br>(2.58) |
| <b>Asexual</b>                         | /                   | /                 | /                     | /                   | 10.00<br>(2.24)                                                       | 9.78<br>(1.92) |
| <b>Identify with another sexuality</b> | 7.67<br>(3.33)      | /                 | /                     | /                   | 9.88<br>(2.59)                                                        | 8.88<br>(2.85) |

|                          |                |                |                |                |                |                |
|--------------------------|----------------|----------------|----------------|----------------|----------------|----------------|
| <b>Prefer not to say</b> | /              | /              | /              | /              | /              | 9.00<br>(3.27) |
| <b>Don't Know</b>        | /              | /              | /              | /              | /              | /              |
| <b>Total</b>             | 7.31<br>(3.29) | 7.27<br>(3.07) | 8.46<br>(3.31) | 9.00<br>(2.94) | 9.08<br>(2.97) | 7.68<br>(3.22) |

Notes: values for cells with less than 5 respondents suppressed

#### Supplementary Table 3 – Further breakdown of respondents' identities and proportion with CESD-D-10 scores suggesting significant depressive symptomology

|                                        | Cisgender Female | Cisgender Male | Transgender Female | Transgender Male | Non-binary or identify with another gender (e.g. agender) | Total  |
|----------------------------------------|------------------|----------------|--------------------|------------------|-----------------------------------------------------------|--------|
| <b>Straight-heterosexual</b>           | /                | /              | /                  | /                | /                                                         | /      |
| <b>Gay/Lesbian</b>                     | 63.4%            | 61.3%          | /                  | /                | 82.4%                                                     | 64.3%  |
| <b>Bisexual</b>                        | 80.9%            | 80.0%          | /                  | /                | 91.7%                                                     | 80.3%  |
| <b>Queer</b>                           | 100.0%           | 100.0%         | /                  | /                | 87.5%                                                     | 96.0%  |
| <b>Asexual</b>                         | /                | /              | /                  | /                | 100.0%                                                    | 100.0% |
| <b>Identify with another sexuality</b> | 66.7%            | 100.0%         | /                  | /                | 75.0%                                                     | 70.6%  |
| <b>Prefer not to say</b>               | /                | /              | /                  | /                | /                                                         | 83.3%  |
| <b>Don't Know</b>                      | /                | /              | /                  | /                | /                                                         | /      |
| <b>Total</b>                           | 71.8%            | 64.2%          | 76.9%              | 71.4%            | 86.8%                                                     | 71.9%  |

Notes: values for cells with less than 5 respondents suppressed

#### Supplementary Table 4 – Continuous model estimates of CES-D-10

|                                                     | Unadjusted<br>B(SE) | Adjusted<br>B(SE) |
|-----------------------------------------------------|---------------------|-------------------|
| Any harassment or inappropriate incidents baseline: |                     |                   |
| None                                                |                     |                   |

|    |                                                           |                  |                   |
|----|-----------------------------------------------------------|------------------|-------------------|
| 1  |                                                           |                  |                   |
| 2  |                                                           |                  |                   |
| 3  | Form of harassment reported                               | 3.875***         | 2.700**           |
| 4  |                                                           | (1.852 - 5.899)  | (0.644 - 4.756)   |
| 5  | No information                                            | 0.257            | -0.623            |
| 6  |                                                           | (-2.992 - 3.507) | (-3.852 - 2.606)  |
| 7  |                                                           |                  |                   |
| 8  | <b>Gender ID and Sex Orientation baseline: Cis female</b> |                  |                   |
| 9  | <b>Gay/Lesbian</b>                                        |                  |                   |
| 10 |                                                           |                  |                   |
| 11 | Cis female of another non-heterosexual orientation        | 3.249***         | 2.132*            |
| 12 |                                                           | (0.981 - 5.518)  | (-0.156 - 4.420)  |
| 13 | Transgender and gender diverse                            | 4.797***         | 3.383***          |
| 14 |                                                           | (2.636 - 6.958)  | (1.164 - 5.602)   |
| 15 | Cis male gay                                              | 1.226            | 1.027             |
| 16 |                                                           | (-0.824 - 3.276) | (-1.020 - 3.074)  |
| 17 | Cis male of another non-heterosexual orientation          | 4.336**          | 2.781             |
| 18 |                                                           | (0.435 - 8.238)  | (-1.087 - 6.648)  |
| 19 |                                                           |                  |                   |
| 20 | <b>Age group baseline: 18-24 years</b>                    |                  |                   |
| 21 | 25-34 years                                               |                  | -1.932            |
| 22 |                                                           |                  | (-4.299 - 0.436)  |
| 23 | 35-44 years                                               |                  | -2.899**          |
| 24 |                                                           |                  | (-5.359 - -0.439) |
| 25 | 45-54 years                                               |                  | -4.453***         |
| 26 |                                                           |                  | (-7.080 - -1.826) |
| 27 | 55+ years                                                 |                  | -3.974**          |
| 28 |                                                           |                  | (-7.385 - -0.564) |
| 29 |                                                           |                  |                   |
| 30 |                                                           |                  |                   |
| 31 | <b>Change in social status since pandemic baseline:</b>   |                  |                   |
| 32 | <b>positive change</b>                                    |                  |                   |
| 33 | Negative change in status                                 |                  | 2.649***          |
| 34 |                                                           |                  | (0.641 - 4.658)   |
| 35 | No change                                                 |                  | 0.746             |
| 36 |                                                           |                  | (-1.061 - 2.554)  |
| 37 |                                                           |                  |                   |
| 38 | <b>Relationship status baseline: Single</b>               |                  |                   |
| 39 | Dating or in a relationship but not living together       |                  | 0.440             |
| 40 |                                                           |                  | (-1.591 - 2.472)  |
| 41 | Cohabiting/Married/Civil Partner                          |                  | -1.979**          |
| 42 |                                                           |                  | (-3.831 - -0.127) |
| 43 | Divorced, Widowed or Prefer not to say                    |                  | 0.416             |
| 44 |                                                           |                  | (-4.364 - 5.196)  |
| 45 |                                                           |                  |                   |
| 46 | <b>Ethnicity baseline: not an ethnic minority</b>         |                  |                   |
| 47 | Ethnic Minority                                           |                  | 0.404             |
| 48 |                                                           |                  | (-1.780 - 2.587)  |
| 49 | Prefer not to say                                         |                  | 1.076             |
| 50 |                                                           |                  | (-5.403 - 7.556)  |
| 51 | <b>Location: Rest of the world (baseline: UK)</b>         |                  | -0.0193           |
| 52 |                                                           |                  | (-2.018 - 1.980)  |
| 53 |                                                           |                  |                   |
| 54 |                                                           |                  |                   |
| 55 |                                                           |                  |                   |
| 56 | Constant                                                  | 11.22***         | 14.31***          |
| 57 |                                                           | (9.622 - 12.82)  | (11.28 - 17.34)   |
| 58 |                                                           |                  |                   |
| 59 | Observations                                              | 310              | 310               |
| 60 |                                                           |                  |                   |



| R-squared | 0.126 | 0.208 |
|-----------|-------|-------|
|-----------|-------|-------|

\*\*\* p<0.01, \*\* p<0.05, \* p<0.1

## Supplementary materials – further notes on measures of harassment and discrimination

Respondents were asked:

Since the start of the coronavirus pandemic, have you experienced any of the following in your day-to-day life (going to the shops, walking around the neighbourhood, etc...) because you are LGBTQ+ or others thought you were LGBTQ+?

- verbal harassment, insults or other hurtful comments;
- physical harassment or violence;
- sexual harassment or violence;
- threat of physical or sexual harassment or violence;
- exclusion from events or activities;
- someone disclosing that you are LGBTQ+ to others without your permission;
- any other inappropriate comments or conduct not listed above (please state).
- None

Respondents were free to select multiple options in terms of forms of discrimination.

STROBE Statement—Checklist of items that should be included in reports of *cross-sectional studies*

|                              | Item No | Recommendation                                                                                                                                                                                    | Page No       |
|------------------------------|---------|---------------------------------------------------------------------------------------------------------------------------------------------------------------------------------------------------|---------------|
| <b>Title and abstract</b>    | 1       | (a) Indicate the study's design with a commonly used term in the title or the abstract                                                                                                            | 1             |
|                              |         | (b) Provide in the abstract an informative and balanced summary of what was done and what was found                                                                                               | 2             |
| <b>Introduction</b>          |         |                                                                                                                                                                                                   |               |
| Background/rationale         | 2       | Explain the scientific background and rationale for the investigation being reported                                                                                                              | 4-7           |
| Objectives                   | 3       | State specific objectives, including any prespecified hypotheses                                                                                                                                  | 7             |
| <b>Methods</b>               |         |                                                                                                                                                                                                   |               |
| Study design                 | 4       | Present key elements of study design early in the paper                                                                                                                                           | 7-10          |
| Setting                      | 5       | Describe the setting, locations, and relevant dates, including periods of recruitment, exposure, follow-up, and data collection                                                                   | 7-8           |
| Participants                 | 6       | (a) Give the eligibility criteria, and the sources and methods of selection of participants                                                                                                       | 7             |
| Variables                    | 7       | Clearly define all outcomes, exposures, predictors, potential confounders, and effect modifiers. Give diagnostic criteria, if applicable                                                          | 8-10          |
| Data sources/<br>measurement | 8*      | For each variable of interest, give sources of data and details of methods of assessment (measurement). Describe comparability of assessment methods if there is more than one group              | 8-10          |
| Bias                         | 9       | Describe any efforts to address potential sources of bias                                                                                                                                         | 10-<br>12,19  |
| Study size                   | 10      | Explain how the study size was arrived at                                                                                                                                                         | 7-8           |
| Quantitative variables       | 11      | Explain how quantitative variables were handled in the analyses. If applicable, describe which groupings were chosen and why                                                                      | 10-12         |
| Statistical methods          | 12      | (a) Describe all statistical methods, including those used to control for confounding                                                                                                             | 10-12         |
|                              |         | (b) Describe any methods used to examine subgroups and interactions                                                                                                                               |               |
|                              |         | (c) Explain how missing data were addressed                                                                                                                                                       | 10-12         |
|                              |         | (d) If applicable, describe analytical methods taking account of sampling strategy                                                                                                                |               |
|                              |         | (e) Describe any sensitivity analyses                                                                                                                                                             | 8             |
| <b>Results</b>               |         |                                                                                                                                                                                                   |               |
| Participants                 | 13*     | (a) Report numbers of individuals at each stage of study—eg numbers potentially eligible, examined for eligibility, confirmed eligible, included in the study, completing follow-up, and analysed | 12            |
|                              |         | (b) Give reasons for non-participation at each stage                                                                                                                                              | 12            |
|                              |         | (c) Consider use of a flow diagram                                                                                                                                                                |               |
| Descriptive data             | 14*     | (a) Give characteristics of study participants (eg demographic, clinical, social) and information on exposures and potential confounders                                                          | 12, 25-<br>26 |
|                              |         | (b) Indicate number of participants with missing data for each variable of interest                                                                                                               | 12            |
| Outcome data                 | 15*     | Report numbers of outcome events or summary measures                                                                                                                                              | 12, 25-<br>26 |

1  
2  
3  
4  
5  
6  
7  
8  
9  
10  
11  
12  
13  
14  
15  
16  
17  
18  
19  
20  
21  
22  
23  
24  
25  
26  
27  
28  
29  
30  
31  
32  
33  
34  
35  
36  
37  
38  
39  
40  
41  
42  
43  
44  
45  
46  
47  
48  
49  
50  
51  
52  
53  
54  
55  
56  
57  
58  
59  
60

|                          |    |                                                                                                                                                                                                              |              |
|--------------------------|----|--------------------------------------------------------------------------------------------------------------------------------------------------------------------------------------------------------------|--------------|
| Main results             | 16 | (a) Give unadjusted estimates and, if applicable, confounder-adjusted estimates and their precision (eg, 95% confidence interval). Make clear which confounders were adjusted for and why they were included | 12-15, 26-28 |
|                          |    | (b) Report category boundaries when continuous variables were categorized                                                                                                                                    | 12-15, 26-28 |
|                          |    | (c) If relevant, consider translating estimates of relative risk into absolute risk for a meaningful time period                                                                                             |              |
| Other analyses           | 17 | Report other analyses done—eg analyses of subgroups and interactions, and sensitivity analyses                                                                                                               |              |
| <b>Discussion</b>        |    |                                                                                                                                                                                                              |              |
| Key results              | 18 | Summarise key results with reference to study objectives                                                                                                                                                     | 15-17        |
| Limitations              | 19 | Discuss limitations of the study, taking into account sources of potential bias or imprecision. Discuss both direction and magnitude of any potential bias                                                   | 17-20        |
| Interpretation           | 20 | Give a cautious overall interpretation of results considering objectives, limitations, multiplicity of analyses, results from similar studies, and other relevant evidence                                   | 20-21        |
| Generalisability         | 21 | Discuss the generalisability (external validity) of the study results                                                                                                                                        | 19           |
| <b>Other information</b> |    |                                                                                                                                                                                                              |              |
| Funding                  | 22 | Give the source of funding and the role of the funders for the present study and, if applicable, for the original study on which the present article is based                                                | 21           |

\*Give information separately for exposed and unexposed groups.

**Note:** An Explanation and Elaboration article discusses each checklist item and gives methodological background and published examples of transparent reporting. The STROBE checklist is best used in conjunction with this article (freely available on the Web sites of PLoS Medicine at <http://www.plosmedicine.org/>, Annals of Internal Medicine at <http://www.annals.org/>, and Epidemiology at <http://www.epidem.com/>). Information on the STROBE Initiative is available at [www.strobe-statement.org](http://www.strobe-statement.org).

# BMJ Open

## Discrimination as a predictor of mental health issues among LGBTQ+ people during the COVID-19 pandemic: cross-sectional analysis of the online Queerantime Study

|                                 |                                                                                                                                                          |
|---------------------------------|----------------------------------------------------------------------------------------------------------------------------------------------------------|
| Journal:                        | <i>BMJ Open</i>                                                                                                                                          |
| Manuscript ID                   | bmjopen-2021-049405.R2                                                                                                                                   |
| Article Type:                   | Original research                                                                                                                                        |
| Date Submitted by the Author:   | 26-May-2021                                                                                                                                              |
| Complete List of Authors:       | Kneale, Dylan; University College London, EPPI-Centre, UCL Social Research Institute<br>Becares, Laia; University of Sussex, Social Work and Social Care |
| <b>Primary Subject Heading</b>: | Public health                                                                                                                                            |
| Secondary Subject Heading:      | Mental health, Sociology                                                                                                                                 |
| Keywords:                       | COVID-19, MENTAL HEALTH, SOCIAL MEDICINE                                                                                                                 |
|                                 |                                                                                                                                                          |

SCHOLARONE™  
Manuscripts



I, the Submitting Author has the right to grant and does grant on behalf of all authors of the Work (as defined in the below author licence), an exclusive licence and/or a non-exclusive licence for contributions from authors who are: i) UK Crown employees; ii) where BMJ has agreed a CC-BY licence shall apply, and/or iii) in accordance with the terms applicable for US Federal Government officers or employees acting as part of their official duties; on a worldwide, perpetual, irrevocable, royalty-free basis to BMJ Publishing Group Ltd ("BMJ") its licensees and where the relevant Journal is co-owned by BMJ to the co-owners of the Journal, to publish the Work in this journal and any other BMJ products and to exploit all rights, as set out in our [licence](#).

The Submitting Author accepts and understands that any supply made under these terms is made by BMJ to the Submitting Author unless you are acting as an employee on behalf of your employer or a postgraduate student of an affiliated institution which is paying any applicable article publishing charge ("APC") for Open Access articles. Where the Submitting Author wishes to make the Work available on an Open Access basis (and intends to pay the relevant APC), the terms of reuse of such Open Access shall be governed by a Creative Commons licence – details of these licences and which [Creative Commons](#) licence will apply to this Work are set out in our licence referred to above.

Other than as permitted in any relevant BMJ Author's Self Archiving Policies, I confirm this Work has not been accepted for publication elsewhere, is not being considered for publication elsewhere and does not duplicate material already published. I confirm all authors consent to publication of this Work and authorise the granting of this licence.

# Discrimination as a predictor of mental health issues among LGBTQ+ people during the COVID-19 pandemic: cross-sectional analysis of the online Queerantime Study

Dylan Kneale<sup>1</sup> and Laia Bécaries<sup>2,\*</sup>

<sup>1</sup> EPPI-Centre, UCL Social Research Institute, University College London

<sup>2</sup> School of Education and Social Work, University of Sussex

\*Joint first authors. Address correspondence to DK or LB

## Corresponding Author:

**Dylan Kneale**

EPPI-Centre, UCL Social Research Institute, University College London, London, UK

Email: [D.Kneale@ucl.ac.uk](mailto:D.Kneale@ucl.ac.uk)

**Laia Bécaries**

University of Sussex, Social Work and Social Care, 229A Essex House, Falmer, Sussex, UK  
BN1 9RH

Email: [L.Becaries@sussex.ac.uk](mailto:L.Becaries@sussex.ac.uk)

## Abstract

**Objectives:** To assess the mental health and experiences of discrimination amongst Lesbian, Gay, Bisexual, Transgender, Queer people (LGBTQ) at the start of the COVID-19 pandemic.

**Design:** Data come from a cross-sectional online survey targeted at LGBTQ+ people, which collected data on mental health, experiences of discrimination, and a number of other pandemic-related experiences. To examine the association between sexual orientation and gender, and mental health and experiences of discrimination, we conducted regression analyses that adjusted for a range of sociodemographic variables.

**Setting:** A web-based survey was used to collect data between the end of April and mid-July 2020.

**Participants:** An analytical sample of 310 LGBTQ+ respondents aged 18 and over.

**Main outcome measures:** We assessed mental health with the 4-item Perceived Stress Scale (PSS-4), and with the 10-item Center for Epidemiological Studies Depression scale (CES-D-10). We asked respondents about discriminatory experiences because of their LGBTQ+ identity during the coronavirus pandemic.

**Results:** Perceived stress scores among our LGBTQ+ sample were high (Mean: 7.67; Standard Deviation: 3.22). Based on a score of ten or over on the CES-D-10, the majority of participants had high levels of depressive symptoms (72%). Around one-in-six respondents reported some form of discrimination since the start of the pandemic because they were LGBTQ+ (16.7%). The average score for perceived stress increased by 1.44 points (95% Confidence Interval (CI): 0.517-2.354) for respondents who had experienced discrimination versus those who had not. Similarly, the odds of exhibiting significant depressive symptomology increased three-fold among those who had experienced discrimination compared to those who had not (OR: 3.251; 95% CI: 1.168-9.052).

**Conclusions:** The LGBTQ+ community exhibited increased levels of depression, stress, and experienced discrimination during the coronavirus pandemic. Increased levels of poor mental health were partially explained by experiences of discrimination which had a large, consistent and pernicious impact on mental health.

**Keywords:** COVID-19; LGBTQ+; mental health; stress; discrimination.

### Article summary – strengths and limitations of this study

- This study uses tools that have been validated among diverse populations to identify high levels of perceived stress and depressive symptoms among LGBTQ+ people.
- An online convenience sample was deemed appropriate for a number of reasons including the inherent risk of transmission of COVID-19 with methods involving physical contact and to better include respondents who were sheltering or shielding in households where their LGBTQ+ status was concealed .
- An online convenience sample can introduce issues around representativeness and the possibility that those with greater mental health issues self-selected into the survey.
- Due to relatively small sample sizes, we have not been able to fully examine the diversity of the LGBTQ+ community.
- Designing a survey that captured LGBTQ+ specific experiences allowed us to identify that sexuality- and gender-based discrimination experienced during the pandemic is an important predictor of mental health issues.



## 1 Introduction

2 The coronavirus pandemic has exposed and magnified existent societal and health inequities  
3 operating across multiple and intersecting systems of oppression.<sup>1 2</sup> Given documented stark  
4 health and socioeconomic inequalities across social locations related to sexuality, and gender  
5 expression and identity,<sup>3</sup> the coronavirus disease (COVID-19) and subsequent social and  
6 economic implications could be expected to have disproportionate impacts on Lesbian, Gay,  
7 Bisexual, Transgender, and Queer people (LGBTQ+, the “plus” including those who identify  
8 as non-heterosexual and/or non-cisgender in another way).

9  
10 Higher levels of pre-existing health conditions compared to cisgender and heterosexual  
11 populations, may place the LGBTQ+ community at additional risk of adverse prognosis if  
12 diagnosed with COVID-19. This includes long-term chronic illness, and higher rates of  
13 smoking and asthma among LGBTQ+ people;<sup>4-7</sup> higher rates of obesity, and alcohol  
14 consumption among lesbian, bisexual, and queer women;<sup>7-9</sup> and increased likelihood of  
15 being immunocompromised (e.g. HIV+ with a low CD4 cell count or with untreated HIV)  
16 among gay men and transgender people.<sup>10</sup> In addition, the impacts of social distancing and  
17 lockdown may be felt acutely by LGBTQ+ people, who were at greater risk of poorer mental  
18 health prior to the pandemic including higher risks of suicide attempts and suicidal ideation,  
19 higher levels of common mental disorders, and lower levels of mental wellbeing.<sup>11 12 13</sup> For  
20 example, studies using the 4-item Perceived Stress Score (PSS-4), a measure used in the  
21 present study (see methods), have found mean values have ranged between 6.75 and 7.43 for  
22 US college students who identified as ‘homosexual’ and bisexual respectively, compared to  
23 6.09 among heterosexual students.<sup>14</sup> Similarly, studies examining depression using the  
24 Center for Epidemiological Studies Depression Scale (CES-D-10), a measure of depressive  
25 symptomatology used in the present study (see methods), have found that the proportion

1 reporting substantial depressive symptomology among African American LGB young people  
2 to stand at roughly double that of heterosexual young people in the southern United States  
3 (56.1% vs 28.4%).<sup>15</sup> Comparative data on LGBTQ+ experiences during the pandemic are  
4 rare, although in the UK general population the average stress score (using the PSS-4 scale)  
5 was estimated to be 6.48 (Standard Deviation: 3.3),<sup>16</sup> above a 6-point threshold used to  
6 indicate 'high' levels of stress elsewhere.<sup>17</sup> Estimates within the general (US) population  
7 during the COVID-19 pandemic have suggested that up to a third of people may be  
8 experiencing substantial depressive symptomology (using the CES-D-10 scale).<sup>18</sup>

9  
10 Within the heterogeneous LGBTQ+ umbrella term, individual groups may be positioned at a  
11 distinct disadvantage. Transgender and gender-diverse (TGGD) individuals have a gender  
12 that differs from the culturally-bound gender associated with one's assigned birth.<sup>19</sup> TGGD  
13 people are known to experience higher rates of adverse mental health compared to cisgender  
14 individuals (people whose gender matches their sex assigned at birth), particularly anxiety,  
15 depression, and suicidality.<sup>5 6 20</sup>

16  
17 Despite the accumulation of evidence indicating poorer health among LGBTQ+ people  
18 predating the pandemic, there is a dearth of information on whether the hypothesised  
19 additional risks outlined above have actually materialised in poorer outcomes among  
20 LGBTQ+ people during the COVID-19 pandemic. Indicative evidence suggests that some  
21 LGBTQ+ groups may exhibit higher levels of depression and stress during the COVID-19  
22 pandemic<sup>21</sup> and other studies suggest that mental health among LGBTQ+ people may have  
23 deteriorated during the pandemic compared to pre-pandemic levels.<sup>22</sup> However, while some  
24 studies indicate that LGBTQ+ people may be more susceptible to stress and depression  
25 during the COVID-19 pandemic, this has been largely attributed to existing inequalities in

1  
2  
3 1 mental health status, with differences attenuating once pre-pandemic levels of mental health  
4  
5 2 are accounted for <sup>21</sup>. In other words, although absolute differences in mental health status  
6  
7 3 may be observed, there are few differences between the way in which LGBTQ+ and  
8  
9  
10 4 cisgender-heterosexual people's mental health changed during the pandemic <sup>23</sup>. The findings  
11  
12 5 from these studies are a cause of concern in of themselves, given that the lockdown entailed a  
13  
14 6 separation from social networks and formal support that could help people in managing  
15  
16 7 mental health issues. However these studies, which drew on samples of both LGBTQ+ and  
17  
18 8 cisgender-heterosexual respondents, did not account for other risk factors for mental health  
19  
20 9 that may have continued and intensified in potency during the pandemic and resulting  
21  
22 10 lockdown for LGBTQ+ people. Mental health inequalities during and predating the pandemic  
23  
24 11 are a product of complex processes of discrimination and exclusion <sup>24 25</sup>, and examinations of  
25  
26 12 LGBTQ+ mental health that do not examine these process may provide an incomplete  
27  
28 13 understanding of how LGBTQ+ people have fared during the pandemic.  
29  
30  
31 14 Certainly, LGBTQ+ people face stressors during the pandemic that are not shared with  
32  
33 15 heterosexual and cisgender people, including spending periods of 'lockdown' in households  
34  
35 16 that are not affirming or supportive of their sexual orientation or gender identity or  
36  
37 17 expression, <sup>26</sup> being separated from social networks that are supportive and affirming to their  
38  
39 18 identity, <sup>27 28</sup> and interruptions to accessing gender affirming care among transgender and  
40  
41 19 gender non-binary people <sup>29 30</sup>. Theoretical frameworks including the Minority Stress Model  
42  
43 20 suggest that stark health inequalities are the result of distal and proximal stressors caused by  
44  
45 21 living within a homophobic, heterosexist, transphobic culture, results in cumulative  
46  
47 22 experiences of discrimination, harassment, victimization, expectations of rejection, and  
48  
49 23 internalized transphobia and homophobia. <sup>24 25</sup> These experiences have been extensively  
50  
51 24 documented across several studies, where high prevalence of experiences of stigma and  
52  
53 25 discrimination has been reported among the LGBTQ+ community. <sup>31 32</sup> During the pandemic,  
54  
55  
56  
57  
58  
59  
60

1 experiences of discrimination may have become magnified because, as described above,  
2 LGBTQ+ people may have been sheltering in households that were unsupportive or hostile  
3 towards their identities,<sup>26</sup> or have not received support from networks and relevant  
4 organisations. In some contexts, the pandemic has triggered a rise in hate speech and targeted  
5 attacks on the LGBTQ+ community, and members of the LGBTQ+ community have been  
6 blamed for the very emergence of the virus.<sup>33</sup> Unrelated to the coronavirus itself, the  
7 lockdown coincided with online debates around sex and gender, which have manifested in  
8 transphobic comments made and supported by high profile figures, and a hostile online  
9 environment for many transgender people.<sup>34</sup> These attacks occurred at a time when many in  
10 the community were unable to draw on their usual support networks.

11  
12 In the context of the coronavirus pandemic where existent inequalities are being exacerbated  
13 across social locations,<sup>2</sup> it is paramount to document how the LGBTQ+ community has fared  
14 during the initial stages of the coronavirus pandemic. The present study aims to address this  
15 need through analysing data from the Queerantime Study (a portmanteau Queer and  
16 Quarantine), a web-based survey that assesses how LGBTQ+ adults are experiencing the  
17 coronavirus pandemic. In the present paper, we examine extent to which respondents to the  
18 Queerantime survey experienced forms of sexuality or gender-based discrimination, including  
19 harassment and exclusion, during the coronavirus pandemic. We also examine how  
20 widespread experiences of perceived stress and depressive symptomology were among  
21 respondents to the Queerantime survey and examine to what extent instances of harassment  
22 and exclusion predict poorer mental health among LGBTQ+ respondents during the  
23 coronavirus pandemic.

24

## 1 **Methods**

2 Data collection was conducted via a cross-sectional, web-based anonymous survey. It began  
3 on 27<sup>th</sup> April 2020 and ended on 30<sup>th</sup> December 2020.. Twitter, Facebook and Instagram  
4 accounts were created for the study and were used to disseminate links to the survey in order  
5 to maximise the response rate. We contributed guest blogs and created a website in order to  
6 help publicise the study (<https://queerantinestudy.wixsite.com/queerantine>). The link to the  
7 survey was distributed through a number of LGBTQ+ organisations including through the  
8 newsletter of the LGBT Consortium, the largest network of LGBT+ groups, projects and  
9 organisations in the UK, as well as directly by local organisations such as the East London  
10 Out Project (ELOP). The target sample included respondents aged 18 and over, and who self-  
11 identify as lesbian, gay, bisexual, queer, as having another minority sexual orientation; or  
12 who were transgender or gender diverse in other ways including being non-binary or intersex.  
13 Cisgender respondents who self-identify as heterosexual were not excluded from the survey,  
14 although recruitment and survey design were tailored towards the LGBTQ+ community, and  
15 their responses were not included in the analyses presented here. The Queerantine survey  
16 asked respondents about their sociodemographic characteristics, their physical and mental  
17 health, health behaviours, and experiences and anxieties relating to the pandemic and their  
18 identity. Ethical approval was obtained from the ethics board of the University of Sussex  
19 (ER/LB516/4) and University College London (REC 1335).

## 21 **Patient and Public Involvement**

22 Expert input from a representative of a national LGBT umbrella organisation broadened the  
23 focus of the survey to consider how respondents had experienced changes in support from  
24 LGBTQ+ service providers and organisations; this input also helped to shape the measures  
25 around gender. Community organisations also helped in the dissemination of the study

1 through social media and inclusion of the study within newsletters. However, no further  
2 public involvement was sought in the design or analysis of the survey.

#### 4 **Outcome variables**

5 In this analysis we focus on three outcomes: depressive symptoms, perceived stress, and  
6 experiences of discrimination. We assessed depression with the 10-item Center for  
7 Epidemiological Studies Depression Scale (CES-D-10), which asks respondents to consider  
8 how much in the past week they have experienced feelings of loneliness, happiness, and fear.  
9 <sup>35</sup> The CES-D-10 includes three items on depressed affect, five items on somatic symptoms,  
10 and two on positive affect. <sup>36</sup> Scores range between 0 and 30 with good levels of internal  
11 consistency in our analytical sample (Cronbach's  $\alpha=0.87$ ). Thresholds were used to denote  
12 significant depressive symptoms' based on a score of ten or over <sup>35</sup>. In the present study we  
13 mainly examine the CES-D-10 as a binary measure, with supplementary analyses presenting  
14 data on CES-D-10 in continuous models.

15 We measured stress with the 4-item Perceived Stress Scale (PSS-4), which assesses the extent  
16 to which situations in life are viewed as stressful. <sup>37</sup> The scale asks respondents about  
17 respondents' perceived ability to control important things in life, confidence in handling  
18 personal problems, the extent to which they felt things were going their way, and whether  
19 difficulties were piling up so high they were becoming insurmountable, using the past month  
20 as a frame of reference. Scores range between 0 and 15, and have good levels of internal  
21 consistency in our analytical sample (Cronbach's  $\alpha=0.83$ ).

22  
23 We measured experiences of discrimination with a set of options that asked respondents  
24 whether, since the start of the coronavirus pandemic, they had experienced verbal  
25 harassment, physical harassment, sexual harassment, threats of violence, exclusion from

1 events/activities, involuntary disclosure of LGBTQ+ identity, or other forms of inappropriate  
2 treatment because they were LGBTQ+ or were perceived as being LGBTQ+. Individual  
3 measures were combined into one summary variable of ‘any discrimination.’

## 4 5 **Sexual orientation and gender**

6 Gender was assessed using the recommended two-step method <sup>38</sup> with two items: (1) the  
7 gender that participants felt best represented them (options included: Female (including trans  
8 woman); Male (including trans man); Non-binary; Other (free text category)), and (2)  
9 whether this gender was the same as assigned at birth (options included: Yes; No; Don’t  
10 Know). The two items were cross-tabulated to categorise participants as either transgender  
11 and gender diverse (TGGD) or cisgender. Sexual orientation was captured with a question  
12 that asked participants to select their sexual orientation from the following categories:  
13 Bisexual; Gay/Lesbian; Heterosexual/Straight; Don’t know; Prefer not to say; and an Other,  
14 free-text category. Using pre-defined response categories, respondents could only select one  
15 category, although those who identified with multiple categories (e.g. Queer and Bisexual or  
16 Male and Non-binary) could use the free-text option to state this, with respondents declaring  
17 more than one gender being categorised as transgender and gender diverse, and respondents  
18 selecting more than one sexual orientation categorised as having another non-heterosexual  
19 orientation.

20  
21 We present data on sexual orientation and gender as different constructs in supplementary  
22 analyses, although the main analyses use a variable that examines the intersection of sexual  
23 orientation and gender using five categories: (i) cisgender female lesbian/gay; (2) cisgender  
24 female with another non-heterosexual orientation (including bisexual, other, don’t know, and  
25 prefer not to say); (3) transgender and gender diverse; (4) cisgender male gay; (5) cisgender

1  
2  
3 1 male with another non-heterosexual orientation (including bisexual, other, don't know, and  
4  
5 2 prefer not to say).  
6  
7  
8 3

#### 10 4 **Covariates**

12 5 We adjusted for variables thought to confound the association between our exposure and  
13  
14 6 outcome variables. Socioeconomic status was measured through a variable that asked  
15  
16 7 respondents about their subjective social status (modelled on an approach used in general  
17  
18 8 population surveys <sup>39</sup>), and how this had changed since the start of the pandemic, with  
19  
20 9 categories reflecting no change, positive change, and negative change.  
21  
22  
23  
24 10

#### 26 11 **Analytical plan**

28 12 Data for the present analyses includes responses collected until 13 July 2020. The analysis  
29  
30 13 mainly consisted of a complete case analysis of respondents, although a dummy category of  
31  
32 14 no information (missing) for the harassment variable was created for models of mental health  
33  
34 15 in order to preserve sample size. Summary statistics were calculated for baseline  
35  
36 16 characteristics and associations between exposure variables and outcomes were tested in  
37  
38 17 unadjusted analyses using the  $\chi^2$  test of association and ANOVA as appropriate. The  
39  
40 18 modelling began with exploring selected predictors of discrimination before examining how  
41  
42 19 discrimination itself predicted poorer mental health. Binary logistic regression models were  
43  
44 20 constructed for harassment and high depressive symptomology; Ordinary Least Squares  
45  
46 21 (OLS) regression models were constructed for continuous models of perceived stress and  
47  
48 22 depressive symptoms. Results for both binary and continuous specifications of CES-D-10 are  
49  
50 23 discussed, with the results for the continuous specification included in supplementary  
51  
52 24 analyses, as a form of sensitivity analysis. For models where discrimination is the outcome of  
53  
54 25 interest we only adjusted for sexual orientation and gender, age, ethnicity, and location. For  
55  
56  
57  
58  
59  
60



1  
2  
3 1 models where depressive symptomology or perceived stress are the outcomes of interest, we  
4  
5 2 used the measure of discrimination as the main exposure variable, and adjusted for the same  
6  
7 3 covariates as above as well socioeconomic status and relationship status. A different set of  
8  
9 4 controls was used between models as the potential confounders were theorised to differ  
10  
11 5 slightly and due to the lower number of ‘events’ in the model of discrimination.  
12  
13 6 Additional analysis examining when in the pandemic harassment and discrimination occurred  
14  
15 7 is also included to contextualise the discussion. Adjusted and unadjusted models are  
16  
17 8 presented, and in line with suggested practice, estimates were evaluated based the exact p-  
18  
19 9 value, the magnitude of the coefficients and the width of the confidence intervals, rather than  
20  
21 10 on a single test statistic.<sup>40</sup> We conducted all analyses in Stata 14.<sup>41</sup> The decision on how to  
22  
23 11 present the findings across diverse identities is challenging, particularly as we combined  
24  
25 12 information on sexual orientation and gender in deriving categories. Our decisions reflected  
26  
27 13 considerations of the conceptual similarities/differences between groups, the numbers across  
28  
29 14 groups within our sample, as well as the decision to adopt an ‘inclusive’ or ‘specific’  
30  
31 15 approach<sup>42</sup> when analysing the data based on observed differences in key variables. Some  
32  
33 16 preliminary analysis (not shown) was undertaken to explore the validity of bringing different  
34  
35 17 groupings together before the decision was taken to use five main categories combining  
36  
37 18 sexual orientation and gender.  
38  
39  
40  
41  
42  
43  
44  
45  
46

## 20 **Results**

21 Between April 27<sup>th</sup> and July 13<sup>th</sup> we received a total of 426 responses. Of these 24 were  
22 excluded because they did not provide their age, and 4 were excluded because they were aged  
23 under 18. Of the remaining 398, we were able to calculate PSS-4 and CES-D-10 scores for  
24 325 and 324 respondents respectively. Once we had accounted for missingness on other

1 covariates, the analytical sample consisted of 310 respondents for models of mental health,  
2 excluding one further cisgender heterosexual respondent.

3  
4  
5  
6  
7  
8  
9  
10 *TABLE 1 HERE*  
11  
12  
13  
14

15 6 Participants identified their sexual orientation and gender in a number of different ways. The  
16  
17 7 largest group identified as cisgender gay males (30.0%); almost a quarter of the sample  
18  
19 8 (23.5%) were categorised as TGGD (of different sexual orientations); cisgender gay and  
20  
21 9 lesbian females comprised 22.9% of the respondents; while cisgender females with another  
22  
23  
24 10 non-heterosexual orientation accounted for 19.4% of respondents, and cisgender males with  
25  
26 11 another non-heterosexual orientation accounted for 4.2% of respondents. A further  
27  
28  
29 12 breakdown of respondents' identities is available in the supplementary file, with descriptive  
30  
31 13 information on key variables. Respondents aged 18-24 accounted for less than a fifth of the  
32  
33 14 sample (15.1%), while those aged 55+ accounted for less than a tenth of the sample (7.1%),  
34  
35 15 with a greater representation of respondents aged 25-54 years old.

36  
37  
38 16 Descriptively, the mean scores for PSS-4 suggested that the sample had high levels of  
39  
40 17 perceived stress (Mean (M): 7.67; Standard Deviation (SD): 3.22). Using the recommended  
41  
42 18 threshold of 10 or more to identify significant depressive symptomatology, we observed that  
43  
44 19 the majority of respondents fell into this category (71.9%). Cis-female respondents who  
45  
46 20 identify as gay or lesbian had the lowest scores for perceived stress or depressive symptoms  
47  
48  
49 21 (see Table 1); conversely transgender and gender diverse individuals had the highest scores  
50  
51 22 (83.6%).  
52  
53  
54 23

55  
56 24 One-in-six respondents reported some form of harassment since the start of the pandemic  
57  
58 25 because they were LGBTQ+ (16.7%); the most common forms being verbal harassment  
59  
60

1 including insults or other hurtful comments (8.7%), exclusion from events or activities  
2 (5.6%), and involuntary disclosure of LGBTQ+ identity (3.5%). Perceived stress was  
3 markedly higher for those who had experienced discrimination (PSS-4 M: 9.44 SD: 2.99)  
4 compared to those who had not (PSS-4 M: 7.35 SD: 3.16). Respondents who had experienced  
5 discrimination also had higher depressive symptomology scores (CES-D-10 M: 17.87 SD:  
6 6.21) compared to those who had not (CES-D-10 M: 13.43 SD: 6.97).  
7

8 *TABLE 2 HERE*  
9

10 We examined the relationship between gender and sexual orientation and discrimination in  
11 logistic regression models (see Table 2). Based on the association observed in Table 1, we  
12 used TGGD as the reference category and explored whether the higher risk of TGGD people  
13 to experience discrimination remained after controlling for basic sociodemographic  
14 covariates. The results from adjusted models showed that the odds of experiencing  
15 discrimination were lower for all other groups, and significantly lower in the case of  
16 cisgender gay males (OR: 0.237, 95% Confidence Interval (CI):0.091-0.617) and cisgender  
17 females who identified with a sexual minority orientation other than gay/lesbian (OR: 0.361,  
18 CI: 0.141-0.921). Within the sample, the results were suggestive of a u-shaped trend in terms  
19 of age, with the youngest and the oldest LGBTQ+ respondents in the sample being at greatest  
20 risk of experiencing discrimination, although differences by age were generally not  
21 statistically significant.  
22

23 Experiences of discrimination were clear predictors of poorer mental health. The average  
24 score for perceived stress increased by 1.44 points (CI: 0.517-2.354) for those who had  
25 experienced discrimination, compared to those who had not. Similarly, the odds of exhibiting

1 significant depressive symptomology (CES-D-10 scores of 10 or more) increased three-fold  
2 among those who had experienced discrimination based on their gender or sexuality  
3 compared to those who had not (OR: 3.251; 95% CI: 1.168-9.052). These marked  
4 associations remained after adjusting for potential confounders (see Models 1 to 4 in Table  
5 3).

6  
7 *TABLE 3 HERE*

8  
9 Cisgender female lesbian or gay respondents had lower perceived stress levels than other  
10 LGBTQ+ groups. TGGD respondents and non-heterosexual cisgender males who didn't  
11 identify as gay had among the highest average perceived stress scores in adjusted models.  
12 Although similar trends were observed in the odds of experiencing depressive  
13 symptomatology, the evidence was ultimately inconclusive for these groups, although  
14 cisgender females with another non-heterosexual orientation besides lesbian or gay had a  
15 higher risk of significant depressive symptoms relative lesbian/gay cisgender women. Further  
16 sensitivity analysis of the CES-D-10 as a continuous measure (see supplementary file) shows  
17 that TGGD people had substantially higher CES-D-10 scores than cisgender lesbian or gay  
18 females, with an average score 3.38 points (95% CI: 1.172-5.595) higher after adjusting for  
19 other covariates. A clear trend by age was observed in models 3 and 4 (see Table 3), with  
20 younger respondents having significantly poorer mental health than older individuals, both  
21 for perceived stress and significant depressive symptomology, after adjusting for other  
22 covariates.

## 23 24 **Discussion** 25

1  
2  
3 1 In this study we present data on the levels of depressive symptoms, perceived stress, and  
4  
5 2 experiences of discrimination of LGBTQ+ people during the COVID-19 pandemic collected  
6  
7 3 through a web-based survey. Respondent characteristics broadly mirrored the  
8  
9 4 sociodemographic characteristics of the recent UK government National LGBT Survey.<sup>43</sup>  
10  
11 5 The distribution of respondents by sexual orientation was very similar, albeit with a higher  
12  
13 6 share of respondents who identified as Queer in the Queerantime survey (8% vs  
14  
15 7 approximately 1%). The proportion of respondents aged 18-24 was lower at 15.1%  
16  
17 8 (compared with approximately 37.4%), with higher proportions at older age groups in line  
18  
19 9 with the UK population as a whole. The Queerantime survey had a larger proportion of  
20  
21 10 participants who were TGGD than the UK National LGBT Survey (23.5% vs 15%).<sup>43</sup>  
22  
23 11  
24  
25 12 We find that scores for perceived stress and depressive symptoms among our LGBTQ+  
26  
27 13 sample are high, and higher than observed in community samples and vulnerable populations  
28  
29 14 in the recent past (for example<sup>44 45</sup>). Furthermore, we find that the pandemic may not be  
30  
31 15 impacting the LGBTQ+ community evenly, with TGGD individuals having particularly high  
32  
33 16 scores for perceived stress and depressive symptoms relative to cisgender gay and lesbian  
34  
35 17 individuals. Non-heterosexual respondents who are cisgender but do not identify as lesbian or  
36  
37 18 gay also had elevated scores for perceived stress and depressive symptoms. Similarly, there  
38  
39 19 was a clear age gradient with younger LGBTQ+ people having much higher risks of showing  
40  
41 20 symptoms of stress and depression. This is in line with findings elsewhere that suggest  
42  
43 21 younger people were at elevated risk of experiencing stress, anxiety and depression during  
44  
45 22 the pandemic.<sup>46</sup> An important caveat to these results is that because of our cross-sectional  
46  
47 23 design, we are unable to definitively state that mental health status *deteriorated* as a result of  
48  
49 24 the pandemic and whether any deterioration in mental health was concentrated among TGGD  
50  
51 25 respondents or younger respondents; our study design also means we are unable to make  
52  
53  
54  
55  
56  
57  
58  
59  
60

1 direct comparisons to ascertain whether LGBTQ+ people are faring worse during the  
2 pandemic than heterosexual cisgender people. However, the underlying pathways through  
3 which LGBTQ+ people may have experienced greater and specific challenges during the  
4 pandemic and lockdown are becoming evident,<sup>22 26-30</sup> providing a basis for an assumption  
5 that LGBTQ+ people may have experienced greater stressors, with TGGD people facing  
6 particular sets of stressors, albeit on a theoretical basis and in need of further exploration and  
7 verification. Furthermore the very high levels of mental health issues uncovered here make it  
8 challenging to simply attribute such stark levels of mental health issues as the status quo pre-  
9 pandemic, although this assumption again needs further exploration and verification using a  
10 different study design. Regardless, the data definitively show that the pandemic has had a  
11 pernicious effect on the mental health of the LGBTQ+ community.

12  
13 Our analyses of discrimination reinforce the rationale for undertaking analyses of LGBTQ+  
14 health and mental health, with LGBTQ+ people theorised at greater risk of health  
15 complications due to a unique set of internal and external homophobic, heteronormative, and  
16 transphobic stressors.<sup>47</sup> We found that almost one-in-six respondents reported experiencing  
17 some form of discrimination during the pandemic, with TGGD respondents again at  
18 heightened risk of experiencing discrimination relative to other LGBTQ+ groups. Our results  
19 show that experiencing discrimination was a risk factor for higher perceived stress and  
20 depressive symptomology; the odds of reporting depressive symptomatology among  
21 individuals who had experienced discrimination were three times higher than among  
22 individuals who had not experienced any discrimination. Open ended responses to the survey  
23 described various experiences of discrimination and inappropriate incidents including  
24 increased or excessive scrutiny, misgendering, exclusion, and online abuse.

25

1  
2  
3 1 To further understand the results, we explored how mental health and discrimination varied  
4  
5 2 over the course of the survey. We observed that mental health scores in the sample were  
6  
7 3 poorer during the period April 27<sup>th</sup>-May 10<sup>th</sup> (the moment of ‘maximum risk’ as defined by  
8  
9 4 the UK Prime Minister) and during the period between May 23<sup>rd</sup>-June 14<sup>th</sup> (coinciding with  
10  
11 5 revelations of lockdown breaches by government officials in the UK, transphobic comments  
12  
13 6 on social media made by high profile figures, and protests surrounding the murder of George  
14  
15 7 Floyd), although these differences were not significant. Similarly, we observed non-  
16  
17 8 statistically significant differences in the proportion of respondents reporting instances of  
18  
19 9 discrimination, with the initial easing of the lockdown and particularly the period from June  
20  
21 10 15<sup>th</sup> onwards coinciding with increases in discrimination (see Figure 1), albeit based on a  
22  
23 11 small sample in the latter period. These trends help contextualise the results and illuminate  
24  
25 12 the hostile environments which LGBTQ+ people, and particularly TGGD respondents, were  
26  
27 13 experiencing.  
28  
29  
30  
31  
32  
33  
34

35 15 *FIGURE 1 HERE*  
36  
37  
38

### 39 17 **Limitations**

40  
41 18 Due to relatively small sample sizes, we have not been able to fully examine the diversity of  
42  
43 19 the LGBTQ+ community, and fully examine how experiences vary according to social  
44  
45 20 locations such as ethnicity, age, and gender. Studies in the US show that the highest levels of  
46  
47 21 violence are reported among transgender women of colour, and among young and low-  
48  
49 22 income transgender people,<sup>31 32</sup> suggesting that violence on the basis of transgender identity  
50  
51 23 or expression often affects the most marginalised subpopulations. Although we have adjusted  
52  
53 24 for these factors in our models, we have not been able to further disaggregate across social  
54  
55 25 locations to examine the role of interlocking systems of oppression in patterning experiences  
56  
57 26 of discrimination and adverse mental health.  
58  
59  
60

1  
2  
3 1  
4  
5 2 While our data collection efforts are limited by the inherent challenge of surveying a small,  
6  
7 3 dispersed, diverse, and difficult to reach population, it is nonetheless critically important to  
8  
9 4 study the lives and experiences of discrimination and mental health among LGBTQ+  
10  
11 5 communities because of the stark health and social inequalities they experienced before the  
12  
13 6 pandemic. Our choice of mental health measures reflected the need to field short scales  
14  
15 7 within a web-based survey where there was no incentive provided for respondents to  
16  
17 8 complete the questions. However, other more comprehensive or alternative measures of  
18  
19 9 mental health, and particularly mental wellbeing, may have yielded further nuance to the  
20  
21 10 results presented here.  
22  
23  
24  
25  
26  
27  
28  
29  
30  
31  
32  
33  
34  
35  
36  
37  
38  
39  
40  
41  
42  
43  
44  
45  
46  
47  
48  
49  
50  
51  
52  
53  
54  
55  
56  
57  
58  
59  
60

11  
12 New purposeful data collection was deemed appropriate as although a number of large  
13  
14 representative studies (e.g. the UK Household Longitudinal Study) are currently collecting  
15  
16 data on COVID-19 experiences, they typically contain small numbers of LGBTQ+ people,<sup>8</sup>  
17  
18 <sup>12</sup> often do not collect information on TGGD identities, and contain heteronormative  
19  
20 measures that can be exclusionary to LGBTQ+ respondents. An online convenience sample  
21  
22 was deemed appropriate due to the absence of robust data on LGBTQ+ people from large  
23  
24 surveys that could help to determine the characteristics of a representative sample of  
25  
26 LGBTQ+ people, as well as the risks inherent with any form of physical data collection  
27  
28 during the pandemic. An online approach was particularly suitable for those respondents who  
29  
30 may have been sheltering or shielding in households where their LGBTQ+ status was  
31  
32 unknown to other members of the household. Furthermore, this approach is in line with other  
33  
34 recent large scale efforts at understanding the health of LGBT people in the UK.<sup>43</sup> We do,  
35  
36 nevertheless, acknowledge that an online convenience sample can introduce potential issues  
37  
38 around sample selection, such as the omission of those without internet access, and the  
39  
40  
41  
42  
43  
44  
45  
46  
47  
48  
49  
50  
51  
52  
53  
54  
55  
56  
57  
58  
59  
60



1 possibility that those living in stressful situations or with depressive symptoms were more  
2 likely to self-select into the survey. Although rudimentary checks for data patterns that could  
3 indicate that ‘bots’ completed the survey were implemented, focussed on identifying cases  
4 where the same response had been provided to all Likert scale type questions, or where the  
5 middle response had been consistently provided, there remains a possibility that some  
6 responses may be based on false or duplicate records. Further measures that could have been  
7 implemented, such as password protection or identity checking, were not congruent with a  
8 format that allowed respondents to complete the survey anonymously, or believe that they  
9 were doing so.

10

11 As the inferential analysis consisted of three regression models where we show the  
12 development of the model by including additional regressors, we did not implement  
13 additional correction for multiple hypotheses (e.g. Bonferroni). We do note that, given a  
14 scenario where 20 hypotheses were being tested at a 5% level, we would expect to see at least  
15 one such deviation where we would interpret a result as being ‘statistically significant’  
16 inappropriately <sup>48</sup>; however, as discussed earlier, we also took a broader approach to  
17 evaluating estimates than interpreting p-values as being “significant” or “nonsignificant”. <sup>40</sup>

18

### 19 **Public Health Implications**

20 Results from the Queerantime Study suggest that groups within LGBTQ+ acronym may be at  
21 differential risk of experiencing stress or depressive symptomology, although the sample as a  
22 whole may also be at higher risk than the general population of stress and depressive  
23 symptomology due to minority stress. Homophobic and transphobic harassment and  
24 exclusion experienced during the pandemic has a deleterious impact on LGBTQ+ mental  
25 health, demonstrated by the strong and consistent associations between harassment and

1 poorer mental health in the models. Open-ended responses to survey questions emphasise the  
2 importance of LGBTQ+ social networks, often facilitated by the work of LGBTQ+  
3 organisations, in supporting LGBTQ+ individuals. However, these are the very organisations  
4 that are facing financial challenges with many on the brink of closure.<sup>49</sup>

5  
6 Globally, LGBT+ rights organisations have alerted policy-makers about the need to address  
7 the vulnerability of the LGBTQ+ community to the coronavirus pandemic, including  
8 collecting sexual orientation and gender data for COVID-19 cases, increased socioeconomic  
9 support for disadvantaged individuals, and support for organisations working with the  
10 community.<sup>50</sup> Our findings provide support to these demands given the documented high  
11 prevalence of depressive symptomology and stress, and the concerning reports of experiences  
12 of discrimination. Poor LGBTQ+ mental health may remain unchecked without substantial  
13 commitment and funding directed to ameliorating health inequalities exacerbated by the  
14 pandemic.

## 16 **Contributors**

17 DK and LB are equal contributors to this study. Both designed the Queerantime survey,  
18 developed the research focus, analysed the data, and drafted and edited the manuscript. DK  
19 and LB are the guarantors for this study and gave full approval of this version to be  
20 published.

## 22 **Data sharing statement**

23 No additional data are available.

## 25 **Competing interests**

1  
2  
3 1 None to declare. Due to the nature of this research, participants of this study did not agree for  
4  
5 2 their data to be shared publicly, so supporting individual level data is not available.  
6  
7  
8 3  
9

#### 10 4 **Funding**

11  
12 5 This research received no specific grant from any funding agency in the public, commercial  
13  
14 6 or not-for-profit sectors.  
15  
16  
17 7

#### 18 8 **Ethical approval**

19  
20 9 Ethical approval was obtained from the ethics board of the University of Sussex  
21  
22 10 (ER/LB516/4) and University College London (REC 1335).  
23  
24  
25  
26 11

#### 27 12 **Acknowledgments**

28  
29 13 We would like to thank the participants of the #Queerantime Study for sharing their  
30  
31 14 experiences with us. We would also like to thank Harri Weeks and the National LGB&T  
32  
33 15 Partnership for their advice and to all those who have helped to promote the study through  
34  
35 16 social media and in other ways. We would also like to thank Joanna Boyce for contributing  
36  
37 17 social media expertise that helped to boost the response rate. We would like to thank the peer  
38  
39 18 reviewers of this article for their comments and suggestions on an earlier draft.  
40  
41  
42  
43  
44 19  
45  
46  
47 20  
48  
49 21  
50 22  
51 23  
52 24  
53 25  
54 26  
55 27  
56 28  
57 29  
58  
59  
60

Figure 1 Proportion of respondents reporting discrimination by period in the pandemic

## References

1. Bowleg L. We're not all in this together: on COVID-19, intersectionality, and structural inequality. *American Journal of Public Health* 2020;110(no. 7 (July 1, 2020)):917-17.
2. Marmot M, Allen J. COVID-19: exposing and amplifying inequalities. *J Epidemiol Community Health* 2020;74(9):681-82.
3. Zeeman L, Sherriff N, Browne K, et al. A review of lesbian, gay, bisexual, trans and intersex (LGBTI) health and healthcare inequalities. *European journal of public health* 2019;29(5):974–80.
4. Conron K, Mimiaga M, Landers S. A population-based study of sexual orientation identity and gender differences in adult health. *American Journal of Public Health* 2010;100(10):1953-60.
5. Hudson-Sharp N, Metcalf H. Inequality among lesbian, gay bisexual and transgender groups in the UK: a review of evidence. London: National Institute of Economic and Social Research, 2016.
6. Reisner SL, Poteat T, J. K, et al. Global health burden and needs of transgender populations: a review. *The Lancet* 2016;388(10042):412-36.
7. Shahab L, Brown J, Hagger-Johnson G, et al. Sexual orientation identity and tobacco and hazardous alcohol use: findings from a cross-sectional English population survey. *BMJ Open* 2017;7:e015058.
8. Bécares L. Health and socio-economic inequalities by sexual orientation among older women in the United Kingdom: Findings from the UK Household Longitudinal Study. *Ageing and Society* 2020;1-19. doi: doi:10.1017/S0144686X20000367
9. Semlyen J, Curtis T, Varney J. Sexual orientation identity in relation to unhealthy Body Mass Index (BMI): Individual Participant Meta-Analysis of 93,429 individuals from 12 UK health surveys. *Journal of Public Health* 2019;fdy224
10. Herbst J, Jacobs E, Finlayson T, et al. Estimating HIV prevalence and risk behaviors of transgender persons in the United States: A systematic review. *AIDS and Behavior* 2008;12:1-17.
11. Fredriksen-Goldsen K, Kim H, Bryan A, et al. The cascading effects of marginalization and pathways of resilience in attaining good health among LGBT older adults. *The Gerontologist* 2017;57(suppl\_1): S72-S83.
12. Kneale D, Thomas J, French R. Inequalities in health and care among Lesbian, Gay and Bisexual people aged 50 and over in the United Kingdom: A systematic review and meta-analysis of sources of individual participant data. *The Journals of Gerontology: Series B* 2020:gbaa071. doi: doi.org/10.1093/geronb/gbaa071
13. Russell ST, Fish JN. Mental health in lesbian, gay, bisexual, and transgender (LGBT) youth. *Annual review of clinical psychology* 2016;12:465-87.
14. Schauer GL, Berg CJ, Bryant LO. Sex differences in psychosocial correlates of concurrent substance use among heterosexual, homosexual and bisexual college students. *The American journal of drug and alcohol abuse* 2013;39(4):252-58.

15. Mereish EH, Sheskier M, Hawthorne DJ, et al. Sexual orientation disparities in mental health and substance use among Black American young people in the USA: effects of cyber and bias-based victimisation. *Culture, health & sexuality* 2019;21(9):985-98.
16. Jia R, Ayling K, Chalder T, et al. Mental health in the UK during the COVID-19 pandemic: early observations. *MedRxiv* 2020 doi: <https://doi.org/10.1101/2020.05.14.20102012>
17. Malik AO, Peri-Okonny P, Gosch K, et al. Association of perceived stress with health status outcomes in patients with peripheral artery disease. *Journal of psychosomatic research* 2021;140:110313.
18. Rosenberg M, Luetke M, Hensel D, et al. Depression and loneliness during April 2020 COVID-19 restrictions in the United States, and their associations with frequency of social and sexual connections. *Soc Psychiatry Psychiatr Epidemiol* 2021:1-12.
19. Davidson M. Seeking refuge under the umbrella: Inclusion, exclusion, and organizing within the category transgender. . *Sexuality Research & Social Policy* 2007;4(4):60-80.
20. Meyer IH, Brown TN, Herman JL, et al. Demographic Characteristics and Health Status of Transgender Adults in Select US Regions: Behavioral Risk Factor Surveillance System, 2014. *American Journal of Public Health* 2016;107(4):582-89.
21. Marmet S, Wicki M, Gmel G, et al. Sexual minority orientation is associated with greater psychological impact due to the COVID-19 crisis—evidence from a longitudinal cohort study of young Swiss men. *PsyArXiv January* 2021;15
22. Linnemayr S, Barreras JL, Izenberg M, et al. Longitudinal Assessment of Changes in Mental and Sexual Health Outcomes Due to COVID-19 Among Latinx SMM and TGW. *JAIDS Journal of Acquired Immune Deficiency Syndromes* 2020;85(5):e90-e92.
23. Rodriguez-Seijas C, Fields EC, Bottary R, et al. Comparing the impact of CoViD-19-related social distancing on mood and psychiatric indicators in sexual and gender minority (SGM) and non-SGM individuals. *Frontiers in psychiatry* 2020;11
24. Hendricks M, Testa R. A conceptual framework for clinical work with transgender and gender nonconforming clients: An adaptation of the Minority Stress Model. *Professional Psychology: Research and Practice* 2012;43(5):460-67.
25. Meyer IH. Prejudice, social stress, and mental health in lesbian, gay, and bisexual populations: conceptual issues and research evidence. *Psychological bulletin* 2003;129(5):674-97.
26. Gonzales G, de Mola EL, Gavulic KA, et al. Mental health needs among lesbian, gay, bisexual, and transgender college students during the COVID-19 pandemic. *Journal of Adolescent Health* 2020;67(5):645-48.
27. Gato J, Barrientos J, Tasker F, et al. Psychosocial effects of the COVID-19 pandemic and mental health among LGBTQ+ young adults: a cross-cultural comparison across six nations. *Journal of Homosexuality* 2021;68(4):612-30.
28. Thomas B. Only Connect – The Impact of Covid-19 on Older LGBT+ People. London: Opening Doors London, 2020.
29. Jarrett B, Peitzmeier SM, Restar A, et al. Gender-affirming care, mental health, and economic stability in the time of COVID-19: a global cross-sectional study of transgender and non-binary people. *medRxiv* 2020 doi: <https://doi.org/10.1101/2020.11.02.20224709>
30. Koehler A, Motmans J, Alvarez LM, et al. How the COVID-19 pandemic affects transgender health care in upper-middle-income and high-income countries—A worldwide, cross-sectional survey. 2020
31. Bradford J, Reisner SL, Honnold JA, et al. Experiences of transgender-related discrimination and implications for health: results from the Virginia Transgender Health Initiative Study. *American Journal of Public Health* 2013;103(10):1820-29.
32. White Hughto JM, Reisner SL, Pachankis JE. Transgender stigma and health: A critical review of stigma determinants, mechanisms, and interventions. *Social Science and Medicine* 2015;147:222-31.

- 1  
2  
3 1 33. Gahan L, Almack K. Experiences of and responses to disempowerment, violence, and injustice  
4 2 within the relational lives of lesbian, gay, bisexual, transgender, and queer people. *Journal of*  
5 3 *Sociology* 2020  
6 4  
7 4 34. Tudor A. *Terfism is White Distraction: On BLM, Decolonising the Curriculum, Anti-Gender Attacks*  
8 5 *and Feminist Transphobia*. Engenderings. London: LSE, 2020.  
9 6 35. Andresen EM, Malmgren JA, Carter WB, et al. Screening for depression in well older adults:  
10 7 Evaluation of a short form of the CES-D. *American journal of preventive medicine*  
11 8 1994;10(2):77-84.  
12 9 36. Baron EC, Davies T, Lund C. Validation of the 10-item centre for epidemiological studies  
13 10 depression scale (CES-D-10) in Zulu, Xhosa and Afrikaans populations in South Africa. *BMC*  
14 11 *psychiatry* 2017;17(1):6.  
15 12 37. Cohen S, Kamarck T, Mermelstein R. A global measure of perceived stress. *Journal of health and*  
16 13 *social behavior* 1983:385-96.  
17 14 38. The GenIUSS Group. *Best Practices for Asking Questions to Identify Transgender and Other*  
18 15 *Gender Minority Respondents on Population-Based Surveys*. Los Angeles, CA: The Williams  
19 16 Institute, 2014.  
20 16 39. Singh-Manoux A, Adler NE, Marmot MG. Subjective social status: its determinants and its  
21 17 association with measures of ill-health in the Whitehall II study. *Social science & medicine*  
22 18 2003;56(6):1321-33.  
23 19 40. Greenland S, Senn SJ, Rothman KJ, et al. Statistical tests, P values, confidence intervals, and  
24 20 power: a guide to misinterpretations. *Eur J Epidemiol* 2016;31(4):337-50.  
25 21 41. Stata Statistical Software: Release 14 [program]. College Station, TX: StataCorp LP, 2015.  
26 22 42. Restar A, Jin H, Operario D. Gender-inclusive and gender-specific approaches in trans health  
27 23 research. *Transgender Health* 2020  
28 24 43. Government Equalities Office. *National LGBT survey*. Manchester: Government Equalities Office  
29 25 2018.  
30 26 44. Warttig SL, Forshaw MJ, South J, et al. New, normative, English-sample data for the short form  
31 27 perceived stress scale (PSS-4). *Journal of health psychology* 2013;18(12):1617-28.  
32 28 45. Zhang W, O'Brien N, Forrest JI, et al. Validating a shortened depression scale (10 item CES-D)  
33 29 among HIV-positive people in British Columbia, Canada. *PloS one* 2012;7(7):e40793.  
34 30 46. Varma P, Junge M, Meaklim H, et al. Younger people are more vulnerable to stress, anxiety and  
35 31 depression during COVID-19 pandemic: A global cross-sectional survey. *Progress in Neuro-*  
36 32 *Psychopharmacology and Biological Psychiatry* 2021;109:110236.  
37 33 47. Frost DM, Lehavot K, Meyer IH. Minority stress and physical health among sexual minority  
38 34 individuals. *Journal of behavioral medicine* 2015;38(1):1-8. doi: 10.1007/s10865-013-9523-8  
39 35 48. Gelman A, Hill J, Yajima M. Why we (usually) don't have to worry about multiple comparisons.  
40 36 *Journal of Research on Educational Effectiveness* 2012;5(2):189-211.  
41 37 49. LGBT Consortium. *The impact of COVID-19 on LGBT+ service delivery*. London: LGBT Consortium,  
42 38 2020.  
43 39 50. National LGBT Cancer Network. *Open Letter about Coronavirus and the LGBTQ+ Communities*.  
44 40 *Over 100 Organizations Ask Media & Health Officials to Weigh Added Risk*. In: Network  
45 41 TNLC, ed. New York, NY, 2020.  
46 42  
47 43  
48 44  
49 45  
50 46  
51 47  
52  
53  
54  
55  
56  
57  
58  
59  
60

## Tables and Figures

**Table 1: Mental health, experiences of discrimination, and sociodemographic characteristics of the Queerantime Study respondents**

|                                                                         | Cis female<br>Gay/Lesbian | Cis female<br>of another<br>non-<br>heterosexua<br>l<br>orientation | Trans-<br>gender<br>and<br>Gender<br>Diverse<br>(TGGD) | Cis male<br>Gay | Cis male of<br>another<br>non-<br>heterosexua<br>l<br>orientation | Total             |
|-------------------------------------------------------------------------|---------------------------|---------------------------------------------------------------------|--------------------------------------------------------|-----------------|-------------------------------------------------------------------|-------------------|
|                                                                         | %                         | %                                                                   | %                                                      | %               | %                                                                 | %                 |
| <b>Mental health outcomes</b>                                           |                           |                                                                     |                                                        |                 |                                                                   |                   |
| PSS-4 Score,<br>M(SD)                                                   | 6.44<br>(3.18)            | 8.33<br>(3.14)                                                      | 8.96<br>(2.99)                                         | 7.03<br>(2.97)  | 9.00<br>(3.37)                                                    | 7.672<br>(3.218)  |
| CES-D-10 Score,<br>M(SD)                                                | 12.0<br>(6.65)            | 15.0<br>(5.86)                                                      | 17.15<br>(6.6)                                         | 12.75<br>(7.17) | 16.15<br>(7.5)                                                    | 14.174<br>(6.948) |
| <b>Evidence of significant<br/>depressive<br/>Symptomology</b>          |                           |                                                                     |                                                        |                 |                                                                   |                   |
| No evidence (<10)                                                       | 36.62                     | 18.33                                                               | 16.44                                                  | 38.71           | 15.38                                                             | 28.06             |
| Evidence of significant<br>depressive<br>symptomology (≥10)             | 63.38                     | 81.67                                                               | 83.56                                                  | 61.29           | 84.62                                                             | 71.94             |
| <b>Any LGBTQ+ related<br/>harassment or<br/>inappropriate incidents</b> |                           |                                                                     |                                                        |                 |                                                                   |                   |
| None reported                                                           | 74.65                     | 81.67                                                               | 64.38                                                  | 87.10           | 84.62                                                             | 77.81             |
| Harassment reported <sup>s</sup>                                        | 19.72                     | 13.33                                                               | 28.77                                                  | 7.53            | 15.38                                                             | 16.72             |
| No information (missing)                                                | 5.63                      | 5.00                                                                | 6.85                                                   | 5.38            | 0                                                                 | 5.47              |
| <b>Age Group</b>                                                        |                           |                                                                     |                                                        |                 |                                                                   |                   |
| 18-24                                                                   | 9.86                      | 18.33                                                               | 31.51                                                  | 2.15            | 30.77                                                             | 15.11             |
| 25-34                                                                   | 18.31                     | 45.00                                                               | 31.51                                                  | 32.26           | 23.08                                                             | 30.87             |
| 35-44                                                                   | 39.44                     | 23.33                                                               | 16.44                                                  | 31.18           | 23.08                                                             | 27.65             |
| 45-54                                                                   | 23.94                     | 10.00                                                               | 16.44                                                  | 23.66           | 15.38                                                             | 19.29             |
| 55+                                                                     | 8.45                      | 3.33                                                                | 4.11                                                   | 10.75           | 7.69                                                              | 7.07              |
| <b>Identify as ethnic<br/>minority</b>                                  |                           |                                                                     |                                                        |                 |                                                                   |                   |

|                                                     |               |               |               |               |               |               |
|-----------------------------------------------------|---------------|---------------|---------------|---------------|---------------|---------------|
| Not an ethnic minority                              | 87.32         | 81.67         | 90.41         | 83.87         | 76.92         | 85.53         |
| Ethnic minority                                     | 12.68         | 16.67         | 9.59          | 12.90         | 23.08         | 13.18         |
| Prefer Not to Say                                   | 0             | 1.67          | 0             | 3.23          | 0             | 1.29          |
| <b>Location</b>                                     |               |               |               |               |               |               |
| UK                                                  | 81.69         | 80.00         | 82.19         | 90.32         | 76.92         | 83.60         |
| Rest of the world                                   | 18.31         | 20.00         | 17.81         | 9.68          | 23.08         | 16.40         |
| <b>Change in perceived social status</b>            |               |               |               |               |               |               |
| Negative change in status                           | 25.35         | 26.67         | 36.99         | 23.66         | 23.08         | 27.65         |
| No change                                           | 52.11         | 43.33         | 35.62         | 51.61         | 61.54         | 46.95         |
| Positive change                                     | 22.54         | 30.00         | 27.40         | 24.73         | 15.38         | 25.40         |
| Total                                               |               |               |               |               |               | 100.00        |
| <b>Relationship status</b>                          |               |               |               |               |               |               |
| Single                                              | 21.13         | 25.00         | 42.47         | 19.35         | 23.08         | 26.37         |
| Dating or in a relationship but not living together | 21.13         | 30.00         | 19.18         | 26.88         | 46.15         | 25.08         |
| Cohabiting/Married/Civil Partnership                | 56.34         | 45.00         | 34.25         | 49.46         | 30.77         | 45.98         |
| Divorced, Widowed or Prefer Not to Say              | 1.41          | 0             | 4.11          | 4.30          | 0             | 2.57          |
| <b>Total (%)</b>                                    | <b>100.00</b> | <b>100.00</b> | <b>100.00</b> | <b>100.00</b> | <b>100.00</b> | <b>100.00</b> |
| <b>Total (N)</b>                                    | <b>71</b>     | <b>60</b>     | <b>73</b>     | <b>93</b>     | <b>13</b>     | <b>310</b>    |

Notes: M = Mean; SD = Standard Deviation; <sup>s</sup> see methods for types of incidents

**Table 2: Logistic regression results for unadjusted and adjusted associations between gender identity/sexual orientation and discrimination during COVID-19 pandemic (Odds ratios and confidence intervals in brackets)**

|                                                                               | Experiences of discrimination |                             |
|-------------------------------------------------------------------------------|-------------------------------|-----------------------------|
|                                                                               | Unadjusted                    | Adjusted                    |
|                                                                               | O.R. (CI)                     | O.R. (CI)                   |
| <b>Gender ID and Sex Orientation baseline: Transgender and gender diverse</b> |                               |                             |
| Cis female Gay/Lesbian                                                        | 0.576<br>(0.265 - 1.252)      | 0.743<br>(0.320 - 1.727)    |
| Cis female of another non-heterosexual orientation                            | 0.364**<br>(0.147 - 0.897)    | 0.361**<br>(0.141 - 0.921)  |
| Cis male gay                                                                  | 0.218***<br>(0.090 - 0.529)   | 0.237***<br>(0.091 - 0.617) |
| Cis male of another non-heterosexual orientation                              | 0.364<br>(0.075 - 1.765)      | 0.334<br>(0.066 - 1.704)    |
| <b>Age group baseline: 18-24 years</b>                                        |                               |                             |
| 25-34 years                                                                   |                               | 0.981<br>(0.411 - 2.347)    |
| 35-44 years                                                                   |                               | 0.302**                     |



|                                                           |     |                 |
|-----------------------------------------------------------|-----|-----------------|
|                                                           |     | (0.102 - 0.896) |
| 45-54 years                                               |     | 0.409           |
|                                                           |     | (0.139 - 1.205) |
| 55+ years                                                 |     | 1.567           |
|                                                           |     | (0.474 - 5.188) |
| <b>Ethnic minority (baseline: not an ethnic minority)</b> |     | 1.345           |
|                                                           |     | (0.520 - 3.484) |
| <b>Location: Rest of the world (baseline: UK)</b>         |     | 0.530           |
|                                                           |     | (0.204 - 1.375) |
| Observations                                              | 295 | 295             |

\*\*\* p<0.01, \*\* p<0.05, \* p<0.1; O.R: Odds Ratio; CI: Confidence Interval

**Table 3: Results of unadjusted and adjusted OLS Regression for PSS-4 score (Models 1 and 2; regression coefficients and confidence intervals in brackets) and unadjusted and adjusted logistic regression results for odds of significant depressive symptomology indicated by CES-D-10 scores  $\geq 10$  (Models 3 and 4; odds ratios and confidence intervals in brackets)**

|                                                                       | PSS-4 score                 |                             | CES-D-10 scores $\geq 10$   |                            |
|-----------------------------------------------------------------------|-----------------------------|-----------------------------|-----------------------------|----------------------------|
|                                                                       | Unadjusted<br>B(CI)         | Adjusted<br>B(CI)           | Unadjusted<br>O.R. (CI)     | Adjusted<br>O.R. (CI)      |
| Any harassment or inappropriate incidents<br>baseline: None           |                             |                             |                             |                            |
| Form of harassment reported                                           | 1.882***<br>(0.957 - 2.807) | 1.436***<br>(0.517 - 2.354) | 4.228***<br>(1.582 - 11.30) | 3.252**<br>(1.168 - 9.052) |
| No information                                                        | -0.378<br>(-1.863 - 1.108)  | -0.756<br>(-2.198 - 0.686)  | 2.325<br>(0.634 - 8.520)    | 1.796<br>(0.456 - 7.074)   |
| <b>Gender ID and Sex Orientation baseline: Cis female Gay/Lesbian</b> |                             |                             |                             |                            |
| Cis female of another non-heterosexual orientation                    | 2.014***<br>(0.977 - 3.052) | 1.367***<br>(0.345 - 2.389) | 2.881**<br>(1.257 - 6.604)  | 2.154*<br>(0.890 - 5.210)  |
| Transgender and gender diverse                                        | 2.357***<br>(1.369 - 3.345) | 1.561***<br>(0.570 - 2.552) | 2.748**<br>(1.231 - 6.134)  | 1.904<br>(0.791 - 4.580)   |
| Cis male gay                                                          | 0.824*<br>(-0.113 - 1.761)  | 0.769*<br>(-0.145 - 1.683)  | 1.061<br>(0.550 - 2.046)    | 0.986<br>(0.487 - 1.998)   |
| Cis male of another non-heterosexual orientation                      | 2.624***<br>(0.840 - 4.407) | 1.982**<br>(0.255 - 3.709)  | 3.626<br>(0.732 - 17.97)    | 2.553<br>(0.481 - 13.56)   |
| <b>Age group baseline: 18-24</b>                                      |                             |                             |                             |                            |

|                                                                         |                 |                    |     |                 |
|-------------------------------------------------------------------------|-----------------|--------------------|-----|-----------------|
| <b>years</b>                                                            |                 |                    |     |                 |
| 25-34 years                                                             |                 | -1.070**           |     | 0.558           |
|                                                                         |                 | (-2.127 - -0.0125) |     | (0.182 - 1.713) |
| 35-44 years                                                             |                 | -1.995***          |     | 0.480           |
|                                                                         |                 | (-3.094 - -0.897)  |     | (0.157 - 1.470) |
| 45-54 years                                                             |                 | -2.401***          |     | 0.309**         |
|                                                                         |                 | (-3.574 - -1.228)  |     | (0.098 - 0.974) |
| 55+ years                                                               |                 | -3.384***          |     | 0.361           |
|                                                                         |                 | (-4.907 - -1.860)  |     | (0.089 - 1.469) |
| <b>Change in social status since pandemic baseline: positive change</b> |                 |                    |     |                 |
| Negative change in status                                               |                 | 1.375***           |     | 1.653           |
|                                                                         |                 | (0.478 - 2.272)    |     | (0.747 - 3.657) |
| No change                                                               |                 | 0.217              |     | 0.882           |
|                                                                         |                 | (-0.590 - 1.025)   |     | (0.452 - 1.719) |
| <b>Relationship status baseline: Single</b>                             |                 |                    |     |                 |
| Dating or in a relationship but not living together                     |                 | 0.225              |     | 0.953           |
|                                                                         |                 | (-0.682 - 1.132)   |     | (0.410 - 2.211) |
| Cohabiting/Married/Civil Partner                                        |                 | -0.332             |     | 0.499*          |
|                                                                         |                 | (-1.159 - 0.496)   |     | (0.244 - 1.018) |
| Divorced, Widowed or Prefer not to say                                  |                 | -0.328             |     | 0.625           |
|                                                                         |                 | (-2.463 - 1.806)   |     | (0.119 - 3.282) |
| <b>Ethnicity baseline: not an ethnic minority</b>                       |                 |                    |     |                 |
| Ethnic Minority                                                         |                 | -0.378             |     | 1.525           |
|                                                                         |                 | (-1.353 - 0.598)   |     | (0.642 - 3.626) |
| Prefer not to say                                                       |                 | 1.621              |     | 1.778           |
|                                                                         |                 | (-1.272 - 4.515)   |     | (0.159 - 19.85) |
| <b>Location: Rest of the world (baseline: UK)</b>                       |                 |                    |     |                 |
|                                                                         |                 | -0.0235            |     | 1.076           |
|                                                                         |                 | (-0.916 - 0.869)   |     | (0.496 - 2.332) |
| Constant                                                                | 6.087***        | 7.774***           |     |                 |
|                                                                         | (5.355 - 6.818) | (6.420 - 9.128)    |     |                 |
| Observations                                                            | 310             | 310                | 310 | 310             |
| R-squared                                                               | 0.147           | 0.263              |     |                 |

\*\*\* p<0.01, \*\* p<0.05, \* p<0.1; B: Regression coefficient; O.R: Odds Ratio; CI: Confidence Interval



## Supplementary Materials

### Supplementary Table 1 – Further breakdown of respondents' identities

|                                        | Cisgender<br>Female | Cisgender<br>Male | Transgender<br>Female | Transgender<br>Male | Non-binary<br>or identify<br>with another<br>gender (e.g.<br>agender) | Total |
|----------------------------------------|---------------------|-------------------|-----------------------|---------------------|-----------------------------------------------------------------------|-------|
| <b>Straight-heterosexual</b>           | 0                   | 0                 | 1                     | 0                   | 0                                                                     | 1     |
| <b>Gay/Lesbian</b>                     | 71                  | 93                | 2                     | 2                   | 17                                                                    | 185   |
| <b>Bisexual</b>                        | 42                  | 5                 | 4                     | 3                   | 12                                                                    | 66    |
| <b>Queer</b>                           | 8                   | 5                 | 3                     | 1                   | 8                                                                     | 25    |
| <b>Asexual</b>                         | 3                   | 0                 | 0                     | 1                   | 5                                                                     | 9     |
| <b>Identify with another sexuality</b> | 6                   | 1                 | 2                     | 0                   | 8                                                                     | 17    |
| <b>Prefer not to say</b>               | 0                   | 2                 | 1                     | 0                   | 3                                                                     | 6     |
| <b>Don't Know</b>                      | 1                   | 0                 | 0                     | 0                   | 0                                                                     | 1     |
| <b>Total</b>                           | 131                 | 106               | 13                    | 7                   | 53                                                                    | 310   |

### Supplementary Table 2 – Further breakdown of respondents' identities and mean PSS scores (standard deviation in brackets)

|                                        | Cisgender<br>Female | Cisgender<br>Male | Transgender<br>Female | Transgender<br>Male | Non-binary<br>or identify<br>with another<br>gender (e.g.<br>agender) | Total          |
|----------------------------------------|---------------------|-------------------|-----------------------|---------------------|-----------------------------------------------------------------------|----------------|
| <b>Straight-heterosexual</b>           | /                   | /                 | /                     | /                   | /                                                                     | /              |
| <b>Gay/Lesbian</b>                     | 6.43<br>(3.18)      | 7.03<br>(2.97)    | /                     | /                   | 7.71<br>(3.51)                                                        | 6.92<br>(3.11) |
| <b>Bisexual</b>                        | 8.36<br>(3.27)      | 9.20<br>(3.70)    | /                     | /                   | 9.33<br>(2.93)                                                        | 6.00<br>(3.31) |
| <b>Queer</b>                           | 9.00<br>(2.00)      | 8.8<br>(3.27)     | /                     | /                   | 10.38<br>(1.77)                                                       | 9.36<br>(2.58) |
| <b>Asexual</b>                         | /                   | /                 | /                     | /                   | 10.00<br>(2.24)                                                       | 9.78<br>(1.92) |
| <b>Identify with another sexuality</b> | 7.67<br>(3.33)      | /                 | /                     | /                   | 9.88<br>(2.59)                                                        | 8.88<br>(2.85) |

|                          |                |                |                |                |                |                |
|--------------------------|----------------|----------------|----------------|----------------|----------------|----------------|
| <b>Prefer not to say</b> | /              | /              | /              | /              | /              | 9.00<br>(3.27) |
| <b>Don't Know</b>        | /              | /              | /              | /              | /              | /              |
| <b>Total</b>             | 7.31<br>(3.29) | 7.27<br>(3.07) | 8.46<br>(3.31) | 9.00<br>(2.94) | 9.08<br>(2.97) | 7.68<br>(3.22) |

Notes: values for cells with less than 5 respondents suppressed

#### Supplementary Table 3 – Further breakdown of respondents' identities and proportion with CESD-D-10 scores suggesting significant depressive symptomology

|                                        | Cisgender Female | Cisgender Male | Transgender Female | Transgender Male | Non-binary or identify with another gender (e.g. agender) | Total  |
|----------------------------------------|------------------|----------------|--------------------|------------------|-----------------------------------------------------------|--------|
| <b>Straight-heterosexual</b>           | /                | /              | /                  | /                | /                                                         | /      |
| <b>Gay/Lesbian</b>                     | 63.4%            | 61.3%          | /                  | /                | 82.4%                                                     | 64.3%  |
| <b>Bisexual</b>                        | 80.9%            | 80.0%          | /                  | /                | 91.7%                                                     | 80.3%  |
| <b>Queer</b>                           | 100.0%           | 100.0%         | /                  | /                | 87.5%                                                     | 96.0%  |
| <b>Asexual</b>                         | /                | /              | /                  | /                | 100.0%                                                    | 100.0% |
| <b>Identify with another sexuality</b> | 66.7%            | 100.0%         | /                  | /                | 75.0%                                                     | 70.6%  |
| <b>Prefer not to say</b>               | /                | /              | /                  | /                | /                                                         | 83.3%  |
| <b>Don't Know</b>                      | /                | /              | /                  | /                | /                                                         | /      |
| <b>Total</b>                           | 71.8%            | 64.2%          | 76.9%              | 71.4%            | 86.8%                                                     | 71.9%  |

Notes: values for cells with less than 5 respondents suppressed

#### Supplementary Table 4 – Continuous model estimates of CES-D-10

|                                                     | Unadjusted<br>B(SE) | Adjusted<br>B(SE) |
|-----------------------------------------------------|---------------------|-------------------|
| Any harassment or inappropriate incidents baseline: |                     |                   |
| None                                                |                     |                   |

|    |                                                           |                  |                   |
|----|-----------------------------------------------------------|------------------|-------------------|
| 1  |                                                           |                  |                   |
| 2  |                                                           |                  |                   |
| 3  | Form of harassment reported                               | 3.875***         | 2.700**           |
| 4  |                                                           | (1.852 - 5.899)  | (0.644 - 4.756)   |
| 5  | No information                                            | 0.257            | -0.623            |
| 6  |                                                           | (-2.992 - 3.507) | (-3.852 - 2.606)  |
| 7  |                                                           |                  |                   |
| 8  | <b>Gender ID and Sex Orientation baseline: Cis female</b> |                  |                   |
| 9  | <b>Gay/Lesbian</b>                                        |                  |                   |
| 10 |                                                           |                  |                   |
| 11 | Cis female of another non-heterosexual orientation        | 3.249***         | 2.132*            |
| 12 |                                                           | (0.981 - 5.518)  | (-0.156 - 4.420)  |
| 13 | Transgender and gender diverse                            | 4.797***         | 3.383***          |
| 14 |                                                           | (2.636 - 6.958)  | (1.164 - 5.602)   |
| 15 | Cis male gay                                              | 1.226            | 1.027             |
| 16 |                                                           | (-0.824 - 3.276) | (-1.020 - 3.074)  |
| 17 | Cis male of another non-heterosexual orientation          | 4.336**          | 2.781             |
| 18 |                                                           | (0.435 - 8.238)  | (-1.087 - 6.648)  |
| 19 |                                                           |                  |                   |
| 20 | <b>Age group baseline: 18-24 years</b>                    |                  |                   |
| 21 | 25-34 years                                               |                  | -1.932            |
| 22 |                                                           |                  | (-4.299 - 0.436)  |
| 23 | 35-44 years                                               |                  | -2.899**          |
| 24 |                                                           |                  | (-5.359 - -0.439) |
| 25 | 45-54 years                                               |                  | -4.453***         |
| 26 |                                                           |                  | (-7.080 - -1.826) |
| 27 | 55+ years                                                 |                  | -3.974**          |
| 28 |                                                           |                  | (-7.385 - -0.564) |
| 29 |                                                           |                  |                   |
| 30 |                                                           |                  |                   |
| 31 | <b>Change in social status since pandemic baseline:</b>   |                  |                   |
| 32 | <b>positive change</b>                                    |                  |                   |
| 33 | Negative change in status                                 |                  | 2.649***          |
| 34 |                                                           |                  | (0.641 - 4.658)   |
| 35 | No change                                                 |                  | 0.746             |
| 36 |                                                           |                  | (-1.061 - 2.554)  |
| 37 |                                                           |                  |                   |
| 38 | <b>Relationship status baseline: Single</b>               |                  |                   |
| 39 | Dating or in a relationship but not living together       |                  | 0.440             |
| 40 |                                                           |                  | (-1.591 - 2.472)  |
| 41 | Cohabiting/Married/Civil Partner                          |                  | -1.979**          |
| 42 |                                                           |                  | (-3.831 - -0.127) |
| 43 | Divorced, Widowed or Prefer not to say                    |                  | 0.416             |
| 44 |                                                           |                  | (-4.364 - 5.196)  |
| 45 |                                                           |                  |                   |
| 46 | <b>Ethnicity baseline: not an ethnic minority</b>         |                  |                   |
| 47 | Ethnic Minority                                           |                  | 0.404             |
| 48 |                                                           |                  | (-1.780 - 2.587)  |
| 49 | Prefer not to say                                         |                  | 1.076             |
| 50 |                                                           |                  | (-5.403 - 7.556)  |
| 51 | <b>Location: Rest of the world (baseline: UK)</b>         |                  | -0.0193           |
| 52 |                                                           |                  | (-2.018 - 1.980)  |
| 53 |                                                           |                  |                   |
| 54 |                                                           |                  |                   |
| 55 |                                                           |                  |                   |
| 56 | Constant                                                  | 11.22***         | 14.31***          |
| 57 |                                                           | (9.622 - 12.82)  | (11.28 - 17.34)   |
| 58 |                                                           |                  |                   |
| 59 | Observations                                              | 310              | 310               |
| 60 |                                                           |                  |                   |

| R-squared | 0.126 | 0.208 |
|-----------|-------|-------|
|-----------|-------|-------|

\*\*\* p<0.01, \*\* p<0.05, \* p<0.1

## Supplementary materials – further notes on measures of harassment and discrimination

Respondents were asked:

Since the start of the coronavirus pandemic, have you experienced any of the following in your day-to-day life (going to the shops, walking around the neighbourhood, etc...) because you are LGBTQ+ or others thought you were LGBTQ+?

- verbal harassment, insults or other hurtful comments;
- physical harassment or violence;
- sexual harassment or violence;
- threat of physical or sexual harassment or violence;
- exclusion from events or activities;
- someone disclosing that you are LGBTQ+ to others without your permission;
- any other inappropriate comments or conduct not listed above (please state).
- None

Respondents were free to select multiple options in terms of forms of discrimination.

STROBE Statement—Checklist of items that should be included in reports of *cross-sectional studies*

|                              | Item No | Recommendation                                                                                                                                                                                    | Page No   |
|------------------------------|---------|---------------------------------------------------------------------------------------------------------------------------------------------------------------------------------------------------|-----------|
| <b>Title and abstract</b>    | 1       | (a) Indicate the study's design with a commonly used term in the title or the abstract                                                                                                            | 1         |
|                              |         | (b) Provide in the abstract an informative and balanced summary of what was done and what was found                                                                                               | 2         |
| <b>Introduction</b>          |         |                                                                                                                                                                                                   |           |
| Background/rationale         | 2       | Explain the scientific background and rationale for the investigation being reported                                                                                                              | 4-7       |
| Objectives                   | 3       | State specific objectives, including any prespecified hypotheses                                                                                                                                  | 7         |
| <b>Methods</b>               |         |                                                                                                                                                                                                   |           |
| Study design                 | 4       | Present key elements of study design early in the paper                                                                                                                                           | 7-10      |
| Setting                      | 5       | Describe the setting, locations, and relevant dates, including periods of recruitment, exposure, follow-up, and data collection                                                                   | 7-8       |
| Participants                 | 6       | (a) Give the eligibility criteria, and the sources and methods of selection of participants                                                                                                       | 7         |
| Variables                    | 7       | Clearly define all outcomes, exposures, predictors, potential confounders, and effect modifiers. Give diagnostic criteria, if applicable                                                          | 8-10      |
| Data sources/<br>measurement | 8*      | For each variable of interest, give sources of data and details of methods of assessment (measurement). Describe comparability of assessment methods if there is more than one group              | 8-10      |
| Bias                         | 9       | Describe any efforts to address potential sources of bias                                                                                                                                         | 10-12,19  |
| Study size                   | 10      | Explain how the study size was arrived at                                                                                                                                                         | 7-8       |
| Quantitative variables       | 11      | Explain how quantitative variables were handled in the analyses. If applicable, describe which groupings were chosen and why                                                                      | 10-12     |
| Statistical methods          | 12      | (a) Describe all statistical methods, including those used to control for confounding                                                                                                             | 10-12     |
|                              |         | (b) Describe any methods used to examine subgroups and interactions                                                                                                                               |           |
|                              |         | (c) Explain how missing data were addressed                                                                                                                                                       | 10-12     |
|                              |         | (d) If applicable, describe analytical methods taking account of sampling strategy                                                                                                                |           |
|                              |         | (e) Describe any sensitivity analyses                                                                                                                                                             | 8         |
| <b>Results</b>               |         |                                                                                                                                                                                                   |           |
| Participants                 | 13*     | (a) Report numbers of individuals at each stage of study—eg numbers potentially eligible, examined for eligibility, confirmed eligible, included in the study, completing follow-up, and analysed | 12        |
|                              |         | (b) Give reasons for non-participation at each stage                                                                                                                                              | 12        |
|                              |         | (c) Consider use of a flow diagram                                                                                                                                                                |           |
| Descriptive data             | 14*     | (a) Give characteristics of study participants (eg demographic, clinical, social) and information on exposures and potential confounders                                                          | 12, 25-26 |
|                              |         | (b) Indicate number of participants with missing data for each variable of interest                                                                                                               | 12        |
| Outcome data                 | 15*     | Report numbers of outcome events or summary measures                                                                                                                                              | 12, 25-26 |



1  
2  
3  
4  
5  
6  
7  
8  
9  
10  
11  
12  
13  
14  
15  
16  
17  
18  
19  
20  
21  
22  
23  
24  
25  
26  
27  
28  
29  
30  
31  
32  
33  
34  
35  
36  
37  
38  
39  
40  
41  
42  
43  
44  
45  
46  
47  
48  
49  
50  
51  
52  
53  
54  
55  
56  
57  
58  
59  
60

|                          |    |                                                                                                                                                                                                              |              |
|--------------------------|----|--------------------------------------------------------------------------------------------------------------------------------------------------------------------------------------------------------------|--------------|
| Main results             | 16 | (a) Give unadjusted estimates and, if applicable, confounder-adjusted estimates and their precision (eg, 95% confidence interval). Make clear which confounders were adjusted for and why they were included | 12-15, 26-28 |
|                          |    | (b) Report category boundaries when continuous variables were categorized                                                                                                                                    | 12-15, 26-28 |
|                          |    | (c) If relevant, consider translating estimates of relative risk into absolute risk for a meaningful time period                                                                                             |              |
| Other analyses           | 17 | Report other analyses done—eg analyses of subgroups and interactions, and sensitivity analyses                                                                                                               |              |
| <b>Discussion</b>        |    |                                                                                                                                                                                                              |              |
| Key results              | 18 | Summarise key results with reference to study objectives                                                                                                                                                     | 15-17        |
| Limitations              | 19 | Discuss limitations of the study, taking into account sources of potential bias or imprecision. Discuss both direction and magnitude of any potential bias                                                   | 17-20        |
| Interpretation           | 20 | Give a cautious overall interpretation of results considering objectives, limitations, multiplicity of analyses, results from similar studies, and other relevant evidence                                   | 20-21        |
| Generalisability         | 21 | Discuss the generalisability (external validity) of the study results                                                                                                                                        | 19           |
| <b>Other information</b> |    |                                                                                                                                                                                                              |              |
| Funding                  | 22 | Give the source of funding and the role of the funders for the present study and, if applicable, for the original study on which the present article is based                                                | 21           |

\*Give information separately for exposed and unexposed groups.

**Note:** An Explanation and Elaboration article discusses each checklist item and gives methodological background and published examples of transparent reporting. The STROBE checklist is best used in conjunction with this article (freely available on the Web sites of PLoS Medicine at <http://www.plosmedicine.org/>, Annals of Internal Medicine at <http://www.annals.org/>, and Epidemiology at <http://www.epidem.com/>). Information on the STROBE Initiative is available at [www.strobe-statement.org](http://www.strobe-statement.org).
