# Supplementary material for: Discrimination as a predictor of poor mental health among LGBTQ+ people during the COVID-19 pandemic: cross-sectional analysis of the online Queerantine study
Source: PubMed Central journal article supplement — BMJ Open. 2021 Jun 25;11(6):e049405. doi: 10.1136/bmjopen-2021-049405 (PMC8238529; doi:10.1136/bmjopen-2021-049405), 2021-06-25
Supplement: bmjopen-2021-049405supp001.pdf [file bmjopen-2021-049405supp001.pdf]

1 **Supplementary Materials**

2

3 **Supplementary Table 1 – Further breakdown of respondents' identities**

|                                        | Cisgender<br>Female | Cisgender<br>Male | Transgender<br>Female | Transgender<br>Male | Non-binary<br>or identify<br>with another<br>gender (e.g.<br>agender) | Total |
|----------------------------------------|---------------------|-------------------|-----------------------|---------------------|-----------------------------------------------------------------------|-------|
| <b>Straight-heterosexual</b>           | 0                   | 0                 | 1                     | 0                   | 0                                                                     | 1     |
| <b>Gay/Lesbian</b>                     | 71                  | 93                | 2                     | 2                   | 17                                                                    | 185   |
| <b>Bisexual</b>                        | 42                  | 5                 | 4                     | 3                   | 12                                                                    | 66    |
| <b>Queer</b>                           | 8                   | 5                 | 3                     | 1                   | 8                                                                     | 25    |
| <b>Asexual</b>                         | 3                   | 0                 | 0                     | 1                   | 5                                                                     | 9     |
| <b>Identify with another sexuality</b> | 6                   | 1                 | 2                     | 0                   | 8                                                                     | 17    |
| <b>Prefer not to say</b>               | 0                   | 2                 | 1                     | 0                   | 3                                                                     | 6     |
| <b>Don't Know</b>                      | 1                   | 0                 | 0                     | 0                   | 0                                                                     | 1     |
| <b>Total</b>                           | 131                 | 106               | 13                    | 7                   | 53                                                                    | 310   |

4

5

6 **Supplementary Table 2 – Further breakdown of respondents' identities and mean PSS**  
7 **scores (standard deviation in brackets)**

|                                        | Cisgender<br>Female | Cisgender<br>Male | Transgender<br>Female | Transgender<br>Male | Non-binary<br>or identify<br>with another<br>gender (e.g.<br>agender) | Total          |
|----------------------------------------|---------------------|-------------------|-----------------------|---------------------|-----------------------------------------------------------------------|----------------|
| <b>Straight-heterosexual</b>           | /                   | /                 | /                     | /                   | /                                                                     | /              |
| <b>Gay/Lesbian</b>                     | 6.43<br>(3.18)      | 7.03<br>(2.97)    | /                     | /                   | 7.71<br>(3.51)                                                        | 6.92<br>(3.11) |
| <b>Bisexual</b>                        | 8.36<br>(3.27)      | 9.20<br>(3.70)    | /                     | /                   | 9.33<br>(2.93)                                                        | 6.00<br>(3.31) |
| <b>Queer</b>                           | /                   | /                 | /                     | /                   | 10.38<br>(1.77)                                                       | 9.36<br>(2.58) |
| <b>Asexual</b>                         | /                   | /                 | /                     | /                   | /                                                                     | /              |
| <b>Identify with another sexuality</b> | 7.67<br>(3.33)      | /                 | /                     | /                   | 9.88<br>(2.59)                                                        | 8.88<br>(2.85) |

|                          |                |                |                |                |                |                |
|--------------------------|----------------|----------------|----------------|----------------|----------------|----------------|
| <b>Prefer not to say</b> | /              | /              | /              | /              | /              | 9.00<br>(3.27) |
| <b>Don't Know</b>        | /              | /              | /              | /              | /              | /              |
| <b>Total</b>             | 7.31<br>(3.29) | 7.27<br>(3.07) | 8.46<br>(3.31) | 9.00<br>(2.94) | 9.08<br>(2.97) | 7.68<br>(3.22) |

1 Notes: values for cells with less than 5 respondents suppressed

2

3

4 **Supplementary Table 3 – Further breakdown of respondents' identities and proportion**  
 5 **with CESD-D-10 scores suggesting significant depressive symptomology**

|                                            | <b>Cisgender<br/>Female</b> | <b>Cisgender<br/>Male</b> | <b>Transgender<br/>Female</b> | <b>Transgender<br/>Male</b> | <b>Non-binary<br/>or identify<br/>with another<br/>gender (e.g.<br/>agender)</b> | <b>Total</b> |
|--------------------------------------------|-----------------------------|---------------------------|-------------------------------|-----------------------------|----------------------------------------------------------------------------------|--------------|
| <b>Straight-<br/>heterosexual</b>          | /                           | /                         | /                             | /                           | /                                                                                | /            |
| <b>Gay/Lesbian</b>                         | 63.4%                       | 61.3%                     | /                             | /                           | 82.4%                                                                            | 64.3%        |
| <b>Bisexual</b>                            | 80.9%                       | 80.0%                     | /                             | /                           | 91.7%                                                                            | 80.3%        |
| <b>Queer</b>                               | /                           | /                         | /                             | /                           | 87.5%                                                                            | 96.0%        |
| <b>Asexual</b>                             | /                           | /                         | /                             | /                           | /                                                                                | /            |
| <b>Identify with<br/>another sexuality</b> | 66.7%                       | /                         | /                             | /                           | 75.0%                                                                            | 70.6%        |
| <b>Prefer not to say</b>                   | /                           | /                         | /                             | /                           | /                                                                                | 83.3%        |
| <b>Don't Know</b>                          | /                           | /                         | /                             | /                           | /                                                                                | /            |
| <b>Total</b>                               | 71.8%                       | 64.2%                     | 76.9%                         | 71.4%                       | 86.8%                                                                            | 71.9%        |

6 Notes: / indicates values for cells suppressed for confidentiality

7

8

9

10 **Supplementary Table 4 – Continuous model estimates of CES-D-10**

|                                                             | <b>Unadjusted<br/>B(SE)</b> | <b>Adjusted<br/>B(SE)</b> |
|-------------------------------------------------------------|-----------------------------|---------------------------|
| Any harassment or inappropriate incidents baseline:<br>None |                             |                           |

|                                                                         |                             |                                |
|-------------------------------------------------------------------------|-----------------------------|--------------------------------|
| Form of harassment reported                                             | 3.875***<br>(1.852 - 5.899) | 2.700**<br>(0.644 - 4.756)     |
| No information                                                          | 0.257<br>(-2.992 - 3.507)   | -0.623<br>(-3.852 - 2.606)     |
| <b>Gender ID and Sex Orientation baseline: Cis female Gay/Lesbian</b>   |                             |                                |
| Cis female of another non-heterosexual orientation                      | 3.249***<br>(0.981 - 5.518) | 2.132*<br>(-0.156 - 4.420)     |
| Transgender and gender diverse                                          | 4.797***<br>(2.636 - 6.958) | 3.383***<br>(1.164 - 5.602)    |
| Cis male gay                                                            | 1.226<br>(-0.824 - 3.276)   | 1.027<br>(-1.020 - 3.074)      |
| Cis male of another non-heterosexual orientation                        | 4.336**<br>(0.435 - 8.238)  | 2.781<br>(-1.087 - 6.648)      |
| <b>Age group baseline: 18-24 years</b>                                  |                             |                                |
| 25-34 years                                                             |                             | -1.932<br>(-4.299 - 0.436)     |
| 35-44 years                                                             |                             | -2.899**<br>(-5.359 - -0.439)  |
| 45-54 years                                                             |                             | -4.453***<br>(-7.080 - -1.826) |
| 55+ years                                                               |                             | -3.974**<br>(-7.385 - -0.564)  |
| <b>Change in social status since pandemic baseline: positive change</b> |                             |                                |
| Negative change in status                                               |                             | 2.649***<br>(0.641 - 4.658)    |
| No change                                                               |                             | 0.746<br>(-1.061 - 2.554)      |
| <b>Relationship status baseline: Single</b>                             |                             |                                |
| Dating or in a relationship but not living together                     |                             | 0.440<br>(-1.591 - 2.472)      |
| Cohabiting/Married/Civil Partner                                        |                             | -1.979**<br>(-3.831 - -0.127)  |
| Divorced, Widowed or Prefer not to say                                  |                             | 0.416<br>(-4.364 - 5.196)      |
| <b>Ethnicity baseline: not an ethnic minority</b>                       |                             |                                |
| Ethnic Minority                                                         |                             | 0.404<br>(-1.780 - 2.587)      |
| Prefer not to say                                                       |                             | 1.076<br>(-5.403 - 7.556)      |
| <b>Location: Rest of the world (baseline: UK)</b>                       |                             |                                |
|                                                                         |                             | -0.0193<br>(-2.018 - 1.980)    |
| Constant                                                                | 11.22***<br>(9.622 - 12.82) | 14.31***<br>(11.28 - 17.34)    |
| Observations                                                            | 310                         | 310                            |

|    | R-squared                                                                                   | 0.126                          | 0.208 |
|----|---------------------------------------------------------------------------------------------|--------------------------------|-------|
| 1  |                                                                                             |                                |       |
| 2  |                                                                                             | *** p<0.01, ** p<0.05, * p<0.1 |       |
| 3  |                                                                                             |                                |       |
| 4  |                                                                                             |                                |       |
| 5  |                                                                                             |                                |       |
| 6  | <b>Supplementary materials – further notes on measures of harassment and discrimination</b> |                                |       |
| 7  | Respondents were asked:                                                                     |                                |       |
| 8  | Since the start of the coronavirus pandemic, have you experienced any of the following in   |                                |       |
| 9  | your day-to-day life (going to the shops, walking around the neighbourhood, etc...)         |                                |       |
| 10 | because you are LGBTQ+ or others thought you were LGBTQ+?                                   |                                |       |
| 11 | • verbal harassment, insults or other hurtful comments;                                     |                                |       |
| 12 | • physical harassment or violence;                                                          |                                |       |
| 13 | • sexual harassment or violence;                                                            |                                |       |
| 14 | • threat of physical or sexual harassment or violence;                                      |                                |       |
| 15 | • exclusion from events or activities;                                                      |                                |       |
| 16 | • someone disclosing that you are LGBTQ+ to others without your permission;                 |                                |       |
| 17 | • any other inappropriate comments or conduct not listed above (please state).              |                                |       |
| 18 | • None                                                                                      |                                |       |
| 19 | Respondents were free to select multiple options in terms of forms of discrimination.       |                                |       |
| 20 |                                                                                             |                                |       |
